# Supplementary material for: Tripleipso-defluoroetherification of (trifluoromethyl)alkenes with fluoroalkylated alcohols: access to fluoroalkylated orthoestersviaC(sp3)–F bond cleavage
Source: Royal Society of Chemistry journal article supplement (doi:10.1039/d3cc01760e), 2023-01-01

# Supporting Information

## Triple *ipso*-defluoroetherification of (trifluoromethyl)alkenes with fluoroalkylated alcohols: Access to fluoroalkylated orthoesters by C(sp<sup>3</sup>)-F bonds cleavage

Jia Nie, Huanfeng Jiang, and Chuanle Zhu\*

School of Chemistry and Chemical Engineering, Key Laboratory of Functional Molecular  
Engineering of Guangdong Province, South China University of Technology, Guangzhou 510640,  
P. R. China; Pazhou Lab, Guangzhou, 510330, China

E-mail: cechlzhu@scut.edu.cn; Fax and Tel.: (+86) 20-87112906

|                                                                                                      |    |
|------------------------------------------------------------------------------------------------------|----|
| <b>A. General Information</b> .....                                                                  | 2  |
| <b>B. Experiment Section</b> .....                                                                   | 3  |
| 1) Substrates Preparation.....                                                                       | 3  |
| 2) Optimization of the Reaction Conditions .....                                                     | 4  |
| 3) General Procedure for the Reaction of Fluoroalkylated Alcohols with Alkenes.....                  | 4  |
| 4) Characterization of Obtained Products .....                                                       | 5  |
| 5) General Procedure for Gram-Scale Synthesis .....                                                  | 15 |
| 6) General Procedure for Further Derivatization of the Obtained Fluoroalkylated<br>orthoesters ..... | 15 |
| 7) Control Experiments .....                                                                         | 16 |
| <b>C. References</b> .....                                                                           | 18 |
| <b>D. NMR Spectra of Compounds</b> .....                                                             | 19 |

## A. General Information

Melting points were measured using a melting point instrument and are uncorrected. Chemical shifts were reported in ppm from the solvent resonance as the internal standard ( $\text{CDCl}_3$   $\delta_{\text{H}} = 7.26$  ppm,  $\delta_{\text{C}} = 77.16$  ppm). Multiplicity was indicated as follows: s (singlet), d (doublet), t (triplet), q (quartet), dd (doublet of doublets), td (triplet of doublets), m (multiplet), and *etc.* Coupling constants were reported in Hertz (Hz).  $^1\text{H}$ ,  $^{13}\text{C}$  and  $^{19}\text{F}$  NMR data are recorded with Bruker Advance III 400 MHz or 500 MHz. All  $^{13}\text{C}$  and  $^{19}\text{F}$  NMR spectra were performed under the conditions of  $^1\text{H}$ -decoupled conditions, respectively. NMR spectra were recorded at room temperature unless otherwise stated. IR spectra were obtained with an infrared spectrometer on either potassium bromide pellets or liquid films between two potassium bromide pellets. HRMS was carried out on a high-resolution mass spectrometer (Thermo Q Exactive Plus ACPI/QE MS). TLC was performed using commercially available 100-400 mesh glass-backed silica-coated plates (GF<sub>254</sub>). Visualization was typically performed using UV light and/or phosphomolybdic acid.

**Materials.** Commercially available reagents and solvents were purchased and used without further purification. The anhydrous THF was purchased from Energy Chemical (Energy Chemical, water  $\leq 50$  ppm). Analytical thin-layer chromatography was performed on 0.20 mm silica gel plates (GF<sub>254</sub>) using UV light or phosphomolybdic acid as a visualizing agent. Flash column chromatography was carried out using silica gel (200-300 mesh) with the indicated solvent system. All reactions were conducted in oven-dried Schlenk tubes. All the reaction temperatures reported are oil bath temperatures.

## B. Experiment Section

### 1) Substrates Preparation

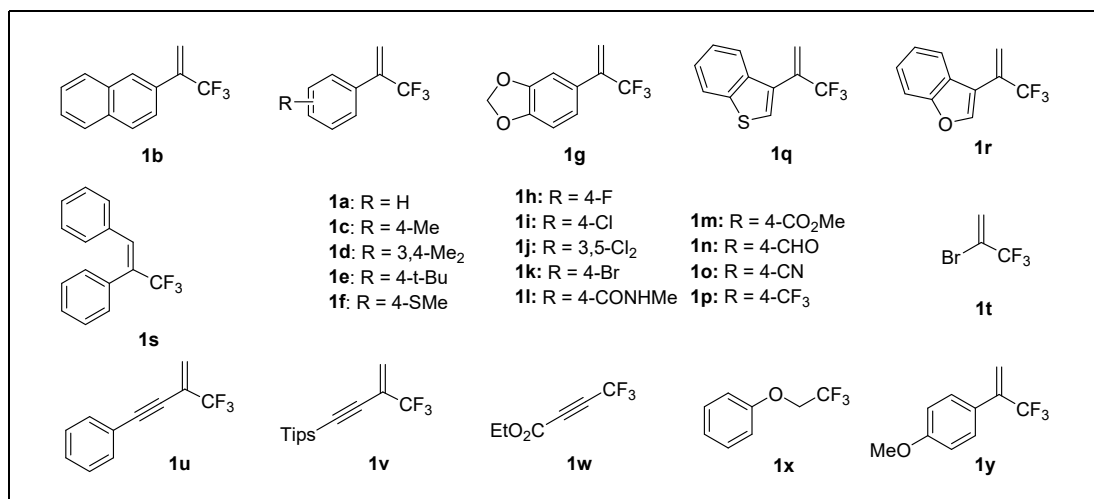

1t and 1w was known compound and commercial available (from Energy Chemical and Bidepharm). Compound 1a-1r,<sup>1</sup> 1s,<sup>2</sup> 1u-1v<sup>3</sup>, 1x<sup>4</sup>, 1y<sup>1</sup> were synthesized following the reported methods.

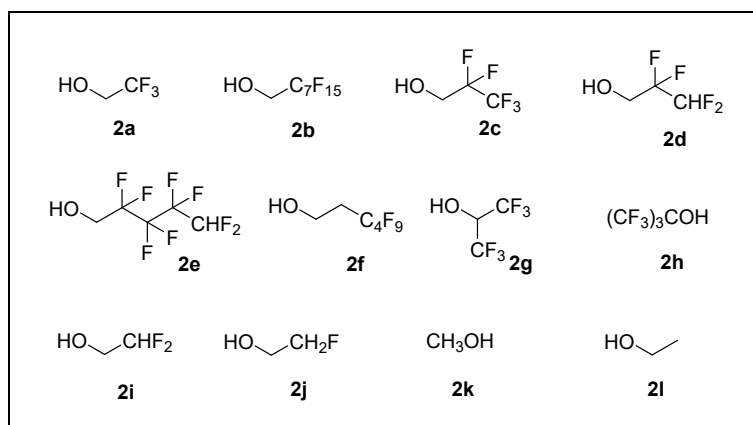

Alcohols 2 were known compounds. 2a-2l were purchased and used directly (from Energy Chemical, Bidepharm and Innochem).

## 2) Optimization of the Reaction Conditions<sup>a</sup>

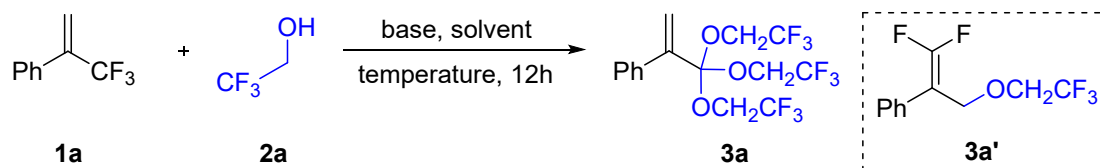

| Entry | Base                            | Solvent | Temperature (°C) | Yield of <b>3a</b> (%) <sup>b</sup> |
|-------|---------------------------------|---------|------------------|-------------------------------------|
| 1     | Cs <sub>2</sub> CO <sub>3</sub> | toluene | 60               | 0                                   |
| 2     | Cs <sub>2</sub> CO <sub>3</sub> | xylene  | 60               | 0                                   |
| 3     | Cs <sub>2</sub> CO <sub>3</sub> | THF     | 60               | 0                                   |
| 4     | Cs <sub>2</sub> CO <sub>3</sub> | MeCN    | 60               | 13                                  |
| 5     | Cs <sub>2</sub> CO <sub>3</sub> | DMSO    | 60               | 95                                  |
| 6     | Cs <sub>2</sub> CO <sub>3</sub> | DMF     | 60               | 82                                  |
| 7     | Li <sub>2</sub> CO <sub>3</sub> | DMSO    | 60               | 0                                   |
| 8     | <i>t</i> -BuOLi                 | DMSO    | 60               | 80                                  |
| 9     | <i>t</i> -BuONa                 | DMSO    | 60               | 72                                  |
| 10    | <i>t</i> -BuOK                  | DMSO    | 60               | 68                                  |
| 11    | KOH                             | DMSO    | 60               | 72                                  |
| 12    | LiOH                            | DMSO    | 60               | 65                                  |
| 13    | DBU                             | DMSO    | 60               | 0                                   |
| 14    | DABCO                           | DMSO    | 60               | 0                                   |
| 15    | Et <sub>3</sub> N               | DMSO    | 60               | 0                                   |
| 16    | -                               | DMSO    | 30               | 0                                   |
| 17    | Cs <sub>2</sub> CO <sub>3</sub> | DMSO    | 50               | 97                                  |
| 18    | Cs <sub>2</sub> CO <sub>3</sub> | DMSO    | 40               | 99                                  |
| 19    | Cs <sub>2</sub> CO <sub>3</sub> | DMSO    | 30               | 88                                  |
| 20    | Cs <sub>2</sub> CO <sub>3</sub> | DMSO    | 80               | 88                                  |

<sup>a</sup>Unless otherwise noted, the reactions were carried out with **1a** (0.2 mmol), **2a** (0.8 mmol), base (1.0 mmol), and solvent (2 mL) in a 25 mL Schlenk tube in an oil bath for 12 h. <sup>b</sup>Isolated yields.

## 3) General Procedure for the Reaction of Fluoroalkylated Alcohols with Alkenes

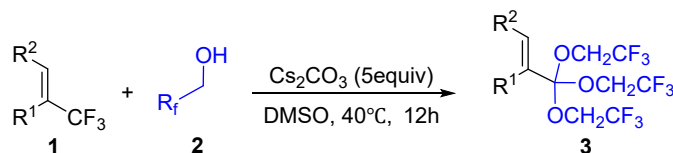

To a 25 mL Schlenk flask was charged with alkenes **1** (0.2 mmol, 1.0 equiv), fluoroalkylated alcohols (0.8 mmol, 4.0 equiv), Cs<sub>2</sub>CO<sub>3</sub> (1.0 mmol, 5.0 equiv) and a solvent of DMSO (2.0 mL). The resulting solution was stirred at 40 °C for 12 h. Then the mixture was cooled to room temperature, quenched with H<sub>2</sub>O (15 mL), extracted with EtOAc (15 mL × 3). The combined

organic layer was dried over anhydrous  $\text{Na}_2\text{SO}_4$ , filtered and concentrated in vacuo. Further purification by flash column chromatography on silica gel provided the products **3**.

#### 4) Characterization of Obtained Products

##### (3,3,3-tris(2,2,2-trifluoroethoxy)prop-1-en-2-yl)benzene (**3a**)

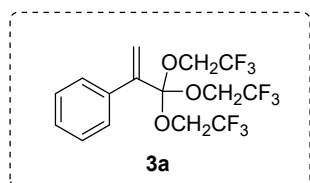

83.3 mg, 99% yield; yellow oil, eluting with EtOAc/PE = 1: 10;  $^1\text{H}$  NMR (500 MHz,  $\text{CDCl}_3$ )  $\delta$  7.58 (dd,  $J = 6.8, 3.0$  Hz, 2H), 7.42-7.31 (m, 3H), 5.97 (s, 1H), 5.90 (s, 1H), 3.88 (q,  $J = 8.3$  Hz, 6H);  $^{13}\text{C}$  NMR (126 MHz,  $\text{CDCl}_3$ )  $\delta$  140.0, 134.6, 129.0, 128.7, 126.9, 123.3 (q,  $^1J_{\text{F-C}} = 277.2$  Hz), 122.2, 113.8, 60.8 (q,  $^2J_{\text{F-C}} = 36.5$  Hz);  $^{19}\text{F}$  NMR (471 MHz,  $\text{CDCl}_3$ )  $\delta$  -73.7 (s, 9F); IR (KBr): 2950, 1421, 1287, 1172, 1094, 960, 854, 761, 700, 625, 549  $\text{cm}^{-1}$ ; HRMS (APCI-QE,  $m/z$ ):  $[\text{M-H}]^-$  Calcd. for  $\text{C}_{15}\text{H}_{13}\text{F}_9\text{O}_3\text{-H}$ , 411.0648; found, 411.0649.

##### 2-(3,3,3-tris(2,2,2-trifluoroethoxy)prop-1-en-2-yl)naphthalene (**3b**)

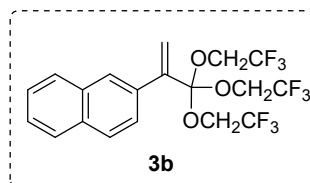

117.0 mg, 98% yield; white solid, mp: 70-71  $^\circ\text{C}$ , eluting with EtOAc/PE = 1: 10;  $^1\text{H}$  NMR (400 MHz,  $\text{CDCl}_3$ )  $\delta$  8.19 (d,  $J = 1.9$  Hz, 1H), 7.97-7.84 (m, 3H), 7.73 (dd,  $J = 8.7, 1.9$  Hz, 1H), 7.56 (dd,  $J = 6.3, 3.2$  Hz, 2H), 6.17 (s, 1H), 6.06 (s, 1H), 3.99 (q,  $J = 8.3$  Hz, 6H);  $^{13}\text{C}$  NMR (101 MHz,  $\text{CDCl}_3$ )  $\delta$  139.8, 133.3, 133.3, 131.7, 128.7, 128.3, 127.5, 126.9, 126.6, 126.5, 124.3, 123.3 (q,  $^1J_{\text{F-C}} = 277.2$  Hz), 122.6, 114.0, 60.9 (q,  $^2J_{\text{F-C}} = 36.4$  Hz);  $^{19}\text{F}$  NMR (376 MHz,  $\text{CDCl}_3$ )  $\delta$  -73.7 (s, 9F); IR (KBr): 2977, 1421, 1286, 1167, 1102, 1021, 962, 857, 821, 748, 467  $\text{cm}^{-1}$ ; HRMS (APCI-QE,  $m/z$ ):  $[\text{M}]^+$  Calcd. for  $\text{C}_{19}\text{H}_{15}\text{F}_9\text{O}_3$ , 462.0878; found, 462.0871.

##### 1-methyl-4-(3,3,3-tris(2,2,2-trifluoroethoxy)prop-1-en-2-yl)benzene (**3c**)

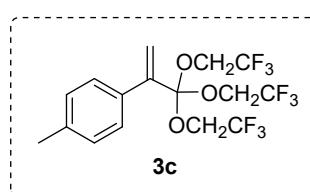

74.1 mg, 84% yield; yellow oil, eluting with PE;  $^1\text{H}$  NMR (400 MHz,  $\text{CDCl}_3$ )  $\delta$  7.56-7.48 (m, 2H), 7.20 (d,  $J = 8.0$  Hz, 2H), 5.98 (s, 1H), 5.90 (s, 1H), 3.90 (q,  $J = 8.3$  Hz, 6H), 2.39 (s, 3H);  $^{13}\text{C}$  NMR (126 MHz,  $\text{CDCl}_3$ )  $\delta$  139.6, 139.1, 131.5, 129.4, 126.7, 123.3 (q,  $^1J_{\text{F-C}} = 277.2$  Hz), 121.4, 113.9, 60.8 (q,  $^2J_{\text{F-C}} = 36.5$  Hz), 21.1;  $^{19}\text{F}$  NMR (471 MHz,  $\text{CDCl}_3$ )  $\delta$  -73.7 (s, 9F); IR (KBr): 2895, 1513, 1419, 1284, 1164, 1096, 1017, 960, 823, 754, 686, 542, 473

cm<sup>-1</sup>; HRMS (APCI-QE, m/z): [M-H]<sup>-</sup> Calcd. for C<sub>16</sub>H<sub>15</sub>F<sub>9</sub>O<sub>3</sub>-H, 425.0805; found, 425.0805.

### 1,2-dimethyl-4-(3,3,3-tris(2,2,2-trifluoroethoxy)prop-1-en-2-yl)benzene (3d)

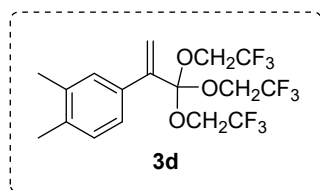

74.1 mg, 80% yield; yellow oil, eluting with PE; <sup>1</sup>H NMR (500 MHz, CDCl<sub>3</sub>) δ 7.40-7.30 (m, 2H), 7.12 (d, *J* = 7.9 Hz, 1H), 5.94 (s, 1H), 5.85 (s, 1H), 3.87 (q, *J* = 8.3 Hz, 6H), 2.27 (s, 6H); <sup>13</sup>C NMR (126 MHz, CDCl<sub>3</sub>) δ 139.7, 137.7, 136.9, 132.0, 129.9, 127.9, 124.2, 122.3 (q, <sup>1</sup>*J*<sub>F-C</sub> = 277.2 Hz), 121.3, 114.0, 60.8 (q, <sup>2</sup>*J*<sub>F-C</sub> = 36.5 Hz), 19.8, 19.5; <sup>19</sup>F NMR (471 MHz, CDCl<sub>3</sub>) δ -73.7 (s, 9F); IR (KBr): 2963, 1607, 1513, 1461, 1422, 1287, 1168, 1097, 1023, 964, 841, 804, 746, 689, 605, 546 cm<sup>-1</sup>; HRMS (APCI-QE, m/z): [M-H]<sup>-</sup> Calcd. for C<sub>17</sub>H<sub>17</sub>F<sub>9</sub>O<sub>3</sub>-H, 439.0961; found, 439.0961.

### 1-(tert-butyl)-4-(3,3,3-tris(2,2,2-trifluoroethoxy)prop-1-en-2-yl)benzene (3e)

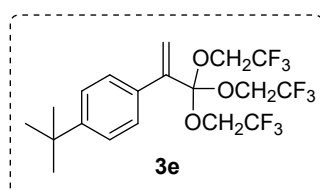

87.1 mg, 97% yield; yellow oil, eluting with PE; <sup>1</sup>H NMR (400 MHz, CDCl<sub>3</sub>) δ 7.60-7.53 (m, 2H), 7.45-7.39 (m, 2H), 6.00 (s, 1H), 5.92 (s, 1H), 3.90 (q, *J* = 8.4 Hz, 6H), 1.36 (s, 9H); <sup>13</sup>C NMR (101 MHz, CDCl<sub>3</sub>) δ 152.2, 139.6, 131.4, 126.5, 125.6, 123.3 (q, <sup>1</sup>*J*<sub>F-C</sub> = 277.8 Hz), 121.6, 113.9, 60.8 (q, <sup>2</sup>*J*<sub>F-C</sub> = 36.4 Hz), 34.6, 31.1; <sup>19</sup>F NMR (471 MHz, CDCl<sub>3</sub>) δ -73.7 (s, 9F); IR (KBr): 2963, 1741, 1411, 1283, 1168, 1108, 965, 840, 747, 556 cm<sup>-1</sup>; HRMS (APCI-QE, m/z): [M+H]<sup>+</sup> Calcd. for C<sub>19</sub>H<sub>21</sub>F<sub>9</sub>O<sub>3</sub>+H, 469.1420; found, 469.1412.

### methyl(4-(3,3,3-tris(2,2,2-trifluoroethoxy)prop-1-en-2-yl)phenyl)sulfane (3f)

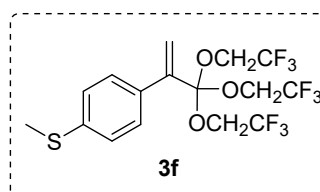

91.7 mg, 99% yield; yellow oil, eluting with PE; <sup>1</sup>H NMR (500 MHz, CDCl<sub>3</sub>) δ 7.45 (dd, *J* = 8.5, 1.3 Hz, 2H), 7.15 (dd, *J* = 8.4, 1.3 Hz, 2H), 5.89 (d, *J* = 1.2 Hz, 1H), 5.80 (d, *J* = 1.2 Hz, 1H), 3.79 (q, *J* = 8.3 Hz, 6H), 2.42 (d, *J* = 1.3 Hz, 3H); <sup>13</sup>C NMR (126 MHz, CDCl<sub>3</sub>) δ 140.1, 139.1, 130.8, 127.1, 126.1, 123.3 (q, <sup>1</sup>*J*<sub>F-C</sub> = 277.2 Hz), 121.4, 113.8, 60.8 (q, <sup>2</sup>*J*<sub>F-C</sub> = 36.5 Hz), 15.2; <sup>19</sup>F NMR (471 MHz, CDCl<sub>3</sub>) δ -73.7 (s, 9F); IR (KBr): 2962, 1598, 1495, 1422, 1285, 1168, 1095, 1019, 961, 834, 750, 689 cm<sup>-1</sup>; HRMS (APCI-QE, m/z): [M]<sup>+</sup> Calcd. for C<sub>16</sub>H<sub>15</sub>F<sub>9</sub>O<sub>3</sub>S, 458.0598; found, 458.0590.

### 5-(3,3,3-tris(2,2,2-trifluoroethoxy)prop-1-en-2-yl)benzo[d][1,3]dioxole (3g)

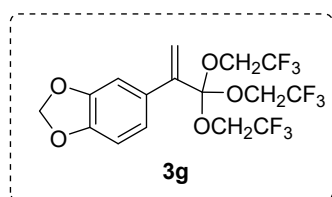

94.8 mg, 95% yield; yellow oil, eluting with EtOAc/PE = 1: 10;

$^1\text{H}$  NMR (500 MHz,  $\text{CDCl}_3$ )  $\delta$  7.14-7.05 (m, 2H), 6.80 (d,  $J = 8.2$  Hz, 1H), 5.99 (s, 2H), 5.88 (s, 1H), 5.83 (s, 1H), 3.87 (q,  $J = 8.3$  Hz, 6H);  $^{13}\text{C}$  NMR (126 MHz,  $\text{CDCl}_3$ )  $\delta$  148.2, 148.0, 139.3,

128.4, 123.3 (q,  $^1J_{F-C} = 277.2$  Hz), 121.1, 121.0, 113.8, 108.4, 107.2, 101.4, 60.8 (q,  $^2J_{F-C} = 36.5$  Hz);  $^{19}\text{F}$  NMR (471 MHz,  $\text{CDCl}_3$ )  $\delta$  -73.8 (s, 9F); IR (KBr): 3304, 1491, 1420, 1284, 1237, 1168, 1100, 960, 812, 751, 688  $\text{cm}^{-1}$ ; HRMS (APCI-QE,  $m/z$ ):  $[\text{M}-\text{H}]^-$  Calcd. for  $\text{C}_{16}\text{H}_{13}\text{F}_9\text{O}_5\text{-H}$ , 455.0547; found, 455.0545.

### 1-fluoro-4-(3,3,3-tris(2,2,2-trifluoroethoxy)prop-1-en-2-yl)benzene (3h)

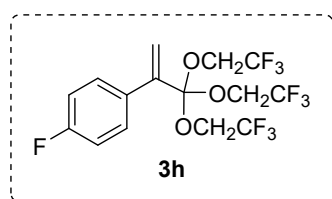

92.2 mg, 96% yield; yellow oil, eluting with PE;  $^1\text{H}$  NMR (400

MHz,  $\text{CDCl}_3$ )  $\delta$  7.64-7.55 (m, 2H), 7.08 (t,  $J = 8.7$  Hz, 2H), 5.96 (s, 1H), 5.90 (s, 1H), 3.90 (q,  $J = 8.3$  Hz, 6H);  $^{13}\text{C}$  NMR (101

MHz,  $\text{CDCl}_3$ )  $\delta$  163.1 (d,  $^1J_{F-C} = 250.5$  Hz), 139.0, 130.6 (d,  $^4J_{F-C} = 3.0$  Hz), 128.8 (d,  $^3J_{F-C} = 8.1$  Hz), 123.2 (q,  $^1J_{F-C} = 277.8$  Hz), 121.8, 115.6 (d,  $^2J_{F-C} = 21.2$  Hz), 113.7, 60.8 (q,  $^2J_{F-C} = 36.4$  Hz);  $^{19}\text{F}$  NMR (471 MHz,  $\text{CDCl}_3$ )  $\delta$  -73.8 (s, 9F),  $\delta$  -112.5 (s, 1F); IR (KBr): 2378, 1636, 1511, 1421, 1282, 1165, 1097, 962, 843, 751, 604, 536, 472  $\text{cm}^{-1}$ ; HRMS (APCI-QE,  $m/z$ ):  $[\text{M}-\text{H}]^-$  Calcd. for  $\text{C}_{15}\text{H}_{12}\text{F}_{10}\text{O}_3\text{-H}$ , 429.0554; found, 429.0555.

### 1-chloro-4-(3,3,3-tris(2,2,2-trifluoroethoxy)prop-1-en-2-yl)benzene (3i)

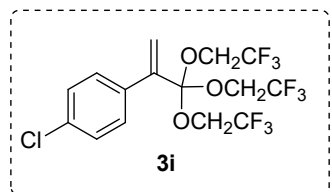

80.7 mg, 92% yield; white solid, mp: 64-65  $^\circ\text{C}$ , eluting with PE;

$^1\text{H}$  NMR (500 MHz,  $\text{CDCl}_3$ )  $\delta$  7.53 (d,  $J = 8.7$  Hz, 2H), 7.34 (d,  $J = 8.6$  Hz, 2H), 5.97 (s, 1H), 5.90 (s, 1H), 3.87 (q,  $J = 8.3$  Hz, 6H);

$^{13}\text{C}$  NMR (126 MHz,  $\text{CDCl}_3$ )  $\delta$  138.9, 135.1, 133.0, 128.9, 128.2,

123.2 (q,  $^1J_{F-C} = 277.2$  Hz), 122.4, 113.6, 60.8 (q,  $^2J_{F-C} = 36.5$  Hz);  $^{19}\text{F}$  NMR (471 MHz,  $\text{CDCl}_3$ )  $\delta$  -73.7 (s, 9F); IR (KBr): 2977, 2316, 1495, 1421, 1286, 1169, 1095, 1016, 961, 842, 749  $\text{cm}^{-1}$ ; HRMS (APCI-QE,  $m/z$ ):  $[\text{M}-\text{H}]^-$  Calcd. for  $\text{C}_{15}\text{H}_{12}\text{ClF}_9\text{O}_3\text{-H}$ , 445.0259; found, 445.0262.

### 1,3-dichloro-5-(3,3,3-tris(2,2,2-trifluoroethoxy)prop-1-en-2-yl)benzene (3j)

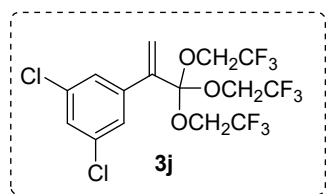

62.1 mg, 66% yield; white solid, mp: 68-69 °C, eluting with EtOAc/PE = 1: 10; <sup>1</sup>H NMR (400 MHz, CDCl<sub>3</sub>) δ 7.47 (d, *J* = 1.9 Hz, 2H), 7.39 (t, *J* = 1.9 Hz, 1H), 6.00 (s, 1H), 5.94 (s, 1H), 3.92 (q, *J* = 8.2 Hz, 6H); <sup>13</sup>C NMR (101 MHz, CDCl<sub>3</sub>) δ 138.3, 137.7, 135.2, 128.9, 125.6, 123.1 (q, <sup>1</sup>*J*<sub>F-C</sub> = 277.8 Hz), 123.6, 113.3, 61.0 (q, <sup>2</sup>*J*<sub>F-C</sub> = 36.4 Hz); <sup>19</sup>F NMR (376 MHz, CDCl<sub>3</sub>) δ -73.7 (s, 9F); IR (KBr): 3055, 1559, 1420, 1269, 1169, 1100, 961, 857, 803, 743 cm<sup>-1</sup>; HRMS (APCI-QE, *m/z*): [M+H]<sup>+</sup> Calcd. for C<sub>15</sub>H<sub>11</sub>Cl<sub>2</sub>F<sub>9</sub>O<sub>3</sub>+H, 481.0014; found, 481.0014.

### 1-bromo-4-(3,3,3-tris(2,2,2-trifluoroethoxy)prop-1-en-2-yl)benzene (3k)

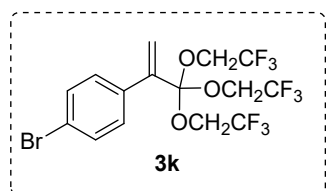

88.7 mg, 86% yield; yellow solid, mp: 72-73 °C, eluting with PE; <sup>1</sup>H NMR (400 MHz, CDCl<sub>3</sub>) δ 7.57-7.44 (m, 4H), 6.00 (s, 1H), 5.93 (s, 1H), 3.90 (q, *J* = 8.3 Hz, 6H); <sup>13</sup>C NMR (101 MHz, CDCl<sub>3</sub>) δ 139.0, 133.4, 131.8, 128.5, 123.4, 123.2 (q, <sup>1</sup>*J*<sub>F-C</sub> = 277.8 Hz), 122.4, 113.6, 60.5 (q, <sup>2</sup>*J*<sub>F-C</sub> = 36.4 Hz); <sup>19</sup>F NMR (471 MHz, CDCl<sub>3</sub>) δ -73.7 (s, 9F); IR (KBr): 2962, 1489, 1421, 1286, 1169, 1090, 961, 836, 752, 689, 548 cm<sup>-1</sup>; HRMS (APCI-QE, *m/z*): [M]<sup>+</sup> Calcd. for C<sub>15</sub>H<sub>12</sub>BrF<sub>9</sub>O<sub>3</sub>, 489.9826; found, 489.9830.

### *N*-methyl-4-(3,3,3-tris(2,2,2-trifluoroethoxy)prop-1-en-2-yl)benzamide (3l)

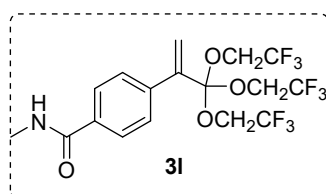

88.0 mg, 94% yield; yellow solid, mp: 144-145 °C, eluting with EtOAc; <sup>1</sup>H NMR (500 MHz, CDCl<sub>3</sub>) δ 7.70 (d, *J* = 8.1 Hz, 2H), 7.57 (d, *J* = 8.2 Hz, 2H), 6.34-6.18 (m, 1H), 5.98 (s, 1H), 5.89 (s, 1H), 3.81 (q, *J* = 8.3 Hz, 6H), 2.95 (d, *J* = 4.9 Hz, 3H); <sup>13</sup>C NMR (126 MHz, CDCl<sub>3</sub>) δ 167.5, 139.2, 137.4, 134.9, 127.2, 127.1, 123.3, 123.2 (q, <sup>1</sup>*J*<sub>F-C</sub> = 277.2 Hz), 113.6, 60.8, 26.9 (q, <sup>2</sup>*J*<sub>F-C</sub> = 36.5 Hz); <sup>19</sup>F NMR (471 MHz, CDCl<sub>3</sub>) δ -73.7 (s, 9F); IR (KBr): 3340, 2914, 1724, 1630, 1546, 1411, 1282, 1163, 1088, 955, 855, 766, 634, 467 cm<sup>-1</sup>; HRMS (APCI-QE, *m/z*): [M+H]<sup>+</sup> Calcd. for C<sub>17</sub>H<sub>16</sub>F<sub>9</sub>NO<sub>4</sub>+H, 470.1008; found, 470.1008.

### methyl 4-(3,3,3-tris(2,2,2-trifluoroethoxy)prop-1-en-2-yl)benzoate (3m)



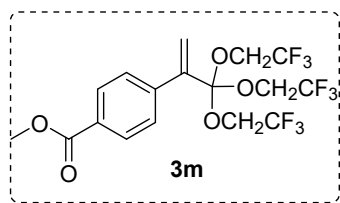

49.8 mg, 57% yield; yellow oil, eluting with EtOAc/PE = 1: 10;

$^1\text{H}$  NMR (500 MHz,  $\text{CDCl}_3$ )  $\delta$  8.07-7.99 (m, 2H), 7.65 (d,  $J = 8.1$  Hz, 2H), 6.06 (s, 1H), 5.98 (s, 1H), 3.98-3.82 (m, 9H);  $^{13}\text{C}$  NMR

(126 MHz,  $\text{CDCl}_3$ )  $\delta$  166.6, 139.4, 139.0, 130.5, 129.9, 127.0,

123.6, 123.2 (q,  $^1J_{F-C} = 277.2$  Hz), 113.6, 60.9 (q,  $^2J_{F-C} = 36.5$  Hz), 52.2;  $^{19}\text{F}$  NMR (471 MHz,

$\text{CDCl}_3$ )  $\delta$  -73.7 (s, 9F); IR (KBr): 3152, 2974, 1752, 1641, 1426, 1288, 1173, 1097, 960, 856, 746,

688, 626  $\text{cm}^{-1}$ ; HRMS (APCI-QE, m/z):  $[\text{M}+\text{H}]^+$  Calcd. for  $\text{C}_{17}\text{H}_{15}\text{F}_9\text{O}_5$ , 471.0849; found,

471.0849.

#### 4-(3,3,3-tris(2,2,2-trifluoroethoxy)prop-1-en-2-yl)benzaldehyde (3n)

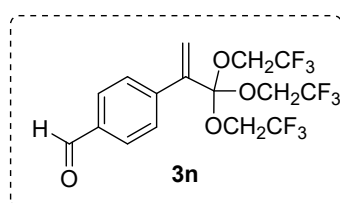

93.3 mg, 76% yield; yellow solid, mp: 68-69 °C, eluting with

EtOAc/PE = 1: 10;  $^1\text{H}$  NMR (500 MHz,  $\text{CDCl}_3$ )  $\delta$  10.03 (d,  $J =$

1.8 Hz, 1H), 7.92-7.85 (m, 2H), 7.75 (d,  $J = 8.1$  Hz, 2H), 6.09 (s,

1H), 6.01 (s, 1H), 3.91 (q,  $J = 8.3$  Hz, 6H);  $^{13}\text{C}$  NMR (126 MHz,

$\text{CDCl}_3$ )  $\delta$  191.6, 140.6, 139.4, 136.3, 129.8, 127.6, 124.1, 123.1 (q,  $^1J_{F-C} = 277.2$  Hz), 113.6, 60.9

(q,  $^2J_{F-C} = 36.5$  Hz);  $^{19}\text{F}$  NMR (471 MHz,  $\text{CDCl}_3$ )  $\delta$  -73.7 (s, 9F); IR (KBr): 2921, 1670, 1606,

1418, 1283, 1167, 1088, 959, 842, 754, 687  $\text{cm}^{-1}$ ; HRMS (APCI-QE, m/z):  $[\text{M}+\text{H}]^+$  Calcd. for

$\text{C}_{16}\text{H}_{13}\text{F}_9\text{O}_4+\text{H}$ , 441.0743; found, 441.0744.

#### 4-(3,3,3-tris(2,2,2-trifluoroethoxy)prop-1-en-2-yl)benzonitrile (3o)

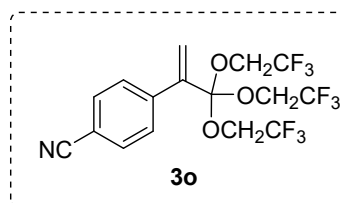

70.2 mg, 80% yield; white solid, mp: 94-95 °C, eluting with

EtOAc/PE = 1: 10;  $^1\text{H}$  NMR (500 MHz,  $\text{CDCl}_3$ )  $\delta$  7.67-7.54 (m,

4H), 5.98 (s, 1H), 5.92 (s, 1H), 3.82 (q,  $J = 8.2$  Hz, 6H);  $^{13}\text{C}$

NMR (126 MHz,  $\text{CDCl}_3$ )  $\delta$  139.2, 138.9, 132.3, 127.7, 124.2,

123.1 (q,  $^1J_{F-C} = 277.2$  Hz), 118.4, 113.4, 112.6, 60.9 (q,  $^2J_{F-C} = 36.5$  Hz);  $^{19}\text{F}$  NMR (471 MHz,

$\text{CDCl}_3$ )  $\delta$  -73.7 (s, 9F); IR (KBr): 2967, 2229, 1608, 1421, 1281, 1169, 1092, 960, 848, 752, 688,

555  $\text{cm}^{-1}$ ; HRMS (APCI-QE, m/z):  $[\text{M}+\text{H}]^+$  Calcd. for  $\text{C}_{16}\text{H}_{12}\text{F}_9\text{NO}_3+\text{H}$ , 438.0746; found,

438.0745.

#### 1-(trifluoromethyl)-4-(3,3,3-tris(2,2,2-trifluoroethoxy)prop-1-en-2-yl)benzene (3p)

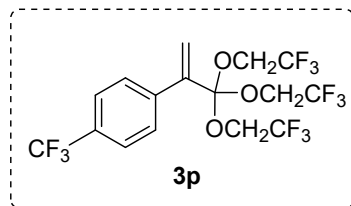

95.2 mg, 99% yield; yellow oil, eluting with EtOAc/PE = 1: 10;

$^1\text{H NMR}$  (500 MHz,  $\text{CDCl}_3$ )  $\delta$  7.70 (d,  $J = 8.3$  Hz, 2H), 7.63 (d,

$J = 8.3$  Hz, 2H), 6.04 (s, 1H), 5.98 (s, 1H), 3.90 (q,  $J = 8.2$  Hz,

6H);  $^{13}\text{C NMR}$  (126 MHz,  $\text{CDCl}_3$ )  $\delta$  139.1, 138.2, 130.9 (q,  $^2J_{F-C}$

= 37.8 Hz), 127.3, 125.5 (q,  $^3J_{F-C} = 3.8$  Hz), 123.9 (q,  $^1J_{F-C} = 272.3$  Hz), 123.6, 123.1 (q,  $^1J_{F-C} =$

277.2 Hz), 113.6, 60.9 (q,  $^2J_{F-C} = 36.5$  Hz);  $^{19}\text{F NMR}$  (471 MHz,  $\text{CDCl}_3$ )  $\delta$  -63.0 (s, 3F),  $\delta$  -73.8 (s,

9F); IR (KBr): 2977, 1421, 1329, 1286, 1169, 1078, 1019, 962, 850, 744, 696  $\text{cm}^{-1}$ ; HRMS

(APCI-QE, m/z):  $[\text{M}]^+$  Calcd. for  $\text{C}_{16}\text{H}_{12}\text{F}_{12}\text{O}_3$ , 480.0595; found, 480.0602.

### 3-(3,3,3-tris(2,2,2-trifluoroethoxy)prop-1-en-2-yl)benzo[b]thiophene (3q)

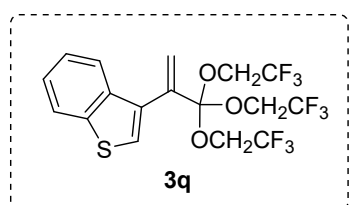

64.6 mg, 62% yield; white solid, mp: 63-64 °C, eluting with

EtOAc/PE = 1: 10;  $^1\text{H NMR}$  (400 MHz,  $\text{CDCl}_3$ )  $\delta$  7.95 (ddt,  $J =$

6.9, 2.8, 1.4 Hz, 2H), 7.75 (s, 1H), 7.53-7.39 (m, 2H), 6.25 (s,

1H), 6.12 (s, 1H), 3.95 (q,  $J = 8.3$  Hz, 6H);  $^{13}\text{C NMR}$  (101 MHz,

$\text{CDCl}_3$ )  $\delta$  140.3, 137.5, 134.5, 129.0, 126.0, 124.8, 124.7, 123.4, 123.3 (q,  $^1J_{F-C} = 277.8$  Hz), 123.2,

122.2, 113.7, 61.0 (q,  $^2J_{F-C} = 36.4$  Hz);  $^{19}\text{F NMR}$  (376 MHz,  $\text{CDCl}_3$ )  $\delta$  -73.6 (s, 9F); IR (KBr):

2959, 1420, 1283, 1167, 1101, 1072, 961, 855, 741  $\text{cm}^{-1}$ ; HRMS (APCI-QE, m/z):  $[\text{M}]^+$  Calcd. for

$\text{C}_{17}\text{H}_{13}\text{F}_9\text{O}_3\text{S}$ , 468.0442; found, 468.0437.

### 3-(3,3,3-tris(2,2,2-trifluoroethoxy)prop-1-en-2-yl)benzofuran (3r)

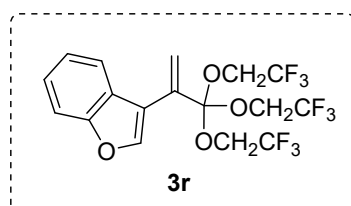

83.4 mg, 97% yield; yellow oil, eluting with EtOAc/PE = 1: 10;

$^1\text{H NMR}$  (500 MHz,  $\text{CDCl}_3$ )  $\delta$  7.60 (d,  $J = 7.8$  Hz, 1H), 7.47 (d,

$J = 8.2$  Hz, 1H), 7.34 (t,  $J = 7.8$  Hz, 1H), 7.24 (t,  $J = 7.5$  Hz,

1H), 7.11 (s, 1H), 6.47 (s, 1H), 6.05 (s, 1H), 3.90 (q,  $J = 8.2$  Hz,

6H);  $^{13}\text{C NMR}$  (126 MHz,  $\text{CDCl}_3$ )  $\delta$  154.7, 149.3, 130.5, 128.7, 125.8, 123.3, 123.2 (q,  $^1J_{F-C} =$

277.2 Hz), 122.1, 121.3, 112.7, 111.0, 106.8, 60.9 (q,  $^2J_{F-C} = 36.5$  Hz);  $^{19}\text{F NMR}$  (471 MHz,

$\text{CDCl}_3$ )  $\delta$  -73.7 (s, 9F); IR (KBr): 1627, 1421, 1285, 1169, 1100, 1019, 959, 851, 752, 689  $\text{cm}^{-1}$ ;

HRMS (APCI-QE, m/z):  $[\text{M}]^+$  Calcd. for  $\text{C}_{17}\text{H}_{13}\text{F}_9\text{O}_4$ , 452.0670; found, 452.0675.

### (E)-(3,3,3-tris(2,2,2-trifluoroethoxy)prop-1-ene-1,2-diyl)dibenzene (3s)

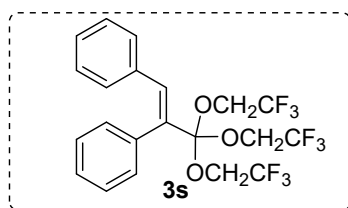

73.9 mg, 76% yield; yellow oil, eluting with EtOAc/PE = 1: 10;

$^1\text{H}$  NMR (500 MHz,  $\text{CDCl}_3$ )  $\delta$  7.33 (dd,  $J = 5.1, 2.1$  Hz, 3H),

7.24-7.13 (m, 5H), 7.08 (s, 1H), 7.02-6.97 (m, 2H), 3.99 (q,  $J =$

8.3 Hz, 6H);  $^{13}\text{C}$  NMR (126 MHz,  $\text{CDCl}_3$ )  $\delta$  134.4, 134.2, 134.0,

132.8, 130.0, 129.6, 128.8, 128.5, 128.4, 128.3, 123.3 (q,  $^1J_{F-C} = 277.2$  Hz), 114.1, 61.0 (q,  $^2J_{F-C} =$

36.5 Hz);  $^{19}\text{F}$  NMR (471 MHz,  $\text{CDCl}_3$ )  $\delta$  -73.6 (s, 9F), IR (KBr): 2921, 1419, 1285, 1231, 1167,

964, 850, 755, 702  $\text{cm}^{-1}$ ; HRMS (APCI-QE, m/z):  $[\text{M}]^+$  Calcd. for  $\text{C}_{21}\text{H}_{17}\text{F}_9\text{O}_3$ , 488.1034; found,

488.1039.

### (3-(tris(2,2,2-trifluoroethoxy)methyl)but-3-en-1-yn-1-yl)benzene (3u)

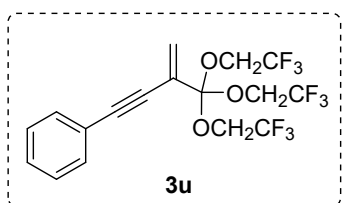

54.7 mg, 62% yield; yellow solid, mp: 46-47 °C, eluting with PE;

$^1\text{H}$  NMR (500 MHz,  $\text{CDCl}_3$ )  $\delta$  7.50-7.42 (m, 2H), 7.36 (d,  $J = 7.3$

Hz, 3H), 6.13 (s, 1H), 6.01 (s, 1H), 4.06 (q,  $J = 8.3$  Hz, 6H);  $^{13}\text{C}$

NMR (126 MHz,  $\text{CDCl}_3$ )  $\delta$  131.7, 129.3, 128.8, 128.5, 125.4,

123.3 (q,  $^1J_{F-C} = 277.2$  Hz), 121.8, 111.9, 92.9, 83.6, 61.3 (q,  $^2J_{F-C} = 36.5$  Hz);  $^{19}\text{F}$  NMR (471

MHz,  $\text{CDCl}_3$ )  $\delta$  -73.9 (s, 9F), IR (KBr): 2919, 1649, 1421, 1287, 1172, 1113, 961, 851, 756, 690,

642  $\text{cm}^{-1}$ ; HRMS (APCI-QE, m/z):  $[\text{M}+\text{H}]^+$  Calcd. for  $\text{C}_{17}\text{H}_{13}\text{F}_9\text{O}_3+\text{H}$ , 437.0794; found,

437.0795.

### 2-(tris(2,2,2-trifluoroethoxy)methyl)but-1-en-3-yne (3v')

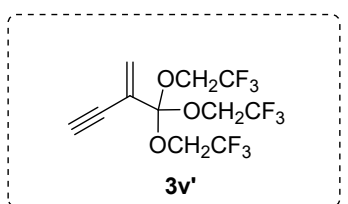

51.4 mg, 70% yield; yellow oil, eluting with EtOAc/PE = 1: 10;

$^1\text{H}$  NMR (500 MHz,  $\text{CDCl}_3$ )  $\delta$  6.17 (s, 1H), 6.04 (s, 1H), 4.01 (q,

$J = 8.3$  Hz, 6H), 3.10 (s, 1H);  $^{13}\text{C}$  NMR (126 MHz,  $\text{CDCl}_3$ )  $\delta$

131.1, 124.7, 123.2 (q,  $^1J_{F-C} = 277.2$  Hz), 111.6, 81.2, 78.1, 61.3

(q,  $^2J_{F-C} = 36.5$  Hz);  $^{19}\text{F}$  NMR (471 MHz,  $\text{CDCl}_3$ )  $\delta$  -74.0 (s, 9F), IR (KBr): 2979, 2890, 2318,

1763, 1425, 1289, 1184, 963, 755, 688, 755, 688, 443  $\text{cm}^{-1}$ ; HRMS (APCI-QE, m/z):  $[\text{M}-\text{H}]^-$

Calcd. for  $\text{C}_{11}\text{H}_9\text{F}_9\text{O}_3-\text{H}$ , 359.0335; found, 359.0335.

**(3,3,3-tris(2,2,3,3,3-pentafluoropropoxy)prop-1-en-2-yl)benzene (3y)**

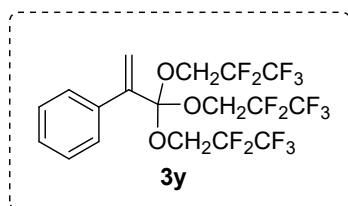

103.6 mg, 71% yield; yellow oil, eluting with EtOAc/PE = 1: 10;

$^1\text{H}$  NMR (500 MHz,  $\text{CDCl}_3$ )  $\delta$  7.53 (dd,  $J = 6.4, 3.1$  Hz, 2H),

7.40-7.31 (m, 3H), 5.95 (s, 1H), 5.83 (s, 1H), 3.93 (t,  $J = 12.8$

Hz, 6H);  $^{13}\text{C}$  NMR (126 MHz,  $\text{CDCl}_3$ )  $\delta$  139.8, 134.6, 128.9,

128.6, 126.9, 122.0, 118.4 (qt,  $J = 286.0$  Hz,  $J = 35.3$  Hz), 113.9, 112.4 (tq,  $J = 254.5$  Hz,  $J = 37.8$

Hz), 59.8 (t,  $J = 27.7$  Hz);  $^{19}\text{F}$  NMR (471 MHz,  $\text{CDCl}_3$ )  $\delta$  -83.8 (s, 3F),  $\delta$  -123.4 (s, 2F); IR (KBr):

2962, 1363, 1206, 1110, 1057, 945, 755, 521  $\text{cm}^{-1}$ ; HRMS (APCI-QE,  $m/z$ ):  $[\text{M}+\text{H}]^+$  Calcd. for

$\text{C}_{18}\text{H}_{13}\text{F}_{15}\text{O}_3+\text{H}$ , 563.0698; found, 563.0695.

**(3,3,3-tris(2,2,3,3-tetrafluoropropoxy)prop-1-en-2-yl)benzene (3z)**

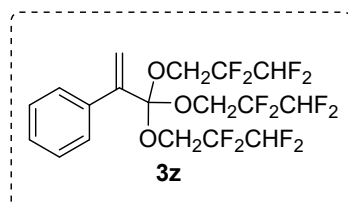

81.8 mg, 77% yield; colorless oil, eluting with EtOAc/PE = 1:

10;  $^1\text{H}$  NMR (500 MHz,  $\text{CDCl}_3$ )  $\delta$  7.45-7.40 (m, 2H), 7.30-7.26

(m, 3H), 5.87-5.60 (m, 5H), 3.79 (t,  $J = 12.5$  Hz, 6H);  $^{13}\text{C}$  NMR

(126 MHz,  $\text{CDCl}_3$ )  $\delta$  140.0, 135.0, 128.9, 128.5, 126.9, 122.1,

114.5 (tt,  $J = 249.5$  Hz,  $J = 27.7$  Hz), 113.8, 109.1 (tt,  $J = 250.7$  Hz,  $J = 35.3$  Hz), 60.0 (t,  $J = 30.2$

Hz);  $^{19}\text{F}$  NMR (471 MHz,  $\text{CDCl}_3$ )  $\delta$  -124.0 (t,  $J = 3.7$  Hz, 2F), -138.4 --138.4 (m, 2F); IR (KBr):

2962, 1409, 1179, 1107, 943, 837, 779, 702, 546  $\text{cm}^{-1}$ ; HRMS (APCI-QE,  $m/z$ ):  $[\text{M}-\text{H}]^-$  Calcd. for

$\text{C}_{18}\text{H}_{16}\text{F}_{12}\text{O}_3-\text{H}$ , 507.0835; found, 507.0832.

**(3,3,3-tris((2,2,3,3,4,4,5,5-octafluoropentyl)oxy)prop-1-en-2-yl)benzene (3aa)**

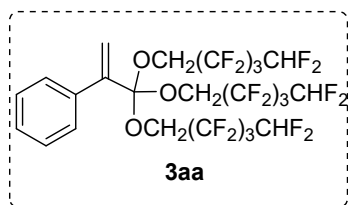

94.6 mg, 57% yield; yellow oil, eluting with EtOAc/PE = 1: 10;

$^1\text{H}$  NMR (500 MHz,  $\text{CDCl}_3$ )  $\delta$  7.45 (dd,  $J = 6.8, 3.0$  Hz, 2H),

7.31-7.24 (m, 3H), 6.06-5.72 (m, 5H), 3.91 (t,  $J = 13.6$  Hz, 6H);

$^{13}\text{C}$  NMR (126 MHz,  $\text{CDCl}_3$ )  $\delta$  139.0, 133.8, 127.9, 127.5, 126.0,

121.1, 113.1, 116.2-104.3 (complex signal, 4C), 59.0 (t,  $J = 26.5$  Hz);  $^{19}\text{F}$  NMR (471 MHz,  $\text{CDCl}_3$ )

$\delta$  -119.7 (t,  $J = 10.8$  Hz, 2F), -125.3 (d,  $J = 8.8$  Hz, 2F), -130.2 (d,  $J = 6.0$  Hz, 2F), -137.4 (d,  $J =$

8.4 Hz, 2F); IR (KBr): 2967, 1405, 1266, 1174, 1126, 904, 756, 539  $\text{cm}^{-1}$ ; HRMS (APCI-QE,

$m/z$ ):  $[\text{M}-\text{H}]^-$  Calcd. for  $\text{C}_{24}\text{H}_{16}\text{F}_{24}\text{O}_3-\text{H}$ , 807.0643; found, 807.0648.

### (3,3,3-tris((2,2,3,3,4,4,5,5,6,6,7,7,8,8,8-pentadecafluorooctyl)oxy)prop-1-en-2-yl)benzene

#### (3ab)

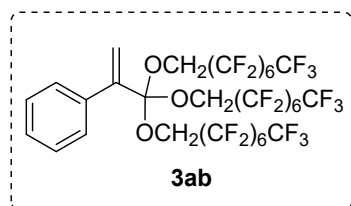

186.2 mg, 68% yield; colorless oil, eluting with EtOAc/PE = 1: 10; <sup>1</sup>H NMR (500 MHz, CDCl<sub>3</sub>) δ 7.52 (dd, *J* = 6.7, 2.9 Hz, 2H), 7.39-7.28 (m, 3H), 5.93 (s, 1H), 5.82 (s, 1H), 3.99 (t, *J* = 13.3 Hz, 6H); <sup>13</sup>C NMR (126 MHz, CDCl<sub>3</sub>) δ 140.0, 134.7, 128.9, 128.5, 127.0, 121.8, 114.1, 118.3-108.2 (complex signal, 7C), 60.2 (t, *J* = 26.5 Hz); <sup>19</sup>F NMR (471 MHz, CDCl<sub>3</sub>) δ -81.2 (t, *J* = 10.0 Hz, 3F), -119.6 (t, *J* = 13.2 Hz, 2F), -122.2--122.3 (m, 4F), -122.9--123.0 (m, 2F), -123.4--123.5 (m, 2F), -126.3--126.4 (m, 2F); IR (KBr): 2964, 2905, 2430, 1895, 1458, 1407, 1205, 1026, 953, 890, 784, 710, 650, 568, 529 cm<sup>-1</sup>; HRMS (APCI-QE, *m/z*): [M+H]<sup>+</sup> Calcd. for C<sub>33</sub>H<sub>13</sub>F<sub>45</sub>O<sub>3</sub>+H, 1313.0219; found, 1313.0214.

### 2-(3,3,3-tris(2,2-difluoroethoxy)prop-1-en-2-yl)naphthalene (3af)

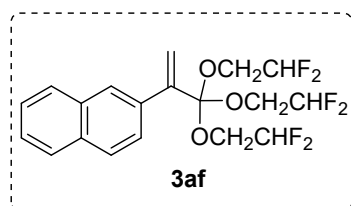

78.0 mg, 96% yield; yellow oil, yellow oil, eluting with EtOAc/PE = 1: 20; <sup>1</sup>H NMR (500 MHz, CDCl<sub>3</sub>) δ 8.04 (d, *J* = 1.9 Hz, 1H), 7.82-7.67 (m, 3H), 7.59 (dd, *J* = 8.7, 1.9 Hz, 1H), 7.41 (dt, *J* = 6.3, 3.5 Hz, 2H), 5.97 (s, 1H), 5.90 (s, 1H), 5.76 (tt, *J* = 55.1, 4.0 Hz, 3H), 3.65 (td, *J* = 13.8, 4.0 Hz, 6H); <sup>13</sup>C NMR (126 MHz, CDCl<sub>3</sub>) δ 140.6, 133.2, 133.2, 132.7, 128.6, 128.2, 127.5, 126.7, 126.5, 126.4, 124.6, 122.4, 114.0, 113.6 (t, <sup>1</sup>*J*<sub>F-C</sub> = 240.7 Hz), 62.2 (t, <sup>2</sup>*J*<sub>F-C</sub> = 29.0 Hz); <sup>19</sup>F NMR (471 MHz, CDCl<sub>3</sub>) δ -125.0 (s, 6F); IR (KBr): 2986, 1629, 1419, 1267, 1085, 940, 900, 822, 755, 478 cm<sup>-1</sup>; HRMS (APCI-QE, *m/z*): [M+H]<sup>+</sup> Calcd. for C<sub>19</sub>H<sub>18</sub>F<sub>6</sub>O<sub>3</sub>+H, 409.1233; found, 409.1237.

### methyl 2-(naphthalen-2-yl)acrylate (3ah')<sup>5</sup>

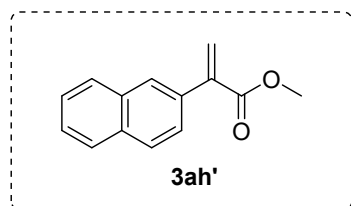

28.5 mg, 67% yield; yellow oil, eluting with EtOAc/PE = 1: 20; <sup>1</sup>H NMR (500 MHz, CDCl<sub>3</sub>) δ 7.86-7.79 (m, 1H), 7.79-7.70 (m, 3H), 7.47-7.36 (m, 3H), 6.36 (d, *J* = 1.3 Hz, 1H), 5.93 (d, *J* = 1.2 Hz, 1H), 3.77 (s, 3H).

### ethyl 2-(naphthalen-2-yl)acrylate (**3ai'**)<sup>6</sup>

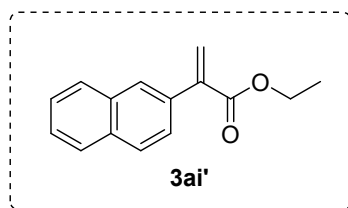

43.9 mg, 95% yield; yellow oil, eluting with EtOAc/PE = 1: 20;

<sup>1</sup>H NMR (500 MHz, CDCl<sub>3</sub>) δ 7.82 (d, *J* = 1.9 Hz, 1H), 7.74 (td, *J* = 8.8, 4.7 Hz, 3H), 7.44 (dd, *J* = 8.6, 1.8 Hz, 1H), 7.41-7.34 (m, 2H), 6.33 (d, *J* = 1.4 Hz, 1H), 5.91 (d, *J* = 1.4 Hz, 1H), 4.31-

4.17 (m, 2H), 1.25 (td, *J* = 7.1, 1.5 Hz, 3H).

### 1-methoxy-4-(3,3,3-tris(2,2,2-trifluoroethoxy)prop-1-en-2-yl)benzene (**3aj**)

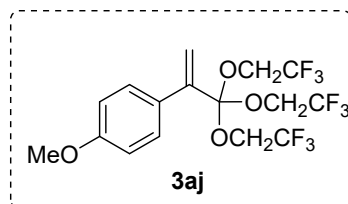

25.2 mg, 25% yield; yellow oil, eluting with PE; <sup>1</sup>H NMR (500

MHz, CDCl<sub>3</sub>) δ 7.47 (d, *J* = 8.6 Hz, 2H), 6.82 (d, *J* = 8.6 Hz, 2H), 5.83 (s, 1H), 5.76 (s, 1H), 3.79 (m, 9H); <sup>13</sup>C NMR (126

MHz, CDCl<sub>3</sub>) δ 160.2, 139.0, 128.1, 126.7, 123.3 (q, <sup>1</sup>*J*<sub>F-C</sub> = 277.2 Hz), 120.5, 114.0, 113.9, 60.8 (q, <sup>2</sup>*J*<sub>F-C</sub> = 36.5 Hz), 55.3; <sup>19</sup>F NMR (376 MHz, CDCl<sub>3</sub>) δ -73.7 (s, 9F); IR (KBr): 2920, 1642, 1389, 1271, 1170, 1095, 755 cm<sup>-1</sup>; HRMS (APCI-QE, m/z): [M]<sup>+</sup> Calcd. for C<sub>16</sub>H<sub>15</sub>F<sub>9</sub>O<sub>4</sub>, 442.0827; found, 442.0822.

### 1-(3,3-difluoro-3-(2,2,2-trifluoroethoxy)prop-1-en-2-yl)-4-methoxybenzene (**3aj'**)

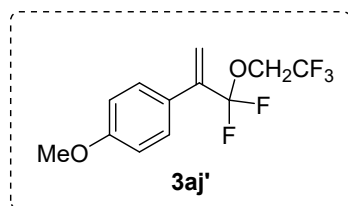

4.1 mg, 6% yield; yellow oil, eluting with PE; <sup>1</sup>H NMR (500

MHz, CDCl<sub>3</sub>) δ 7.38-7.27 (m, 2H), 6.88-6.73 (m, 2H), 5.76 (d, *J* = 1.3 Hz, 1H), 5.54 (t, *J* = 1.6 Hz, 1H), 4.21 (q, *J* = 8.2 Hz, 2H), 3.74 (s, 3H); <sup>13</sup>C NMR (126 MHz, CDCl<sub>3</sub>) δ 159.9, 139.9 (t, <sup>2</sup>*J*<sub>F-C</sub>

= 29.0 Hz), 128.8, 127.2, 122.8 (q, <sup>1</sup>*J*<sub>F-C</sub> = 277.2 Hz), 121.9 (t, <sup>1</sup>*J*<sub>F-C</sub> = 264.6 Hz), 118.5 (t, <sup>3</sup>*J*<sub>F-C</sub> = 6.3 Hz), 113.7, 60.8 (qt, *J* = 36.5 Hz, 6.3 Hz), 55.3; <sup>19</sup>F NMR (471 MHz, CDCl<sub>3</sub>) δ -72.5 (s, 2F), -74.2 (s, 3F); <sup>1</sup>IR (KBr): 2922, 2855, 1611, 1516, 1427, 1291, 1174, 1041, 952, 837, 752, 655, 534 cm<sup>-1</sup>; HRMS (APCI-QE, m/z): [M+H]<sup>+</sup> Calcd. for C<sub>12</sub>H<sub>12</sub>F<sub>5</sub>O<sub>2</sub>+H, 283.0752; found, 283.0746.

### 2,2,2-trifluoroethyl 2-(4-methoxyphenyl)acrylate (**3aj''**)

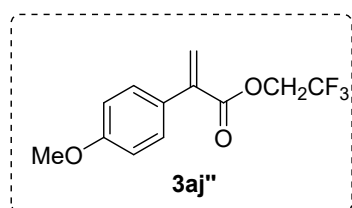

24.0 mg, 46% yield; yellow oil, eluting with PE;  $^1\text{H}$  NMR (400 MHz,  $\text{CDCl}_3$ )  $\delta$  7.39 (d,  $J = 8.9$  Hz, 2H), 6.93 (d,  $J = 8.8$  Hz, 2H), 6.42 (d,  $J = 0.9$  Hz, 1H), 6.01 (d,  $J = 0.9$  Hz, 1H), 4.63 (q,  $J = 8.4$  Hz, 2H), 3.85 (s, 3H);  $^{13}\text{C}$  NMR (126 MHz,  $\text{CDCl}_3$ )  $\delta$  165.2, 159.9, 139.1, 129.5, 128.3, 127.4, 123.0 (q,  $^1J_{\text{F-C}} = 277.2$  Hz), 113.7, 60.8 (q,  $^2J_{\text{F-C}} = 36.5$  Hz), 55.3;  $^{19}\text{F}$  NMR (376 MHz,  $\text{CDCl}_3$ )  $\delta$  -73.6 (s, 3F); IR (KBr): 1738, 1608, 1511, 1408, 1284, 1164, 1092, 1032, 966, 914, 833, 743, 659  $\text{cm}^{-1}$ ; HRMS (APCI-QE,  $m/z$ ):  $[\text{M}+\text{H}]^+$  Calcd. for  $\text{C}_{12}\text{H}_{11}\text{F}_3\text{O}_3+\text{H}$ , 261.0733; found, 261.0729.

### 5) General Procedure for Gram-Scale Synthesis

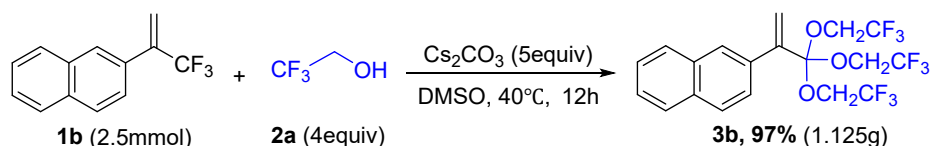

To a 100 mL Schlenk flask was charged with alkenes **1b** (2.5 mmol, 1.0 equiv), fluoroalkylated alcohols (10 mmol, 4.0 equiv),  $\text{Cs}_2\text{CO}_3$  (12.5 mmol, 5.0 equiv) and a solvent of DMSO (25 mL). The resulting solution was stirred at 40 °C for 12 h. Upon completion of the reaction,  $\text{H}_2\text{O}$  (50 mL) was added, and extracted with EtOAc (50 mL  $\times$  3). The combined organic layer was dried over anhydrous  $\text{Na}_2\text{SO}_4$ , filtered and concentrated in *vacuo*. The residue was purified by column chromatography on silica gel to afford fluoroalkylated orthoester product **3b** (97% yield, 1.125 g).

### 6) General Procedure for Further Derivatization of the Obtained Fluoroalkylated orthoesters

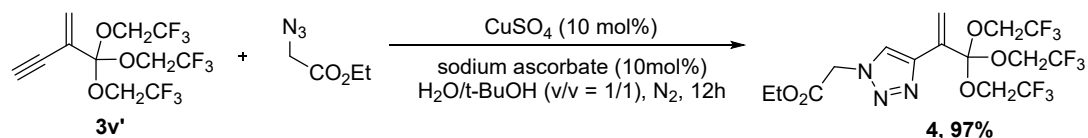

A 25 mL oven-dried Schlenk tube equipped with a magnetic stirring bar, **3v'** (72.0 mg, 0.2 mmol) and azidoacetic acid ethyl ester (51.6 mg, 0.4 mmol) were dissolved in 2 mL of a 1:1 water/tert-butanol mixture. Sodium ascorbate (4.0 mg, 0.02 mmol, 200  $\mu\text{L}$  of freshly prepared 0.1 M solution in water) and copper(II) sulfate pentahydrate (3.2 mg, 0.02 mmol, 200  $\mu\text{L}$  of freshly

prepared 0.1 M solution in water) were added. The mixture was vigorously stirred at 60 °C for 12 h. Then the mixture was stopped stirring, added water (15 mL), extracted with EtOAc (15 mL × 3). The combined organic layer was dried over anhydrous Na<sub>2</sub>SO<sub>4</sub>, filtered and concentrated in vacuo. Further purification by flash column chromatography on silica gel (eluting with petroleum ether/ethyl acetate = 1:5) provided product **4** in 97% isolated yield.

**ethyl 2-(4-(3,3,3-tris(2,2,2-trifluoroethoxy)prop-1-en-2-yl)-1H-1,2,3-triazol-1-yl)acetate (4)**

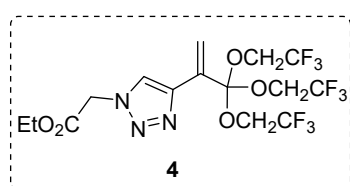

109.1 mg, 97% yield; colorless oil, eluting with PE; <sup>1</sup>H NMR (500 MHz, CDCl<sub>3</sub>) δ 7.87 (s, 1H), 6.77 (s, 1H), 6.00 (s, 1H), 5.18 (s, 2H), 4.26 (q, *J* = 7.2 Hz, 2H), 3.87 (q, *J* = 8.3 Hz, 6H), 1.28 (t, *J* = 7.2 Hz, 3H); <sup>13</sup>C NMR (126 MHz, CDCl<sub>3</sub>) δ 165.8, 141.0, 129.9, 123.6, 123.1 (q, <sup>1</sup>*J*<sub>F-C</sub> = 277.2 Hz), 121.6, 113.1, 62.5, 60.8 (q, <sup>2</sup>*J*<sub>F-C</sub> = 36.5 Hz), 51.0, 13.9; <sup>19</sup>F NMR (471 MHz, CDCl<sub>3</sub>) δ -73.8 (s, 9F); IR (KBr): 2975, 1751, 1424, 1286, 1172, 1096, 960, 855, 749, 692, 620 cm<sup>-1</sup>; HRMS (APCI-QE, *m/z*): [M+H]<sup>+</sup> Calcd. for C<sub>15</sub>H<sub>16</sub>F<sub>9</sub>N<sub>3</sub>O<sub>5</sub>+H, 490.1019; found, 490.1019.

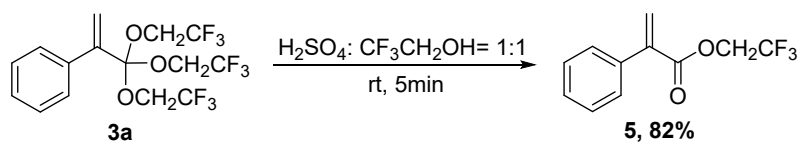

**3a** (82.5 mg, 0.2 mmol) was added into a 10 mL Schlenk tube. Then 2.5 mL ethyl acetate and 2.5 ml 2,2,2-Trifluoroethanol were added. Then H<sub>2</sub>SO<sub>4</sub> solution (2.5 ml) was added. The mixture was stirred for 5 min. The combined organic layers were washed with saturated NaHCO<sub>3</sub> and brine, dried over anhydrous Na<sub>2</sub>SO<sub>4</sub>, filtered and concentrated to give the **5**. The residue was purified by flash column chromatography over silica gel using petroleum ether/ethyl acetate (1:10), providing product **5** in 82% isolated yield.

**2,2,2-trifluoroethyl 2-phenylacrylate (5)**<sup>7</sup>



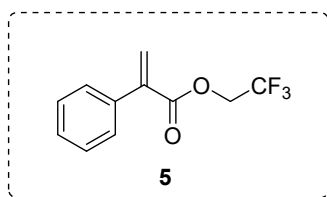

37.5 mg, 82% yield; yellow oil, eluting with PE;  $^1\text{H}$  NMR (500 MHz,  $\text{CDCl}_3$ )  $\delta$  7.49-7.33 (m, 5H), 6.48 (s, 1H), 6.04 (s, 1H), 4.61 (q,  $J = 8.4$  Hz, 2H);  $^{19}\text{F}$  NMR (471 MHz,  $\text{CDCl}_3$ )  $\delta$  -73.6 (s, 9F).

## 7) Control Experiments

To a 25 mL Schlenk flask was charged with alkenes **1b** (0.2 mmol, 1.0 equiv), **1x** (0.8 mmol, 4.0 equiv),  $\text{Cs}_2\text{CO}_3$  (1.0 mmol, 5.0 equiv), and a solvent of DMSO (2.0 mL). The resulting solution was stirred at 40 °C for 12 h. Then the mixture was cooled to room temperature, quenched with  $\text{H}_2\text{O}$  (15 mL), extracted with EtOAc (15 mL  $\times$  3). The combined organic layer was dried over anhydrous  $\text{Na}_2\text{SO}_4$ , filtered and concentrated in vacuo. The yield was determined by  $^{19}\text{F}$  NMR spectroscopy of the crude product.

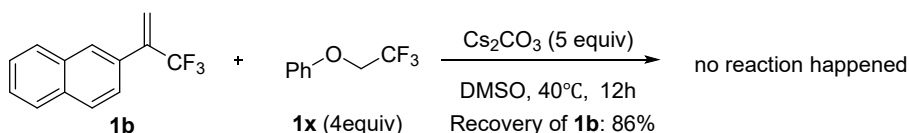

## Typical Procedure for Radical Trapping Experiment:

To a 25 mL Schlenk flask was charged with alkenes **1b** (0.2 mmol, 1.0 equiv), fluoroalkylated alcohols (0.8 mmol, 4.0 equiv),  $\text{Cs}_2\text{CO}_3$  (1.0 mmol, 5.0 equiv), **additives** (0.4 mmol, 2.0 equiv) and a solvent of DMSO (2.0 mL). The resulting solution was stirred at 40 °C for 12 h. Then the mixture was cooled to room temperature, quenched with  $\text{H}_2\text{O}$  (15 mL), extracted with EtOAc (15 mL  $\times$  3). The combined organic layer was dried over anhydrous  $\text{Na}_2\text{SO}_4$ , filtered and concentrated in vacuo. Further purification by flash column chromatography on silica gel provided the products **3b**.

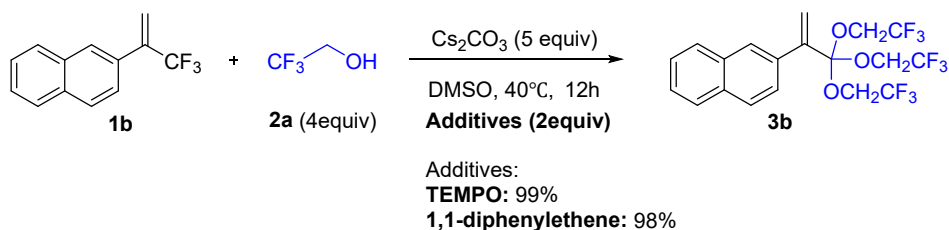

The reaction between **1a** and **2a** in  $\text{DMSO}-d_6$  monitored by  $^{19}\text{F}$  NMR:

To an oven-dried NMR tube was added **1a** (0.06 mmol, 1.0 equiv), **2a** (0.22 mmol, 4.0 equiv), Cs<sub>2</sub>CO<sub>3</sub> (0.28 mmol, 5.0 equiv), and a solvent of DMSO-*d*<sub>6</sub> (0.55 mL). The resulting solution was stirred at room temperature. Then the reaction mixture was monitored by <sup>19</sup>F NMR in different time. We tried different reaction concentrations, and this is the best set of spectra we have ever had. However, the peaks of **3a**<sup>78</sup> were not detected.

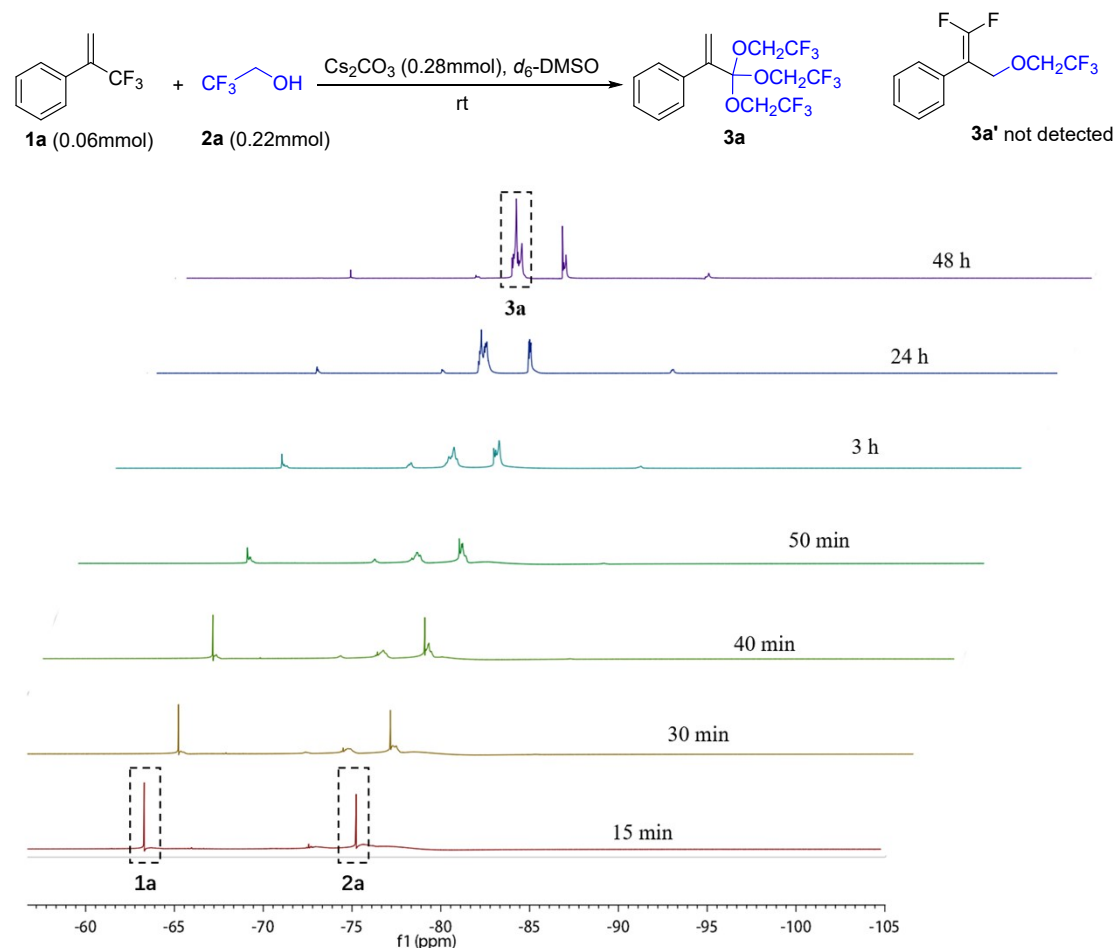

**Figure 1**

## C. References

- [1] Lan, Y.; Yang, F. Y.; and Wang, C. *ACS Catal.* 2018, **8**, 9245-9251.
- [2] Zhang, C. X.; Li, D.; Zhao, Y. L.; Zhao, J. F.; Qu, J. P.; and Zhou, Y. H. *ChemistrySelect.* 2020, **5**, 13099-13102.
- [3] Chen, S. J.; Zhang, J. H.; Yang, M. F.; Liu, F. G.; Xie, Z. P.; Liu, Y. L.; Lin, W. X.; Wang, D. R.; Li, X. R.; and Wang, J. H. *Chem. Commun.* 2019, **55**, 3879-3882.
- [4] Güell, I. and Ribas, X. *Eur. J. Org. Chem.* 2014, **15**, 3188-3195.
- [5] Kohsaka, Y.; Yamaguchi, E.; and Kitayama, T. *Polymer Chemistry.* 2014, **52**, 2806-2814.
- [6] Gualandi, A.; Mazzarella, D.; Martinez, A. O.; Mengozzi, L.; Calcinelli, F.; Matteucci, E.; Monti, F.; Armaroli, N.; Sambri, L.; and Cozzi, P. G. *ACS Catal.* 2017, **7**, 5357-5362.
- [7] Dai, D. T.; Xu, J. L.; Chen, Z. Y.; Wang, Z. L.; Xu, Y. H. *Org. Lett.* 2021, **23**, 1898-1903.

[8] Cai, Y. Y.; Zeng, H.; Zhu, C. L.; Liu, C.; Liu, G. Y.; and Jiang, H. F. *Org. Chem. Front.* 2020, 7, 1260-1265.

## D. NMR Spectra of Compounds

### <sup>1</sup>H NMR (500 MHz, CDCl<sub>3</sub>) spectrum for 3a

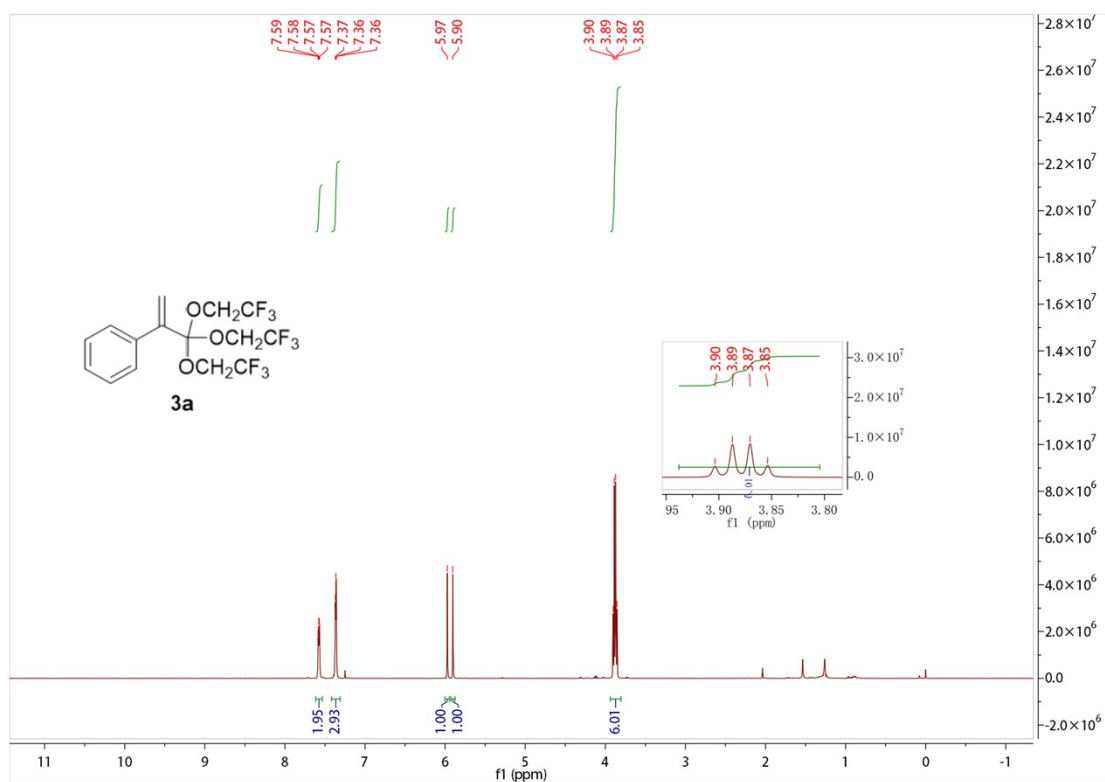

### <sup>13</sup>C NMR (126 MHz, CDCl<sub>3</sub>) spectrum for 3a

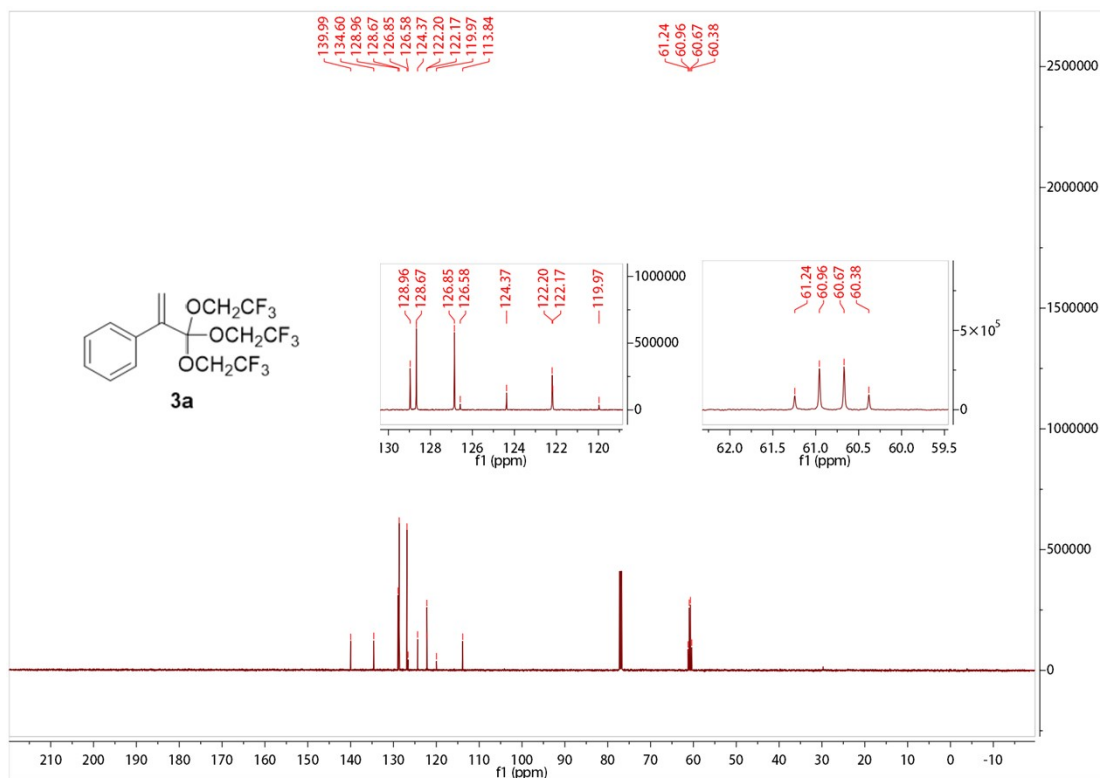

**<sup>19</sup>F NMR (471 MHz, CDCl<sub>3</sub>) spectrum for 3a**

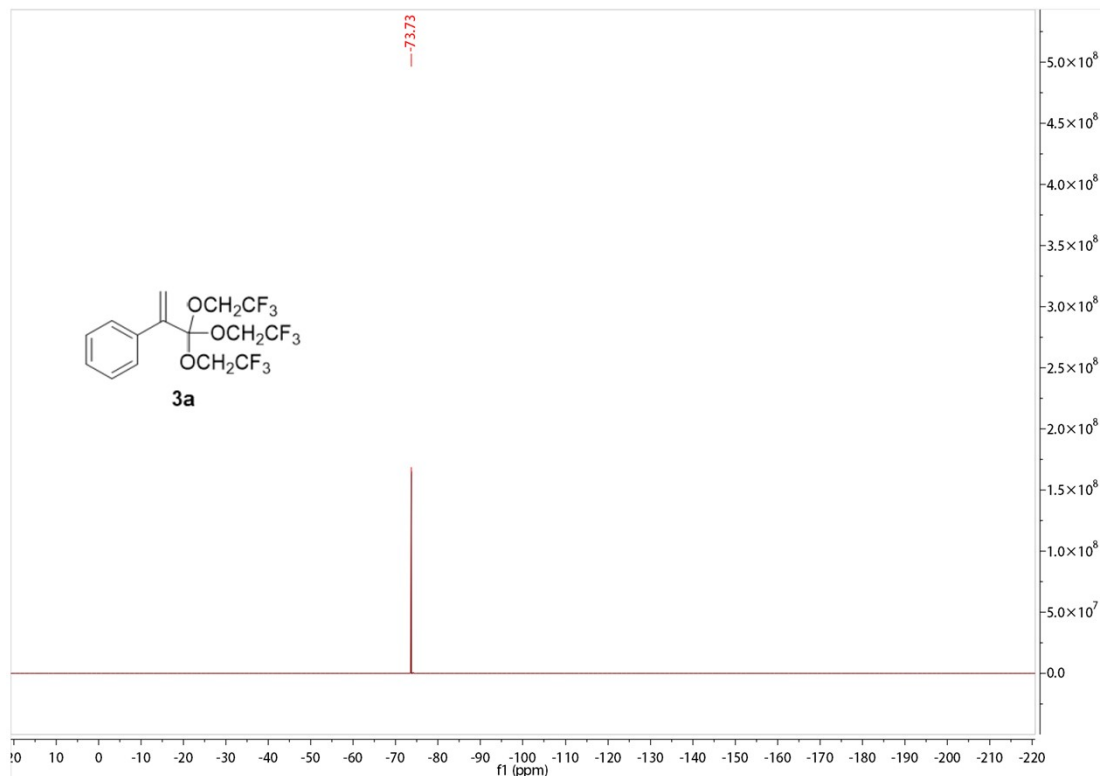

**<sup>1</sup>H NMR (400 MHz, CDCl<sub>3</sub>) spectrum for 3b**

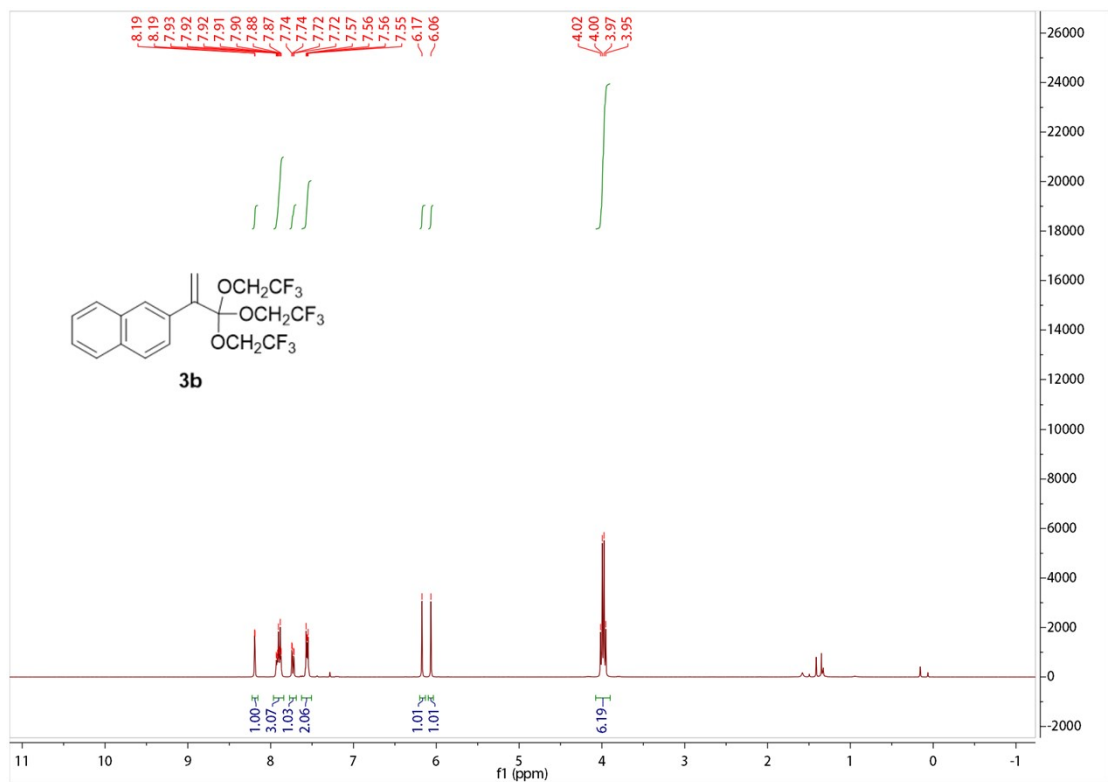

**<sup>13</sup>C NMR (101 MHz, CDCl<sub>3</sub>) spectrum for 3b**

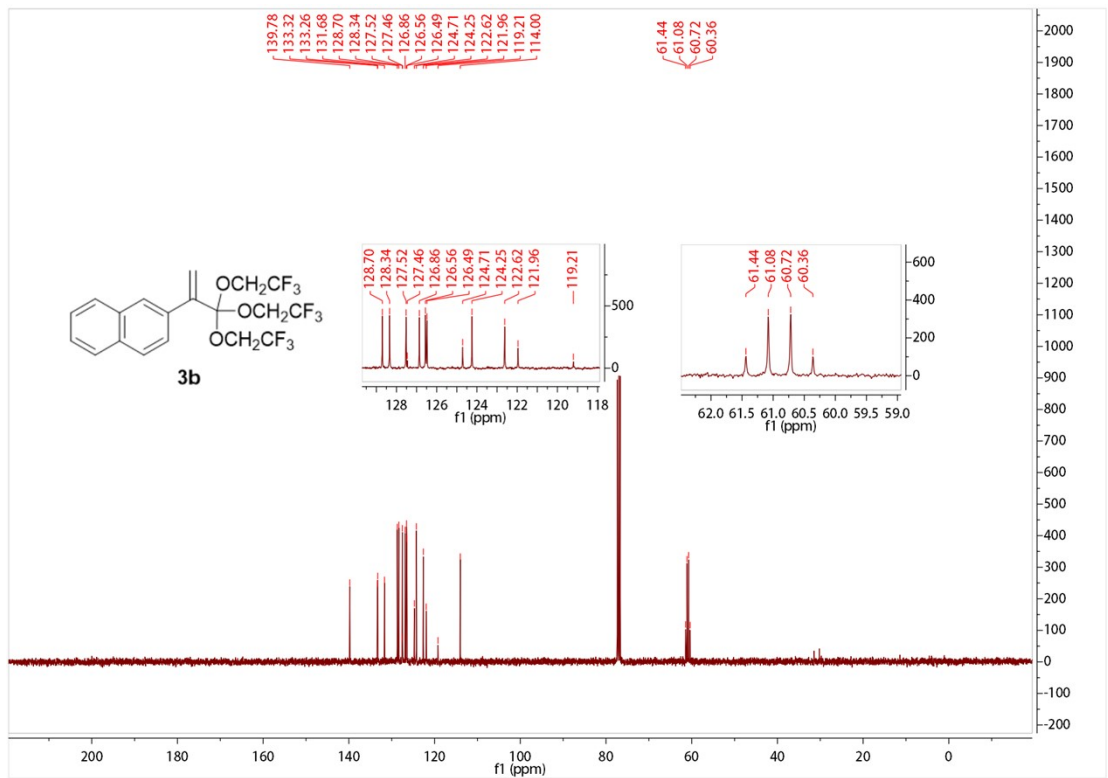

**<sup>19</sup>F NMR (376 MHz, CDCl<sub>3</sub>) spectrum for 3b**

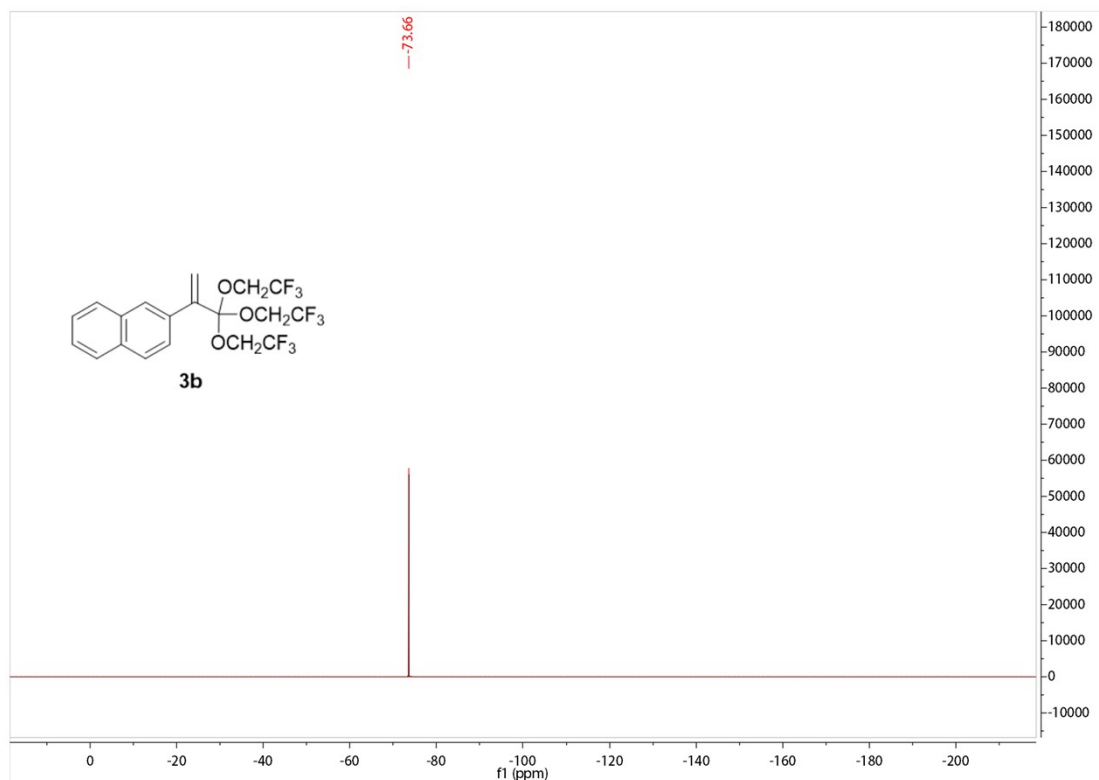

$^1\text{H}$  NMR (400 MHz,  $\text{CDCl}_3$ ) spectrum for **3c**

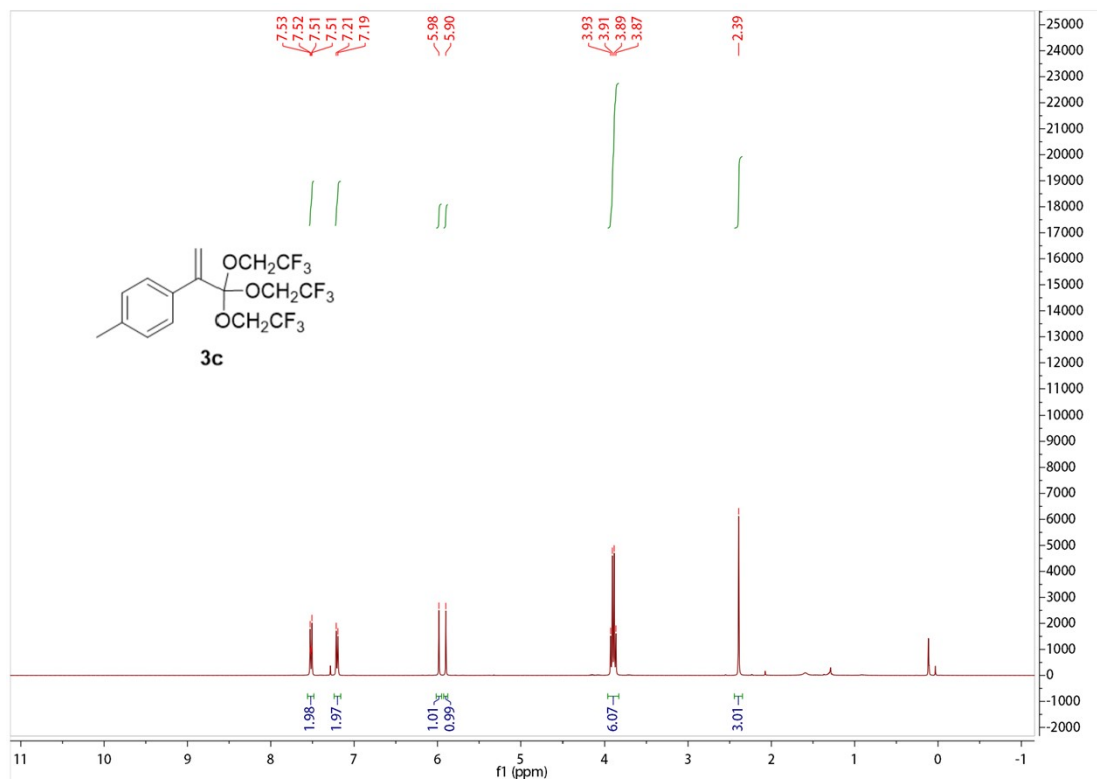

$^{13}\text{C}$  NMR (126 MHz,  $\text{CDCl}_3$ ) spectrum for **3c**

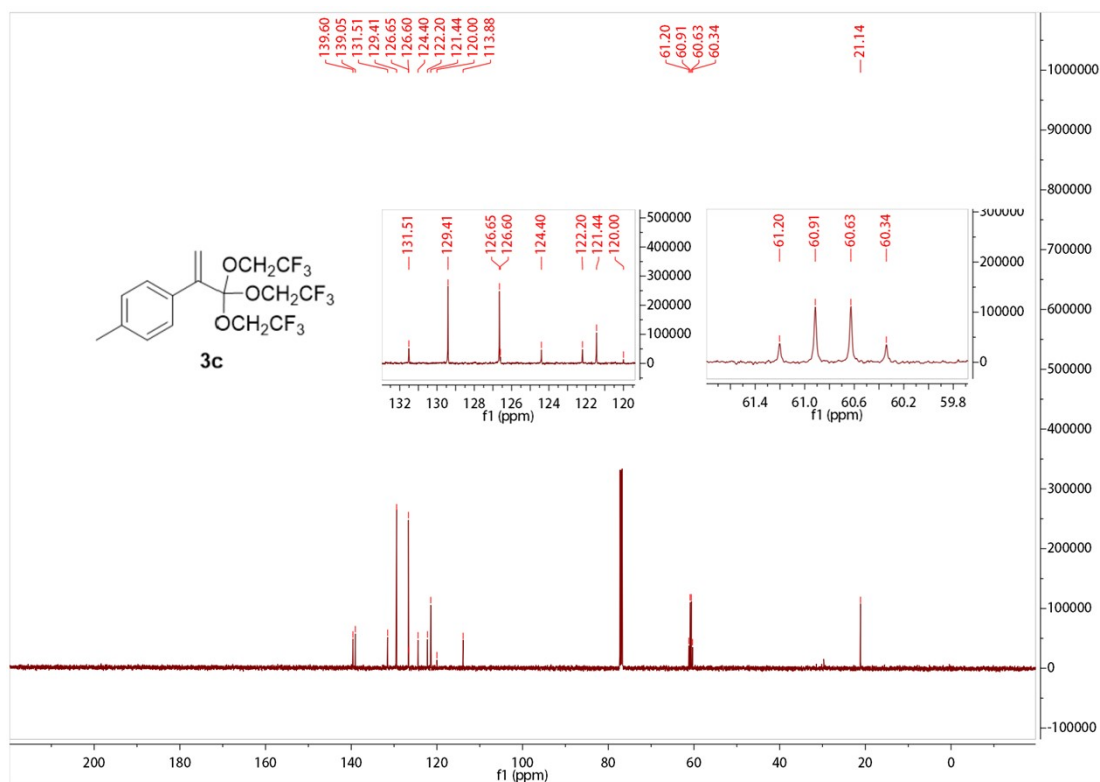

**<sup>19</sup>F NMR (471 MHz, CDCl<sub>3</sub>) spectrum for 3c**

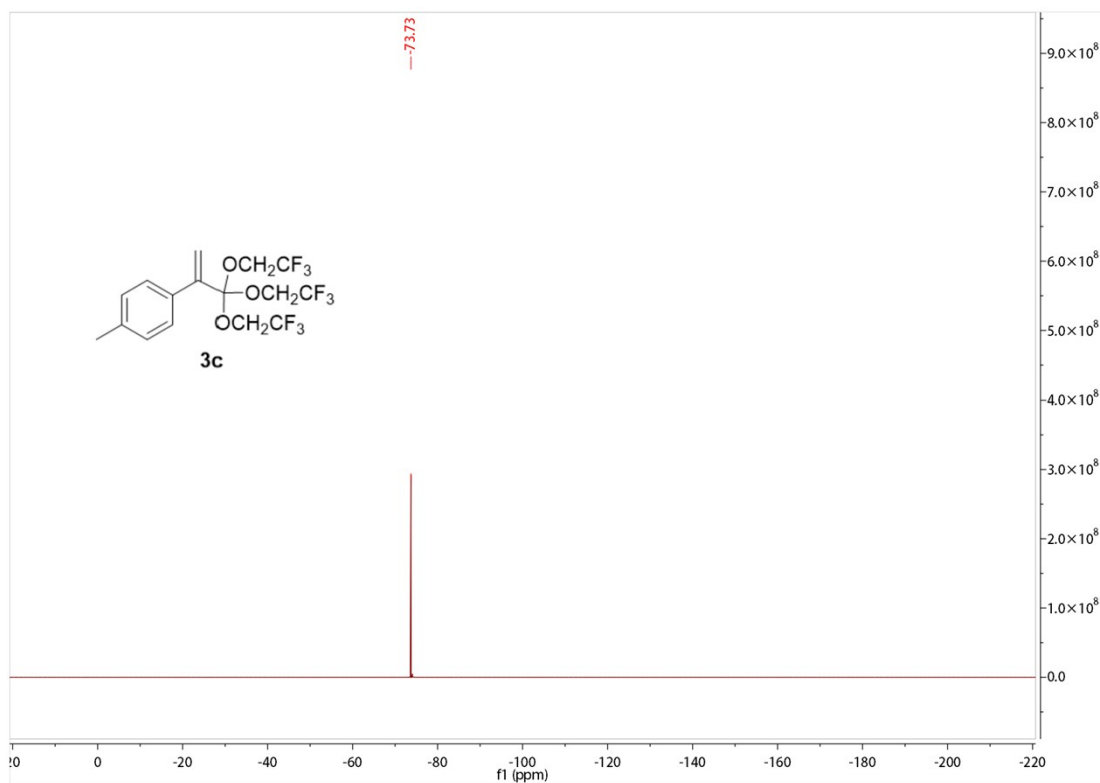

**<sup>1</sup>H NMR (500 MHz, CDCl<sub>3</sub>) spectrum for 3d**

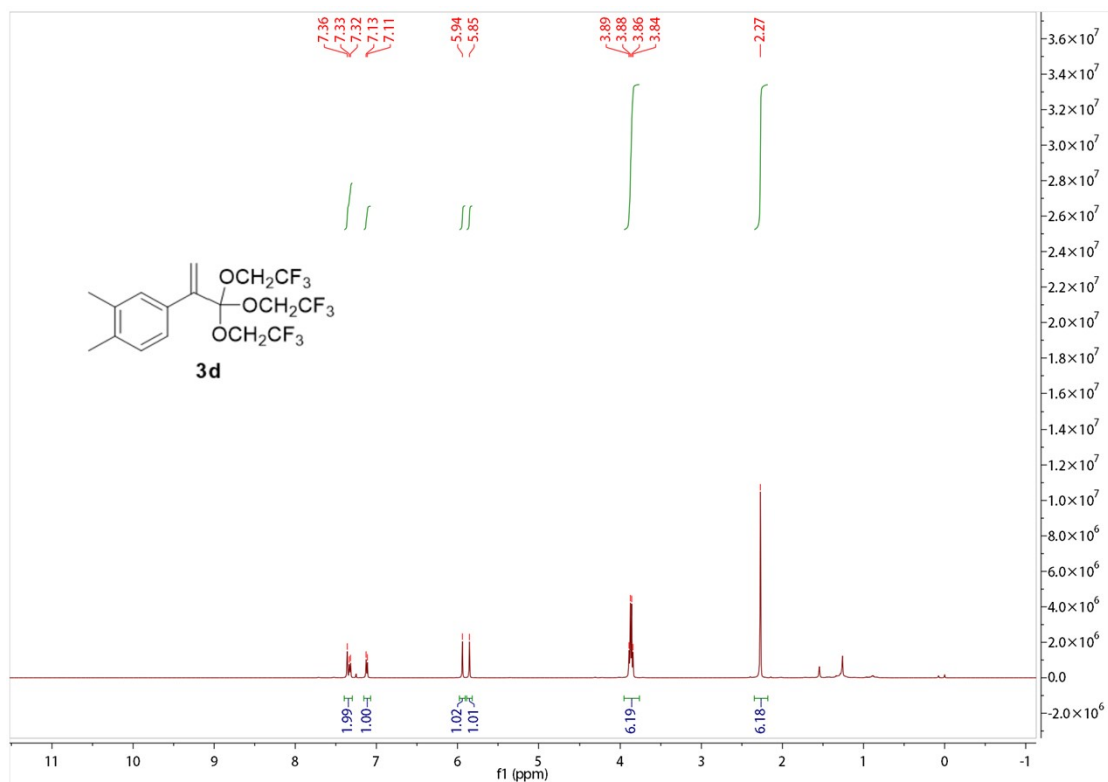

**<sup>13</sup>C NMR (126 MHz, CDCl<sub>3</sub>) spectrum for 3d**

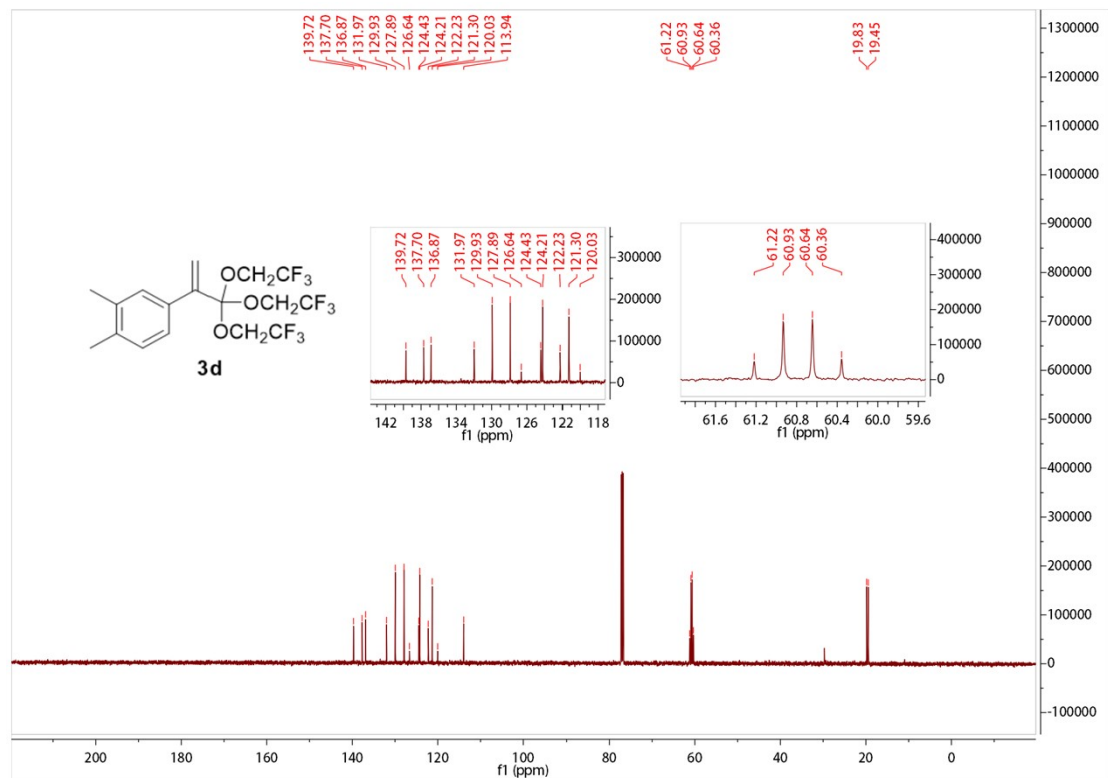

**<sup>19</sup>F NMR (471 MHz, CDCl<sub>3</sub>) spectrum for 3d**



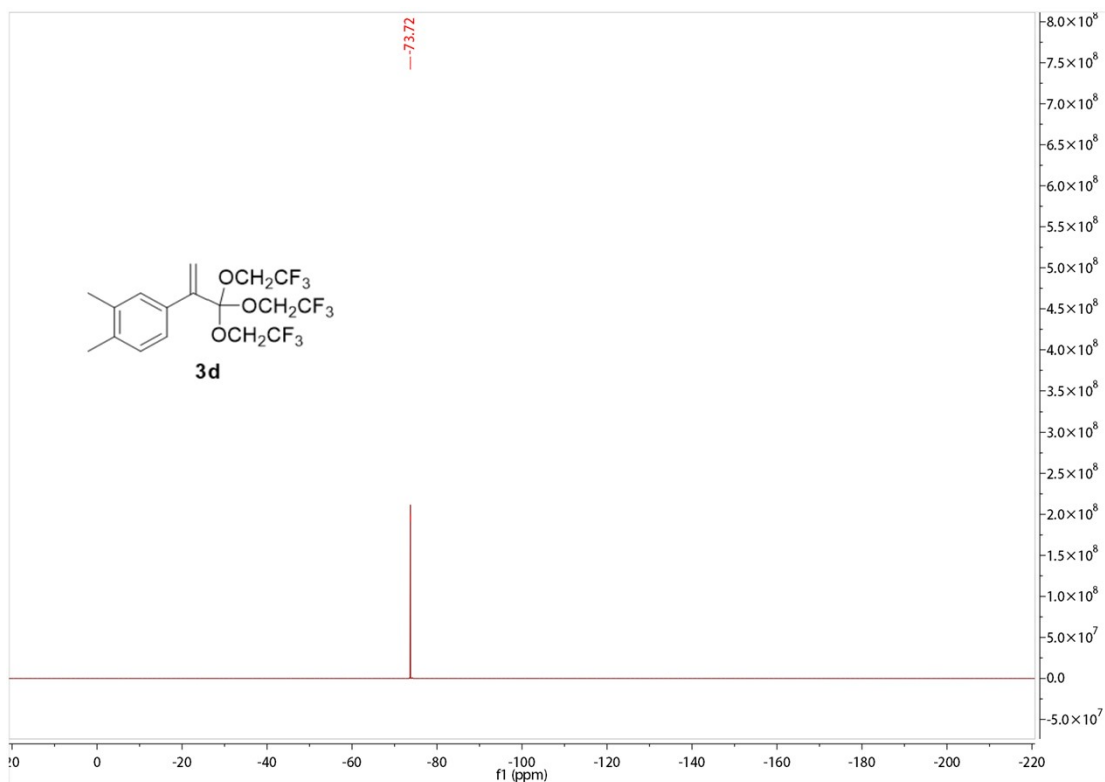

**<sup>1</sup>H NMR (400 MHz, CDCl<sub>3</sub>) spectrum for 3e**

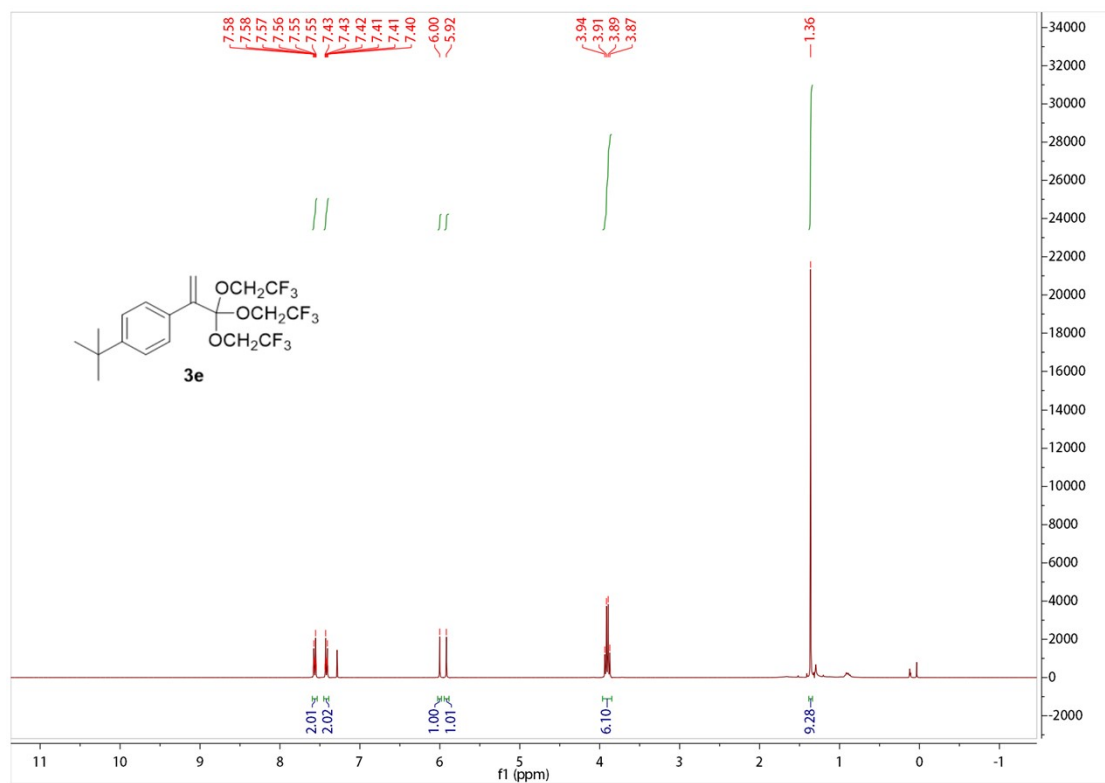

**<sup>13</sup>C NMR (101 MHz, CDCl<sub>3</sub>) spectrum for 3e**

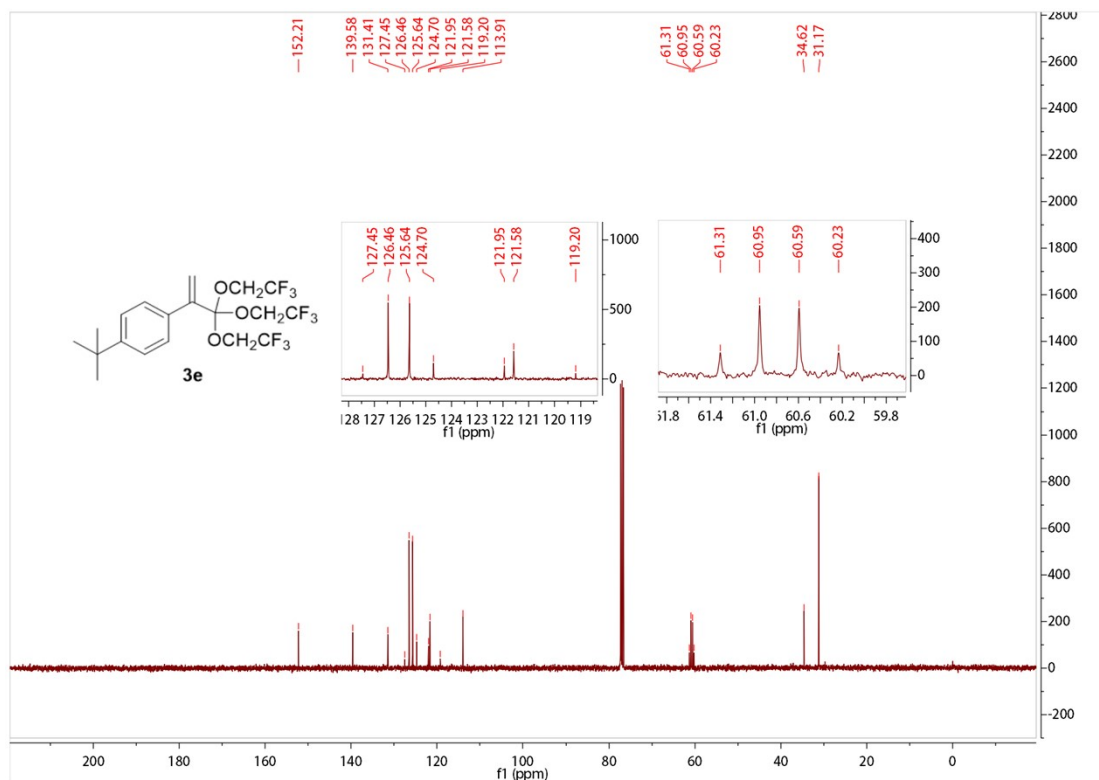

**<sup>19</sup>F NMR (471 MHz, CDCl<sub>3</sub>) spectrum for 3e**

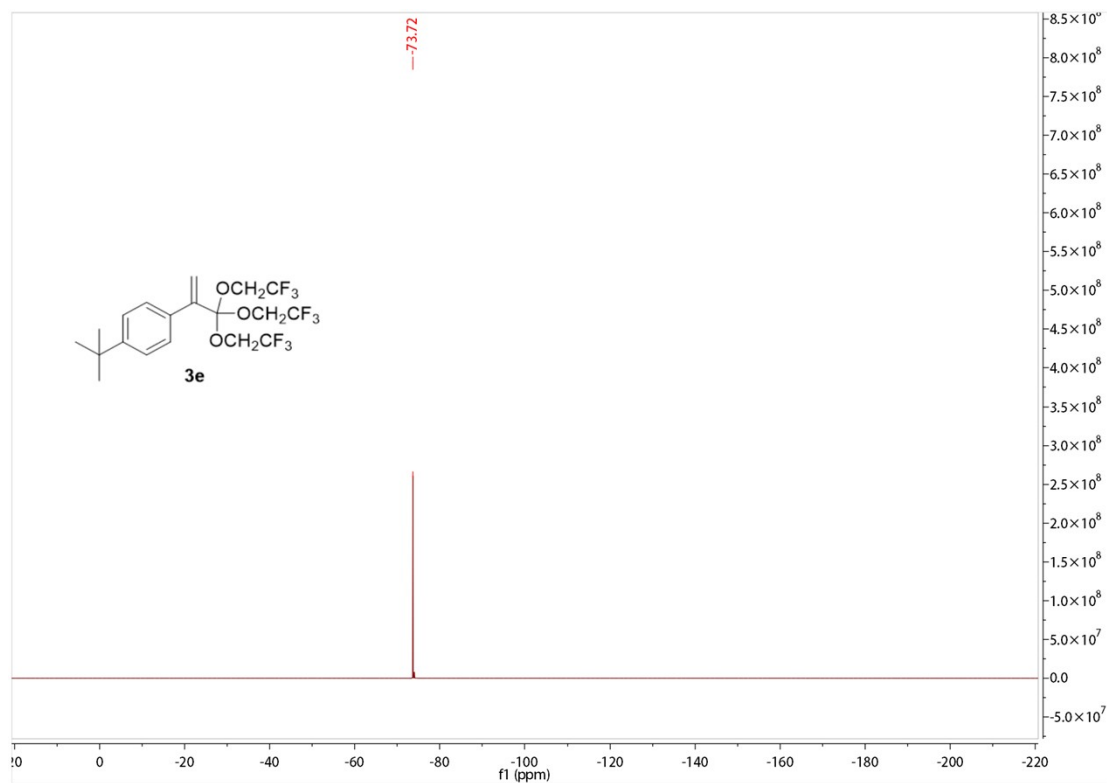

**<sup>1</sup>H NMR (500 MHz, CDCl<sub>3</sub>) spectrum for 3f**

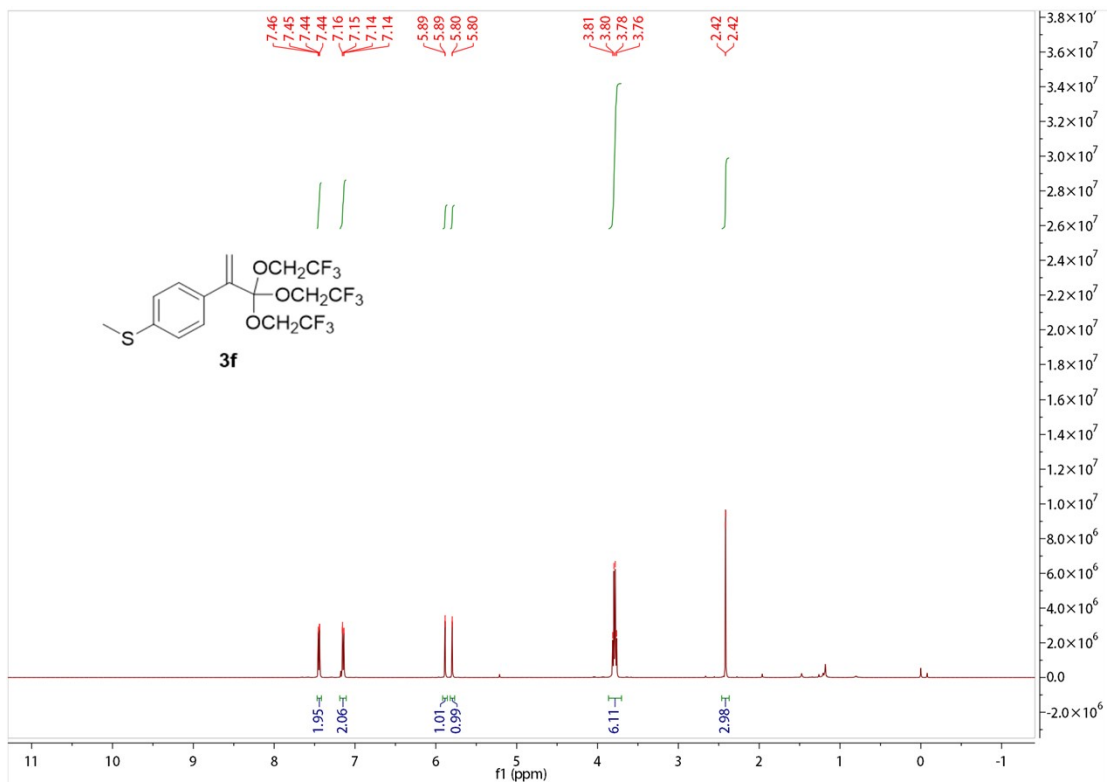

**<sup>13</sup>C NMR (126 MHz, CDCl<sub>3</sub>) spectrum for 3f**

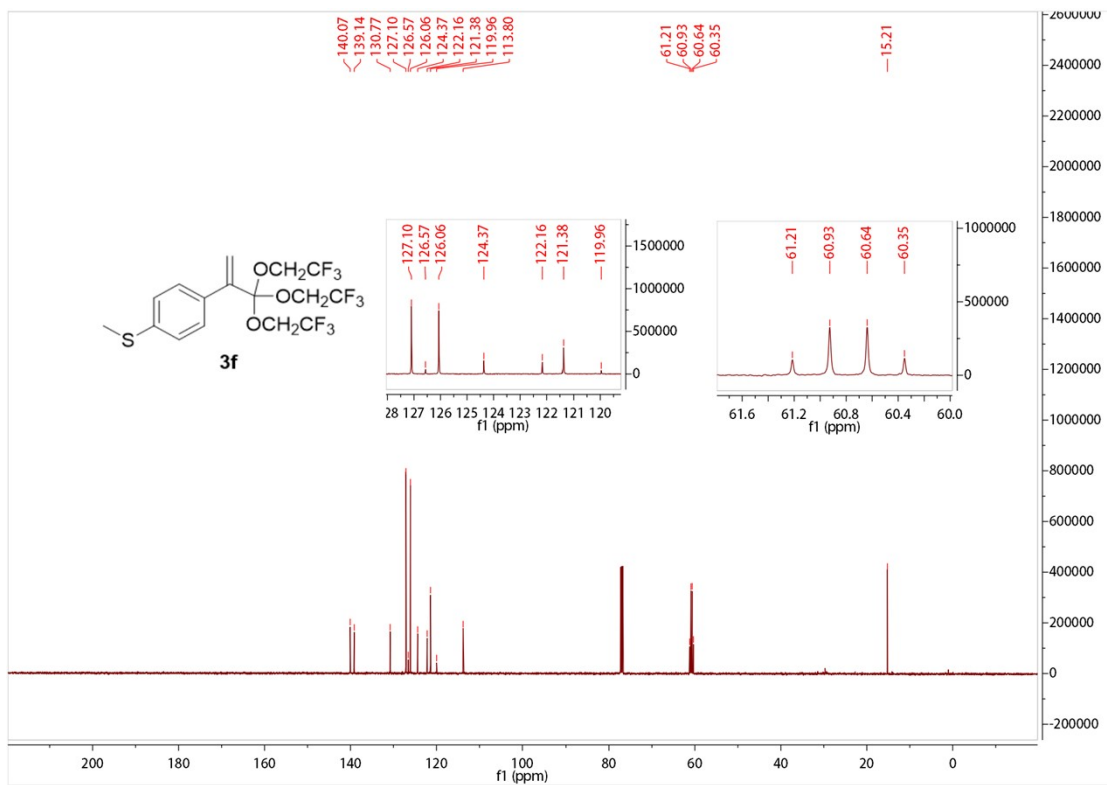

**<sup>19</sup>F NMR (471 MHz, CDCl<sub>3</sub>) spectrum for 3f**

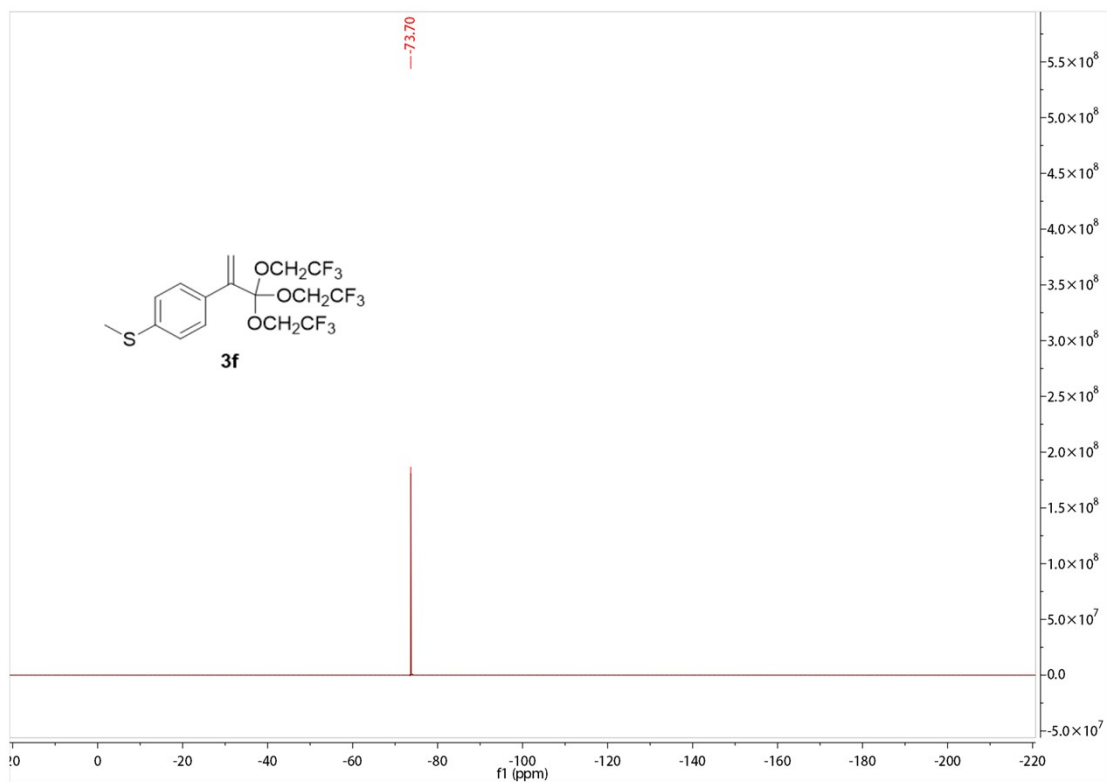

$^1\text{H}$  NMR (500 MHz,  $\text{CDCl}_3$ ) spectrum for **3g**

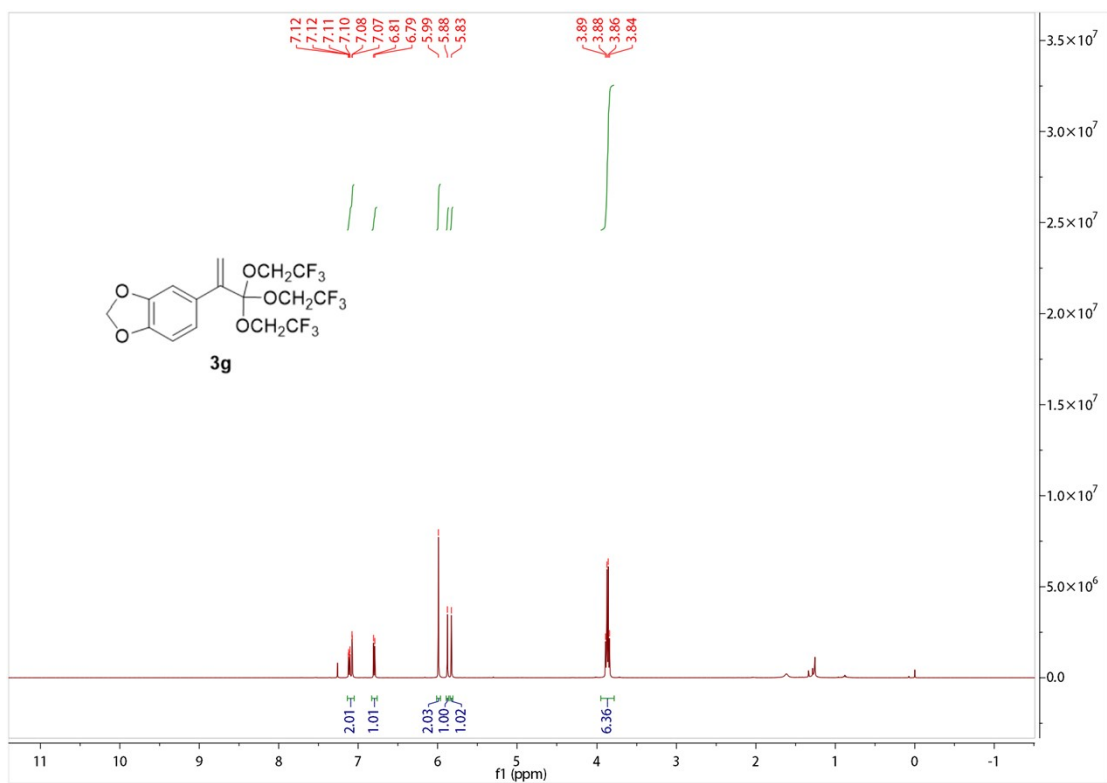

$^{13}\text{C}$  NMR (126 MHz,  $\text{CDCl}_3$ ) spectrum for **3g**

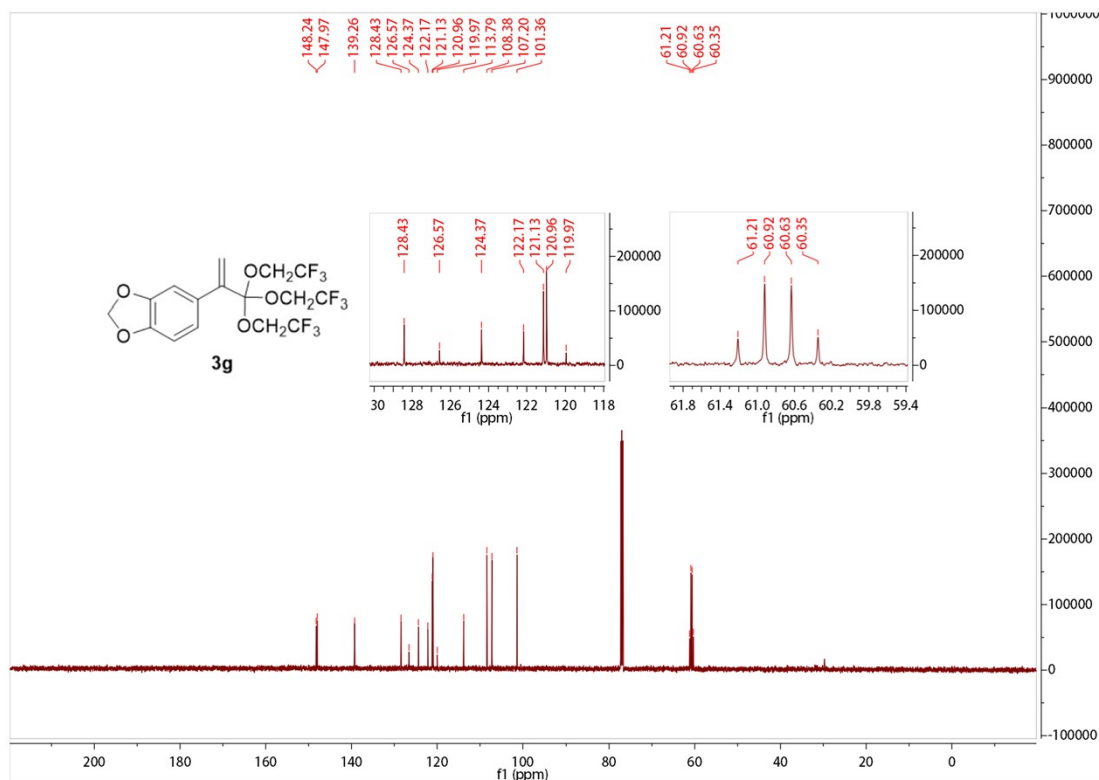

**<sup>19</sup>F NMR (471 MHz, CDCl<sub>3</sub>) spectrum for 3g**

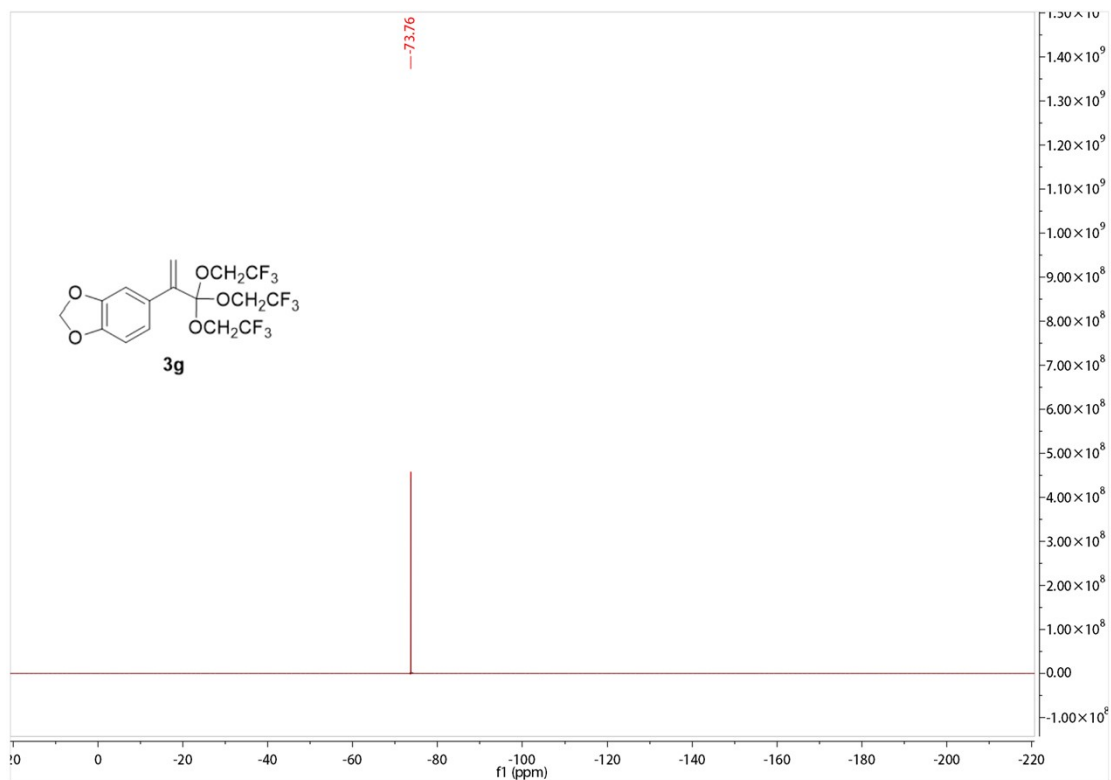

**<sup>1</sup>H NMR (400 MHz, CDCl<sub>3</sub>) spectrum for 3h**

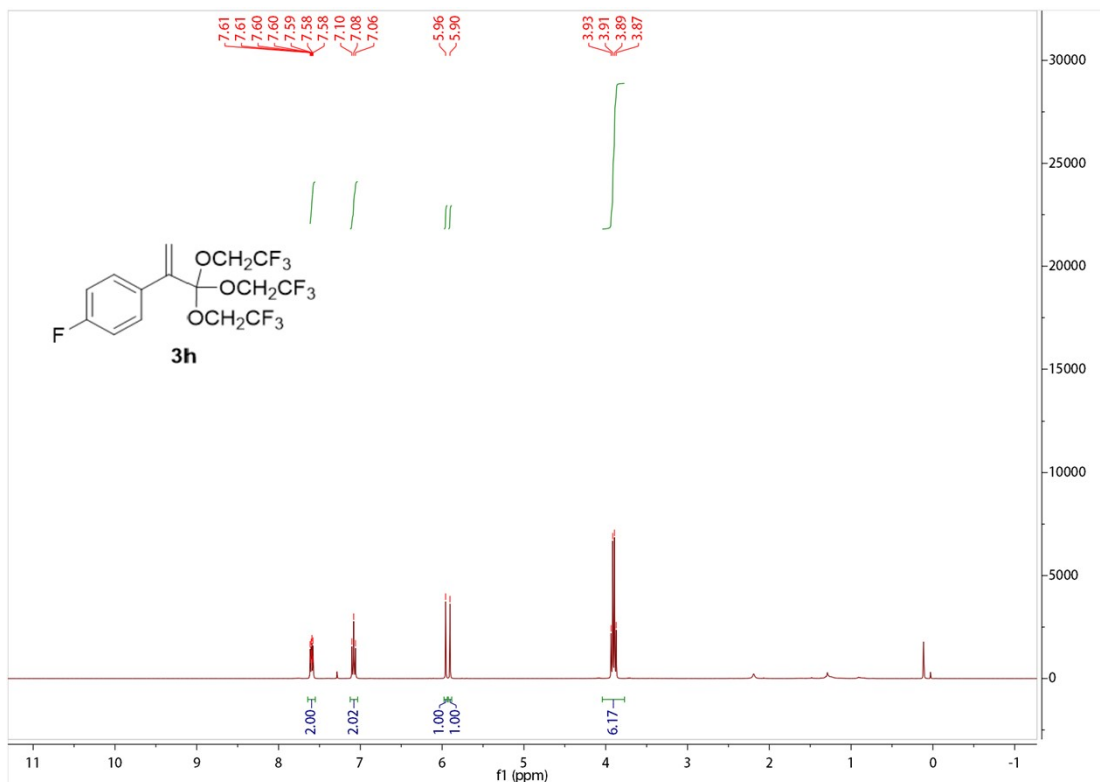

**<sup>13</sup>C NMR (101 MHz, CDCl<sub>3</sub>) spectrum for 3h**

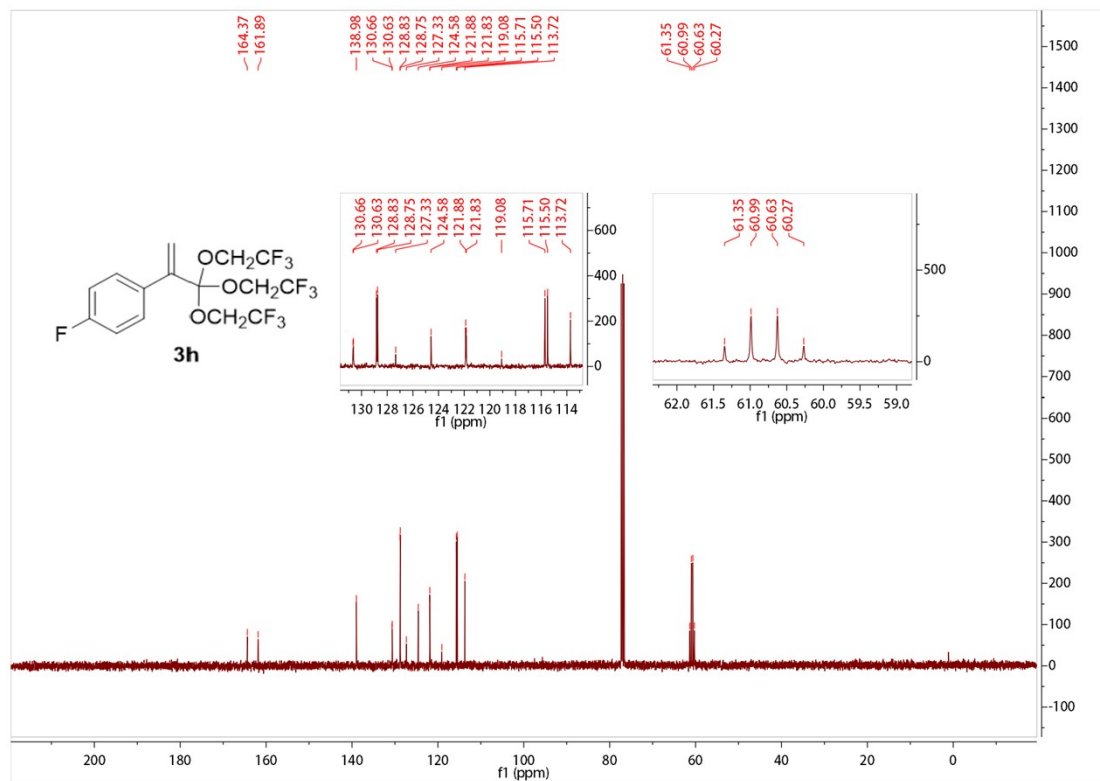

**<sup>19</sup>F NMR (471 MHz, CDCl<sub>3</sub>) spectrum for 3h**

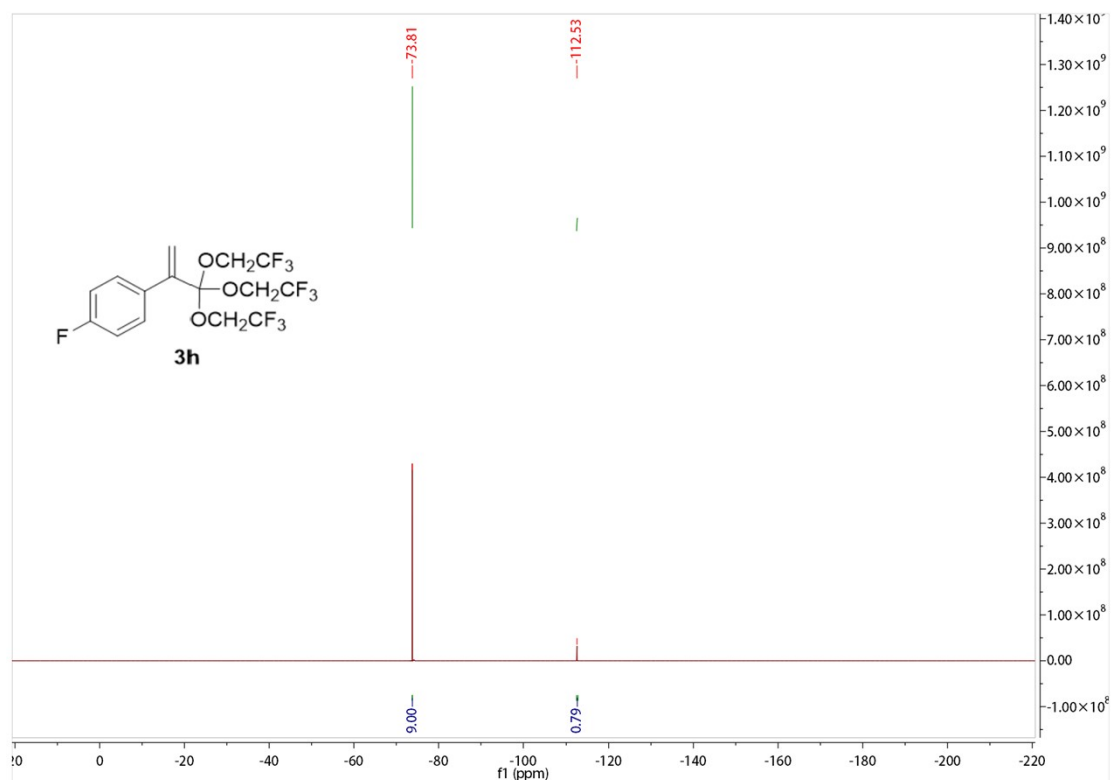

**$^1\text{H}$  NMR (500 MHz,  $\text{CDCl}_3$ ) spectrum for **3i****

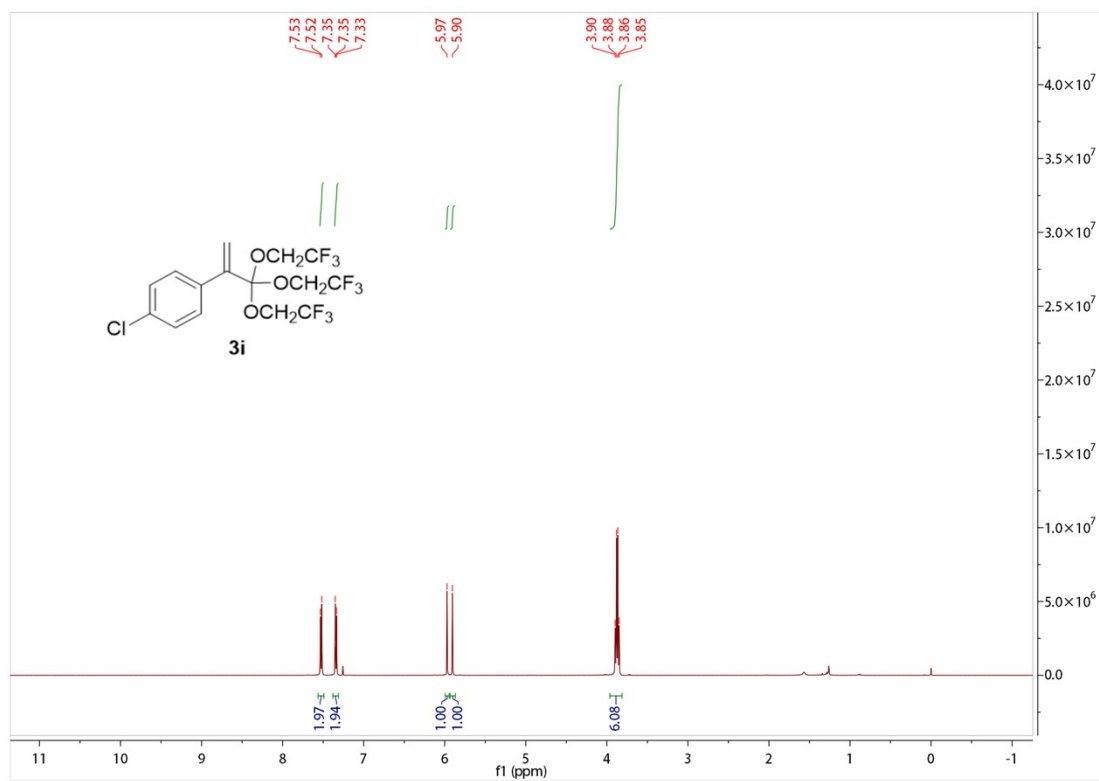

**$^{13}\text{C}$  NMR (126 MHz,  $\text{CDCl}_3$ ) spectrum for **3i****

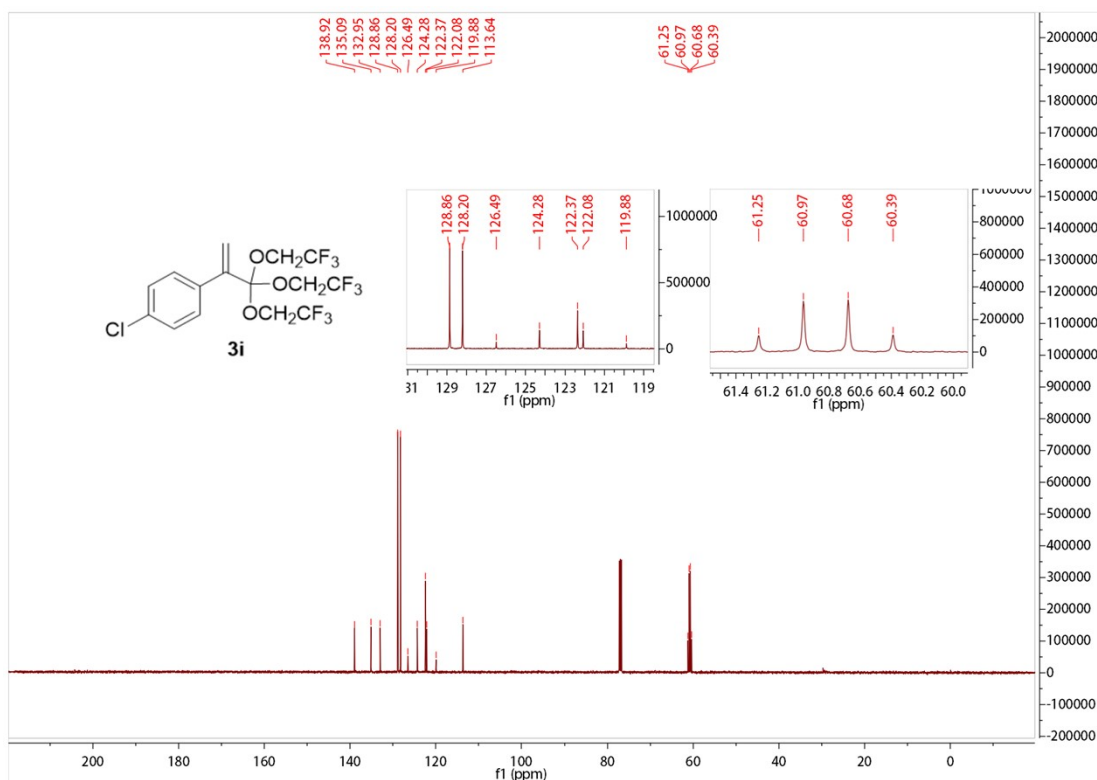

**<sup>19</sup>F NMR (471 MHz, CDCl<sub>3</sub>) spectrum for 3i**

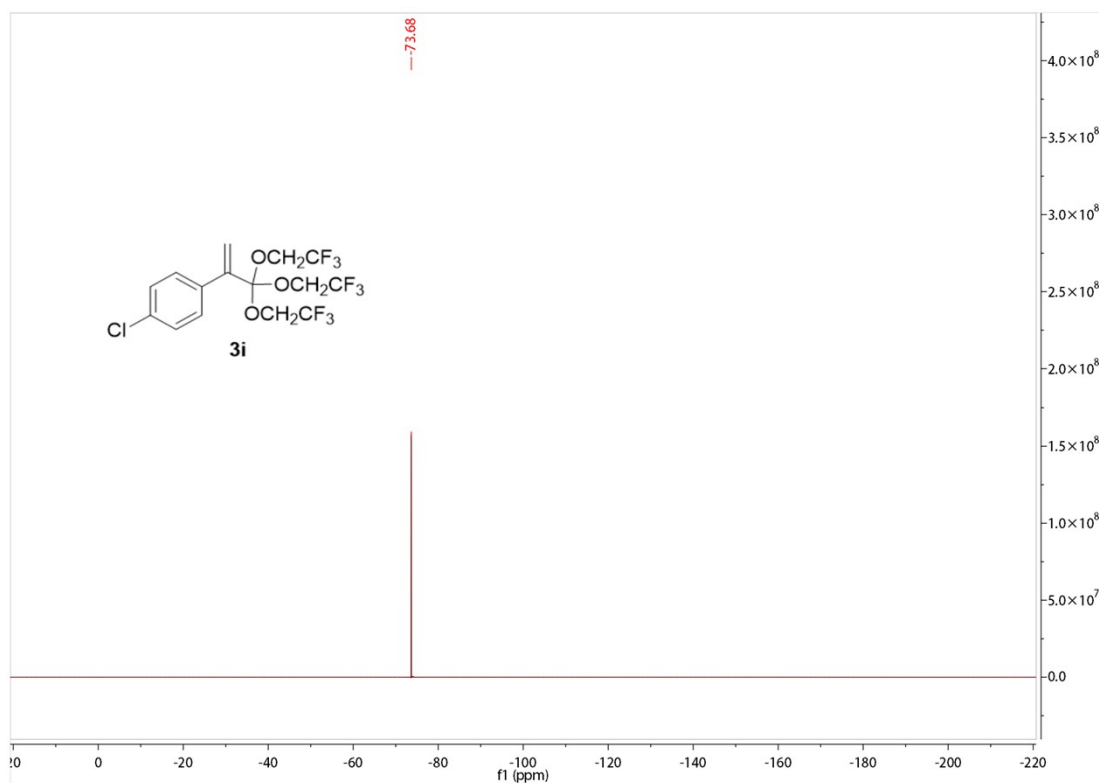

**<sup>1</sup>H NMR (400 MHz, CDCl<sub>3</sub>) spectrum for 3j**



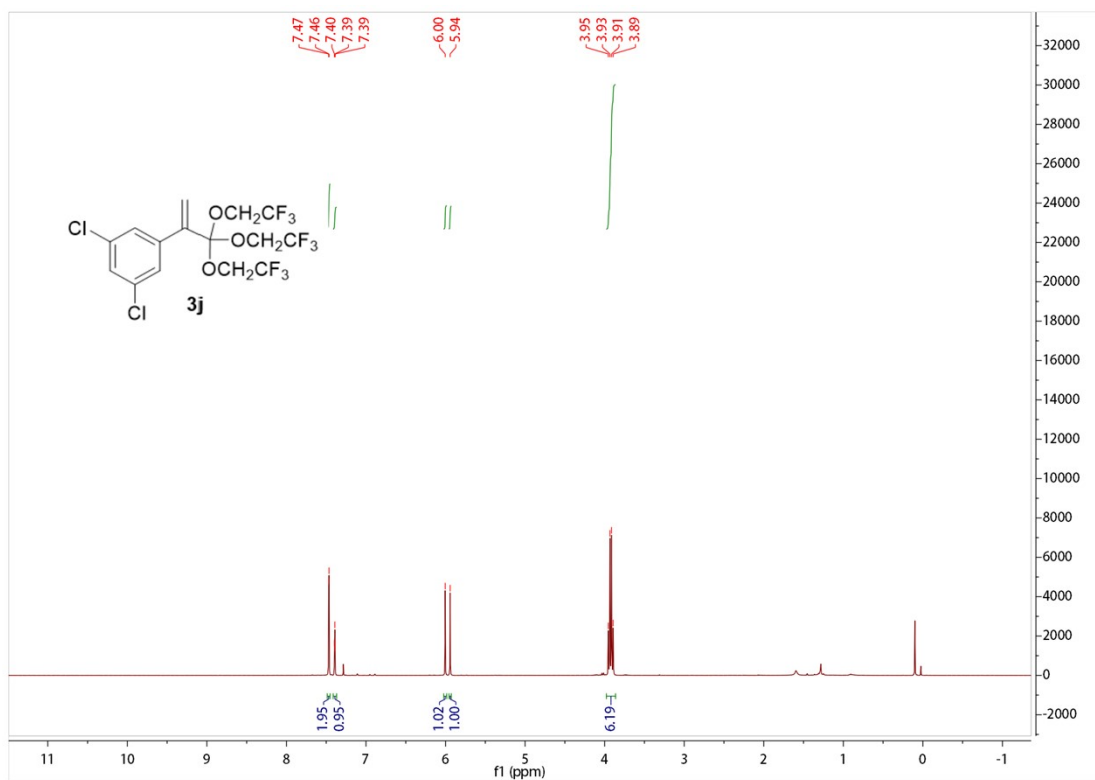

**<sup>13</sup>C NMR (101 MHz, CDCl<sub>3</sub>) spectrum for 3j**

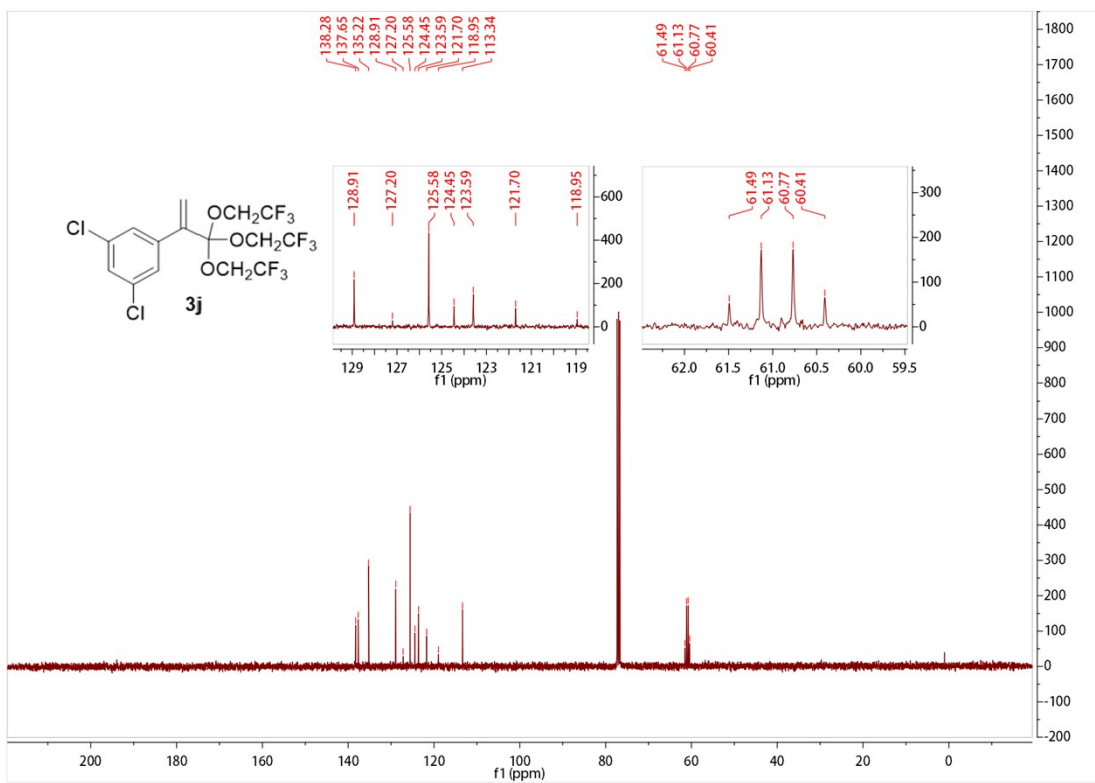

**<sup>19</sup>F NMR (376 MHz, CDCl<sub>3</sub>) spectrum for 3j**

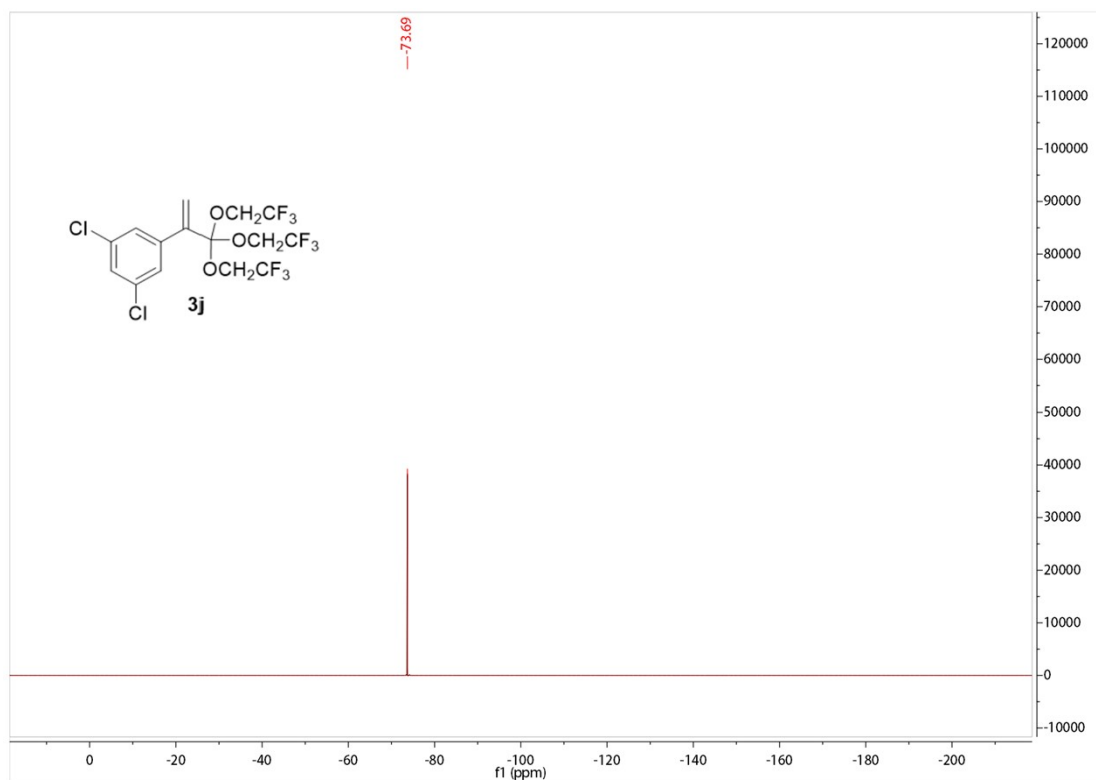

**<sup>1</sup>H NMR (400 MHz, CDCl<sub>3</sub>) spectrum for 3k**

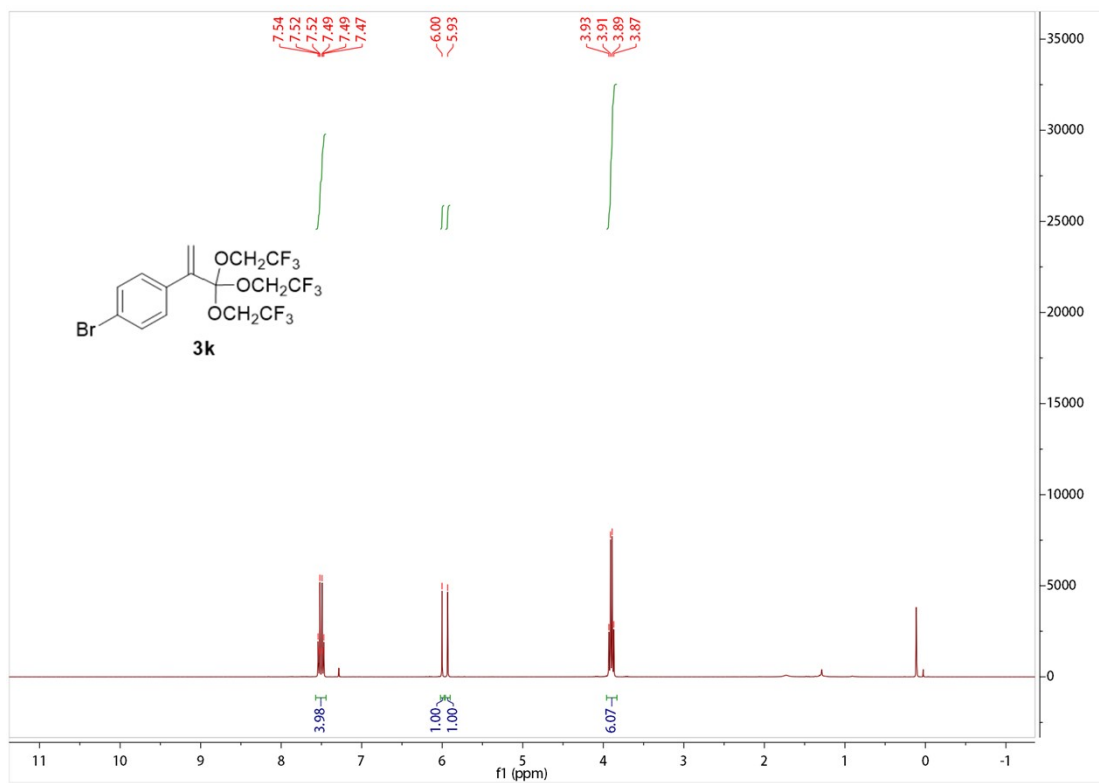

**<sup>13</sup>C NMR (101 MHz, CDCl<sub>3</sub>) spectrum for 3k**

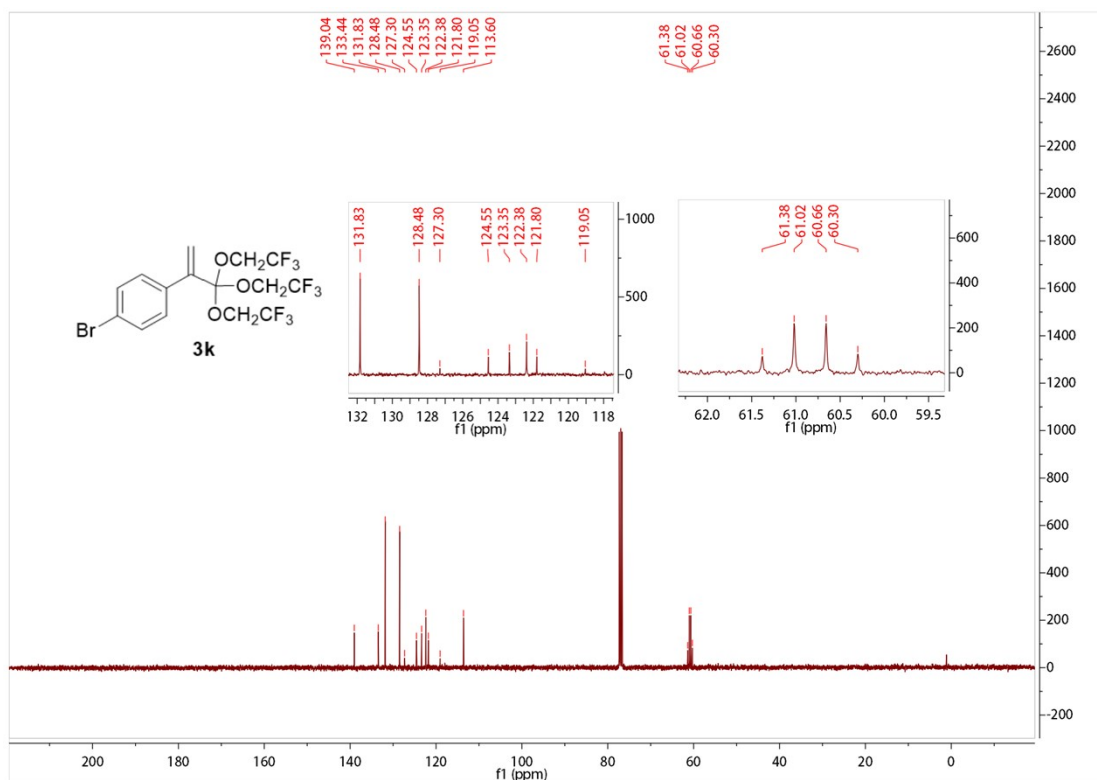

**<sup>19</sup>F NMR (471 MHz, CDCl<sub>3</sub>) spectrum for 3k**

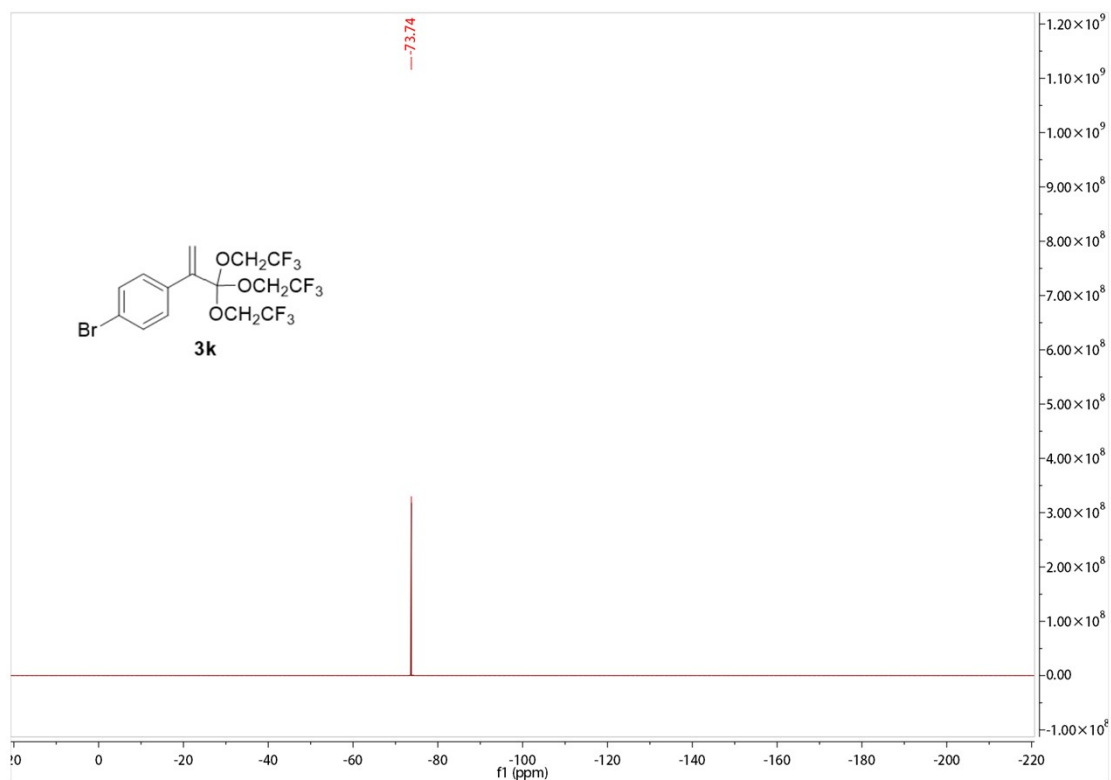

**<sup>1</sup>H NMR (500 MHz, CDCl<sub>3</sub>) spectrum for 3l**

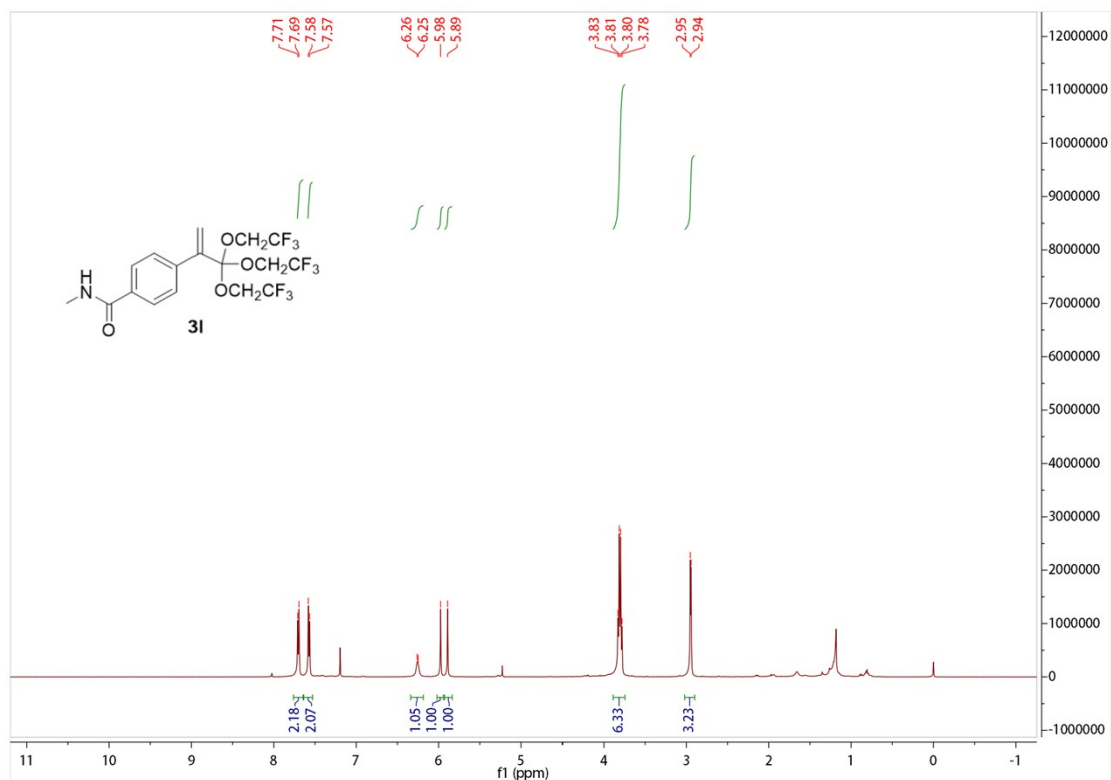

**<sup>13</sup>C NMR (126 MHz, CDCl<sub>3</sub>) spectrum for 31**

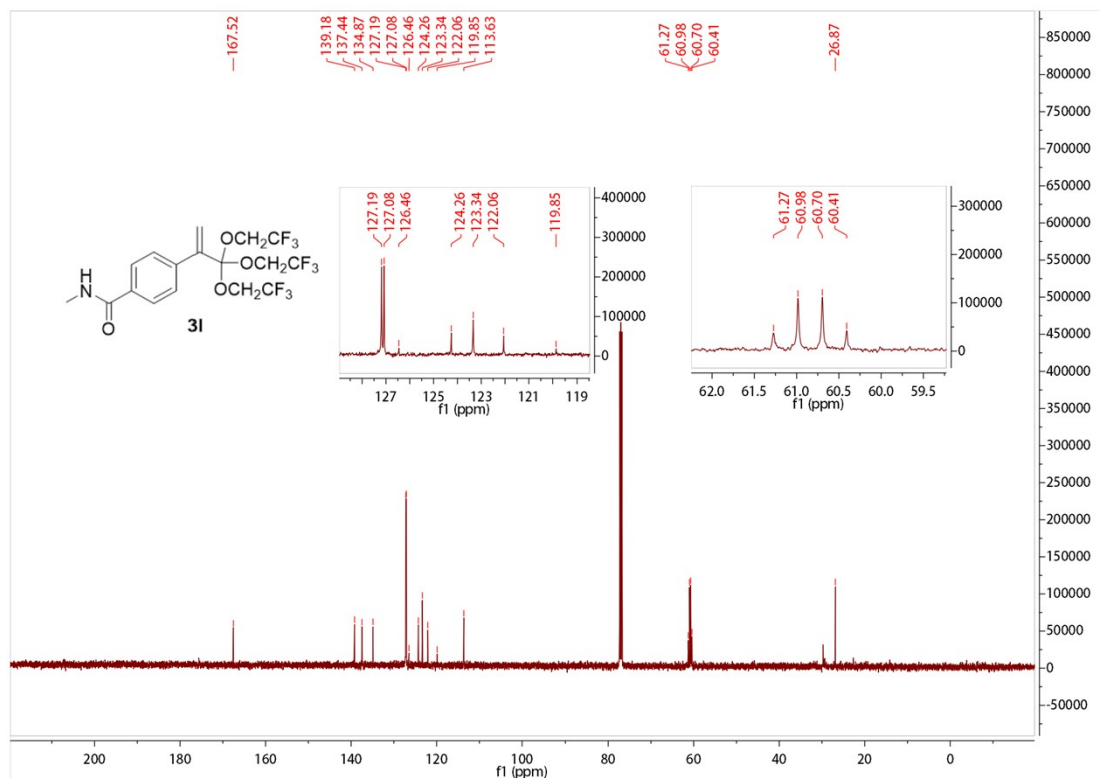

**<sup>19</sup>F NMR (471 MHz, CDCl<sub>3</sub>) spectrum for 31**

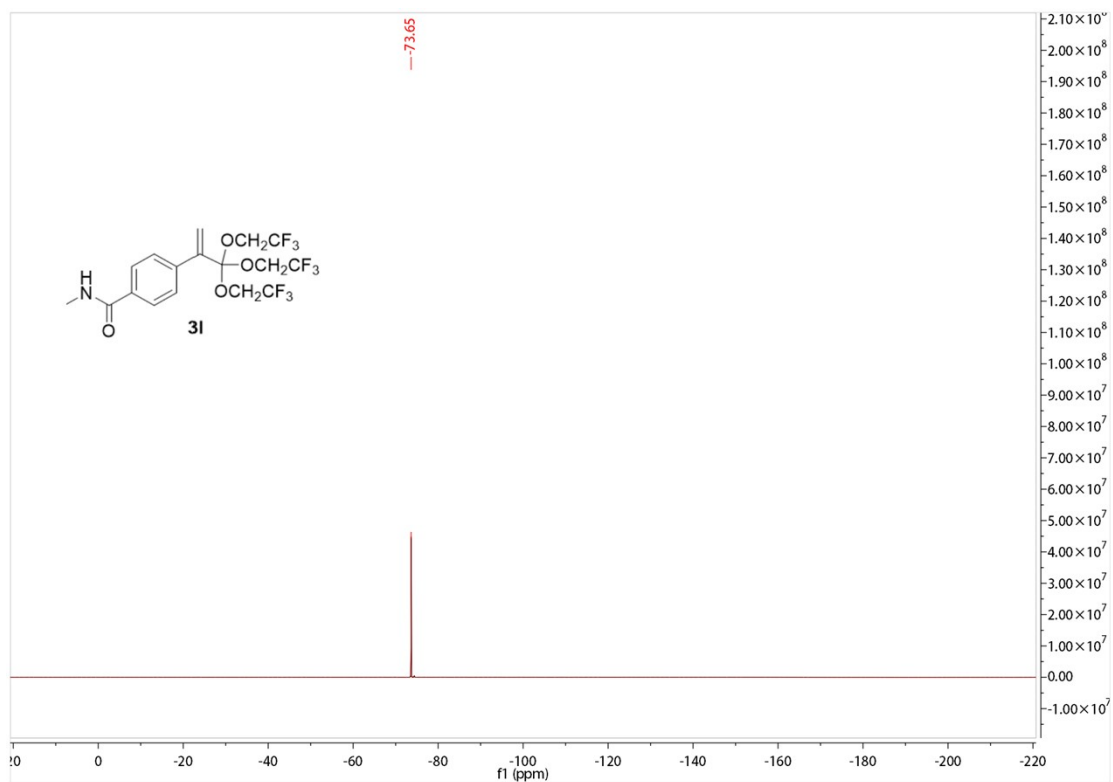

**<sup>1</sup>H NMR (500 MHz, CDCl<sub>3</sub>) spectrum for 3m**

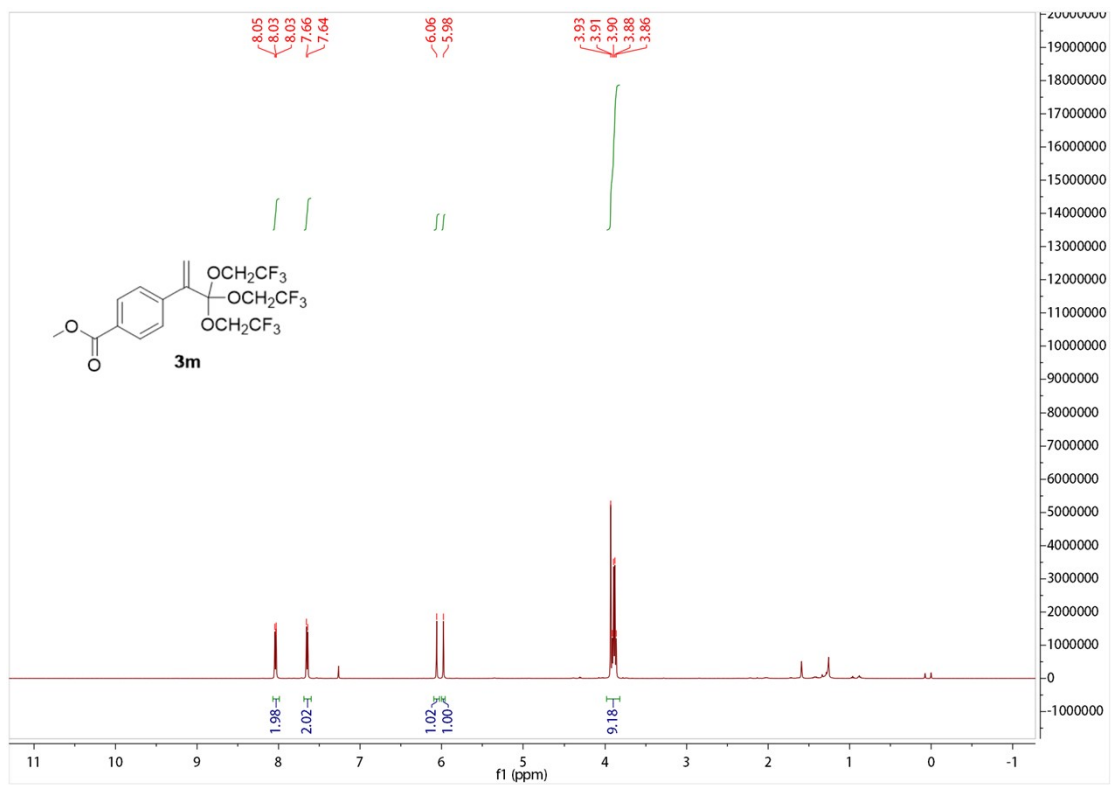

**<sup>13</sup>C NMR (126 MHz, CDCl<sub>3</sub>) spectrum for 3m**

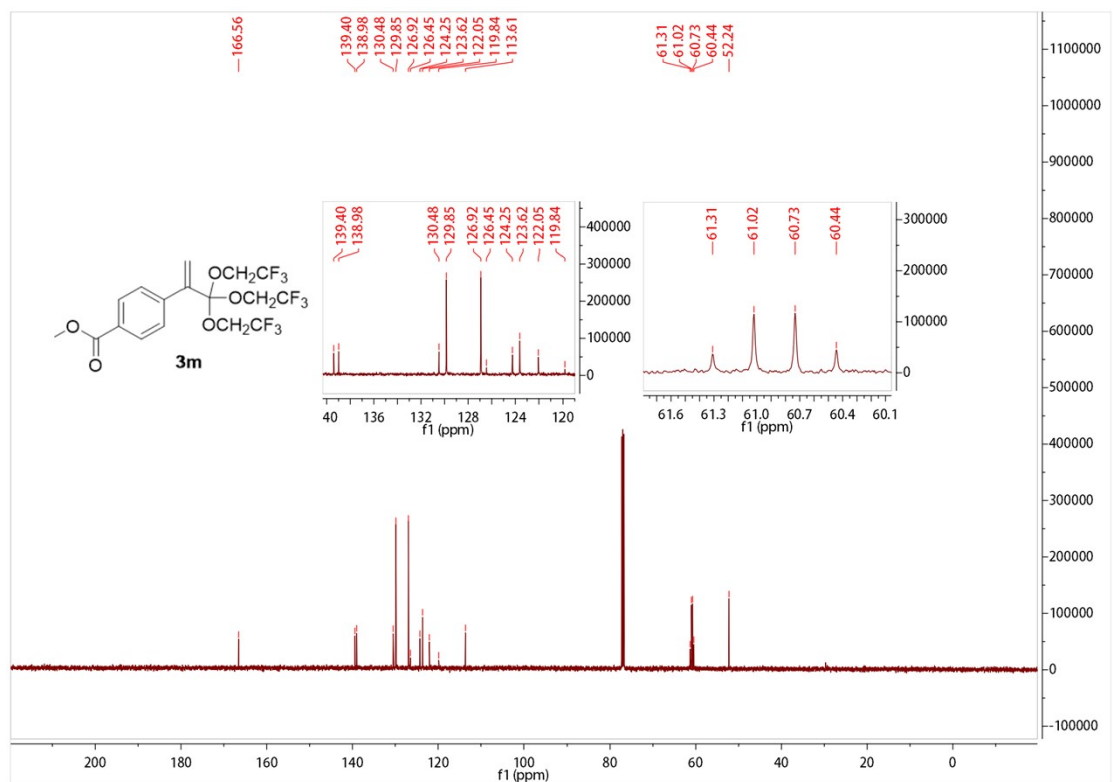

**<sup>19</sup>F NMR (471 MHz, CDCl<sub>3</sub>) spectrum for 3m**

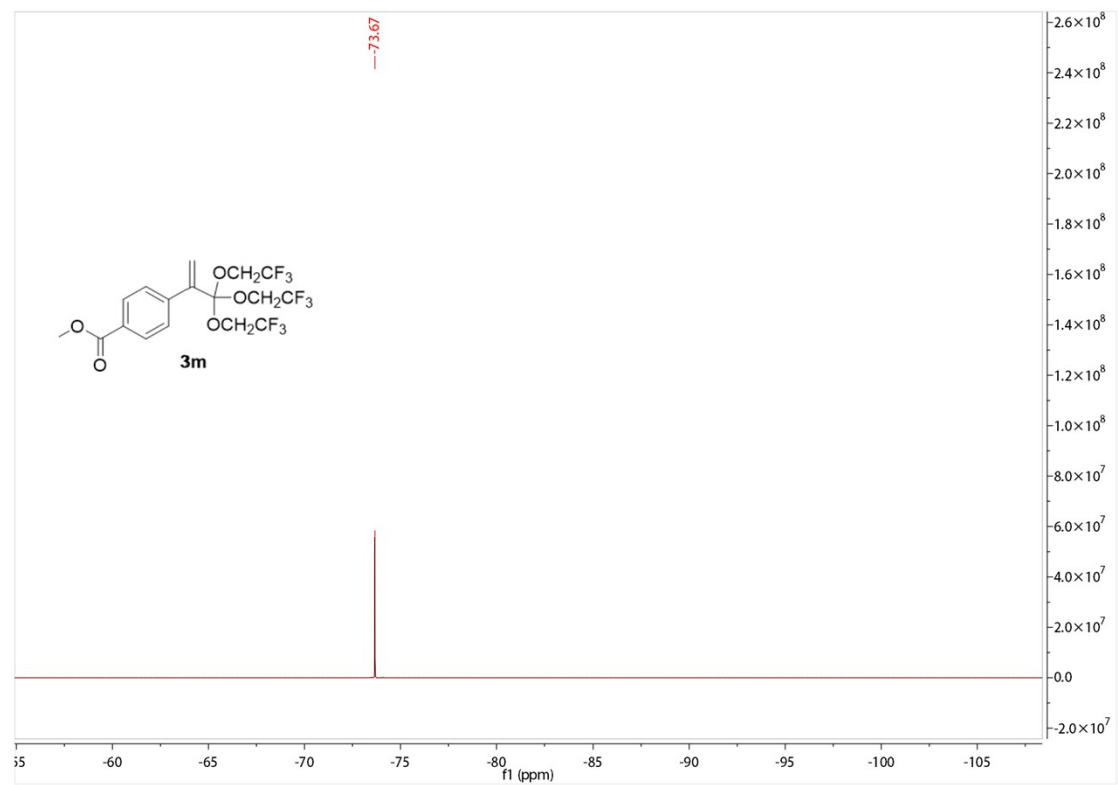

**<sup>1</sup>H NMR (500 MHz, CDCl<sub>3</sub>) spectrum for 3n**

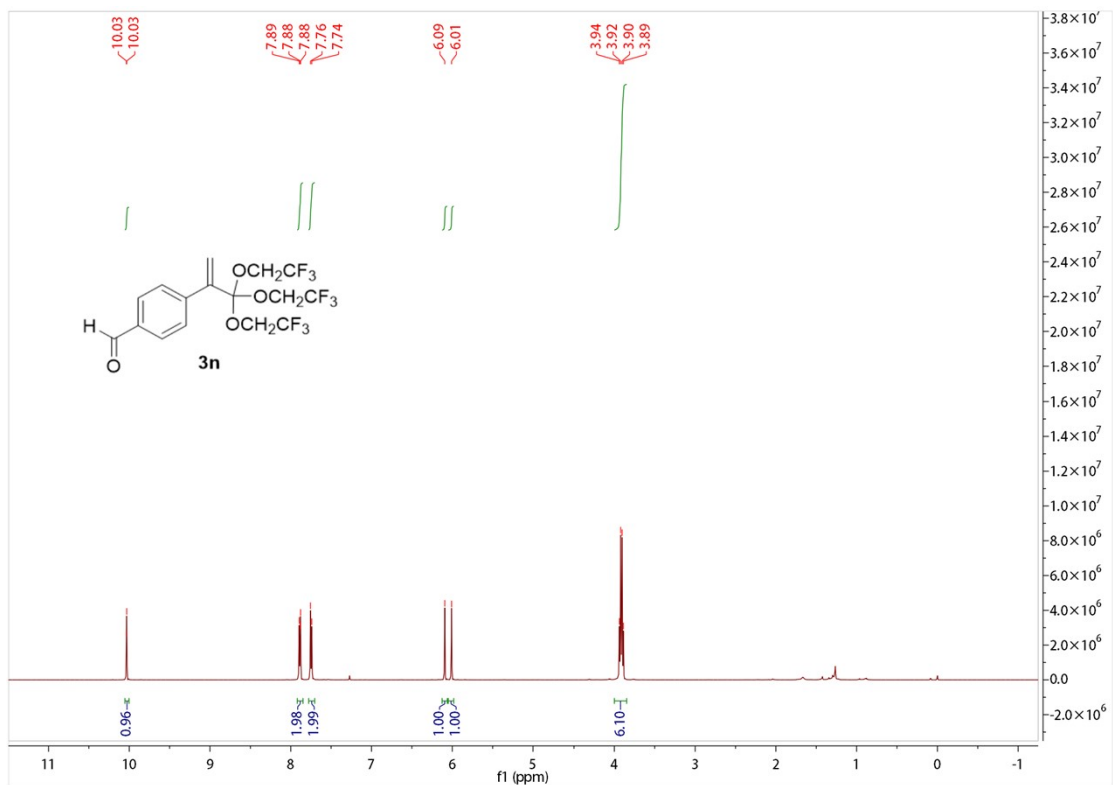

**<sup>13</sup>C NMR (126 MHz, CDCl<sub>3</sub>) spectrum for 3n**

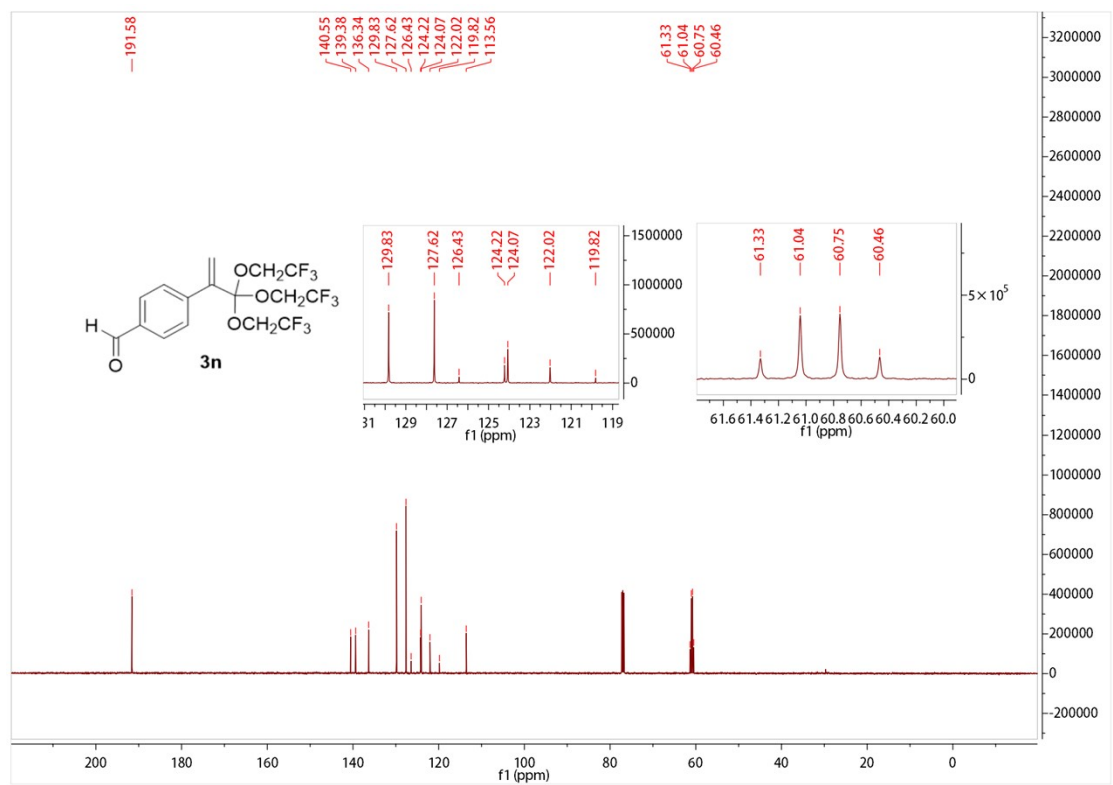

**<sup>19</sup>F NMR (471 MHz, CDCl<sub>3</sub>) spectrum for 3n**

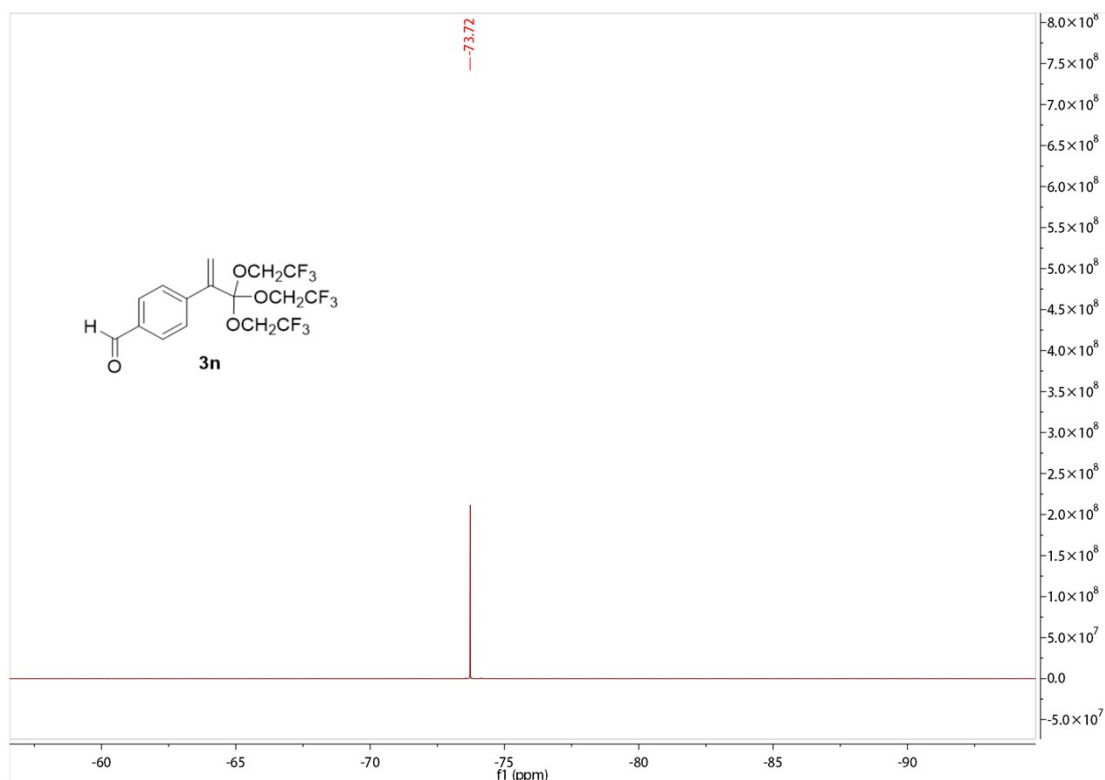

$^1\text{H}$  NMR (500 MHz,  $\text{CDCl}_3$ ) spectrum for **3o**

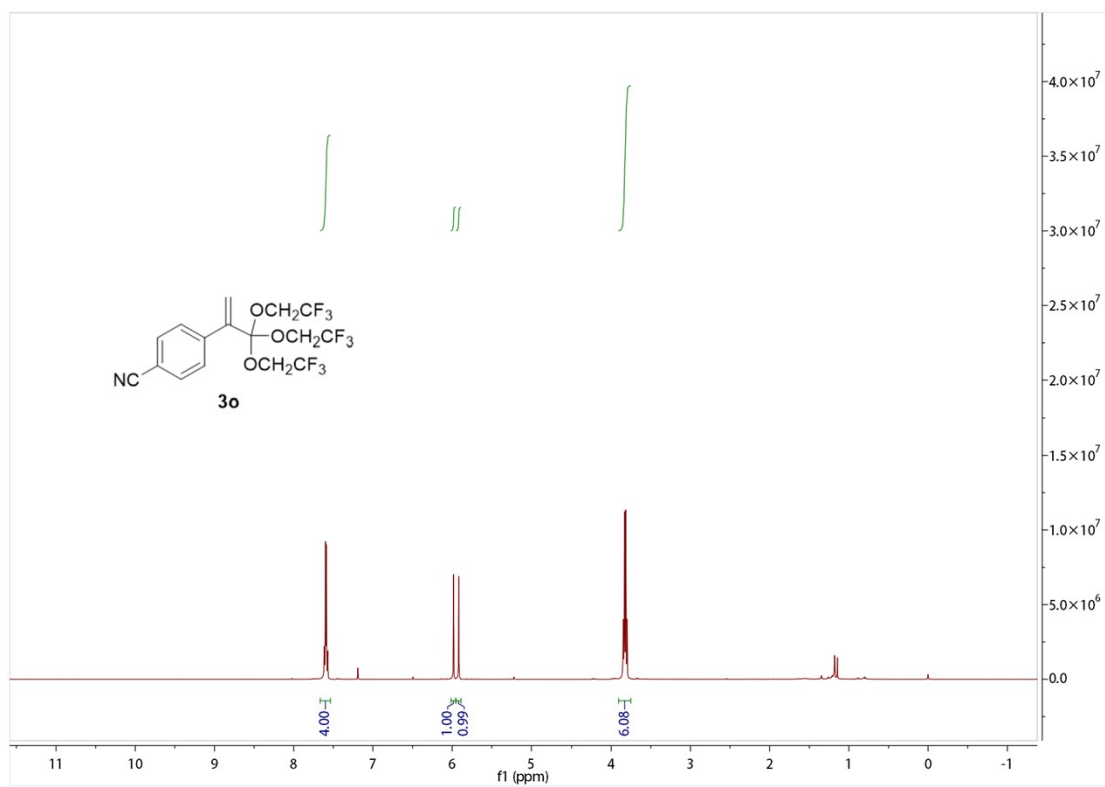

$^{13}\text{C}$  NMR (126 MHz,  $\text{CDCl}_3$ ) spectrum for **3o**



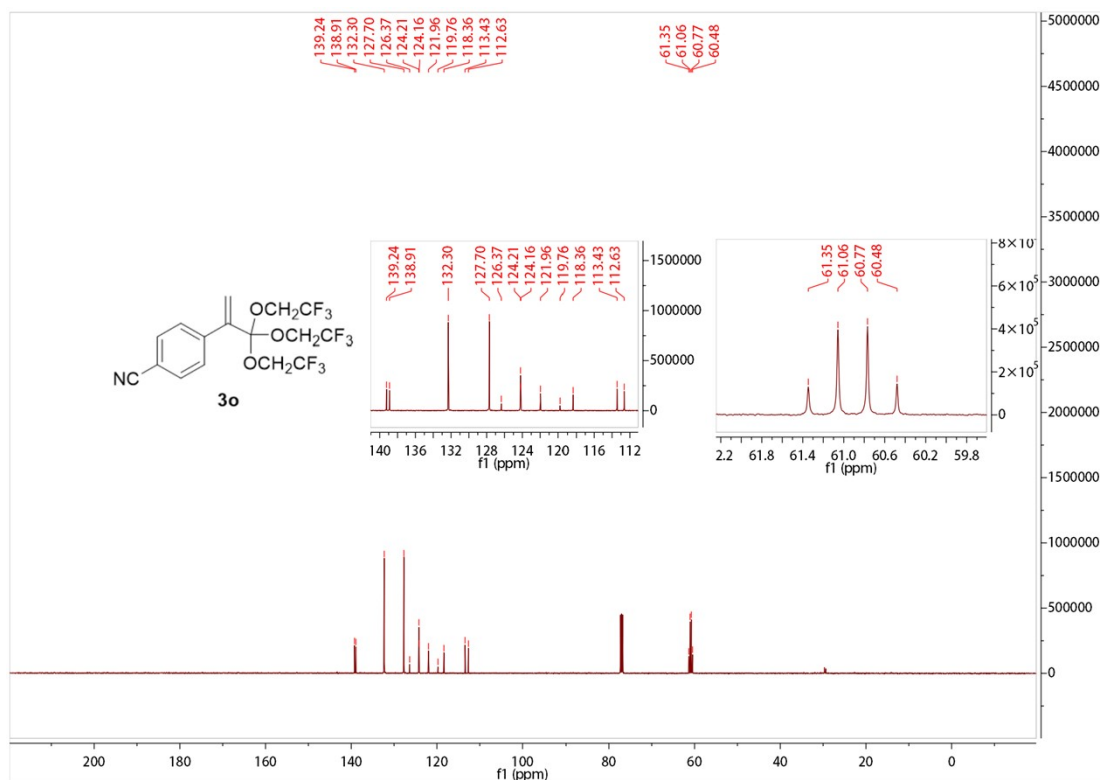

**<sup>19</sup>F NMR (471 MHz, CDCl<sub>3</sub>) spectrum for 3o**

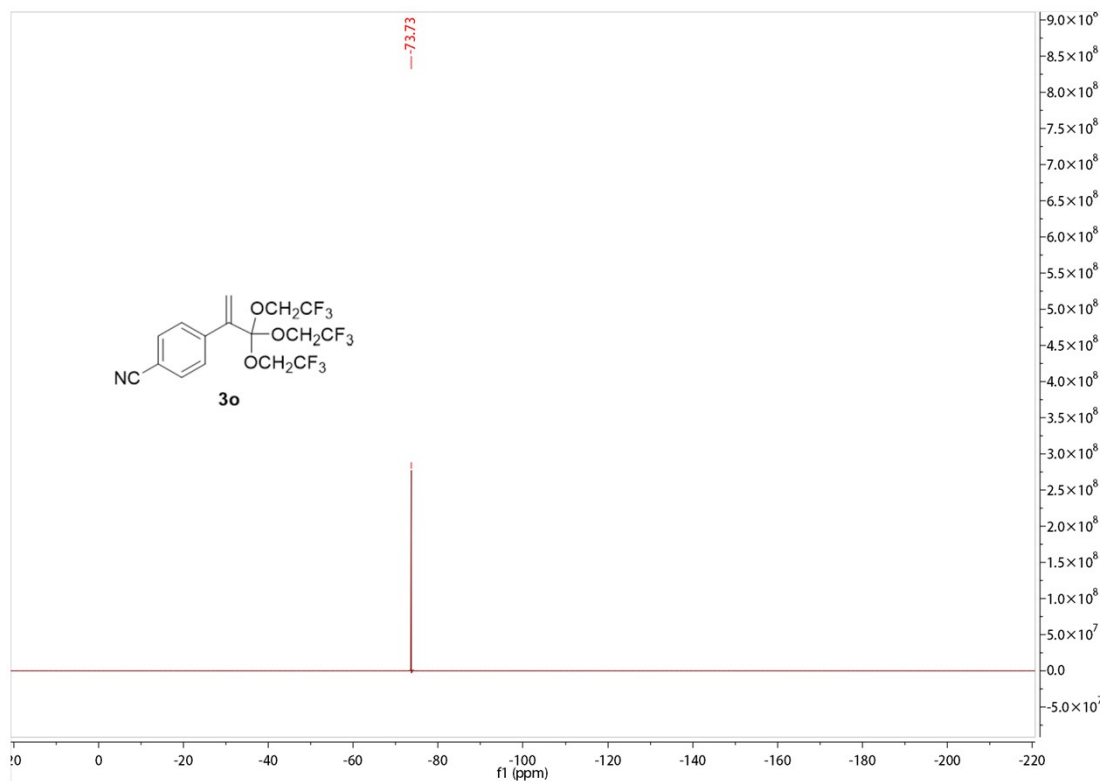

**<sup>1</sup>H NMR (500 MHz, CDCl<sub>3</sub>) spectrum for 3p**

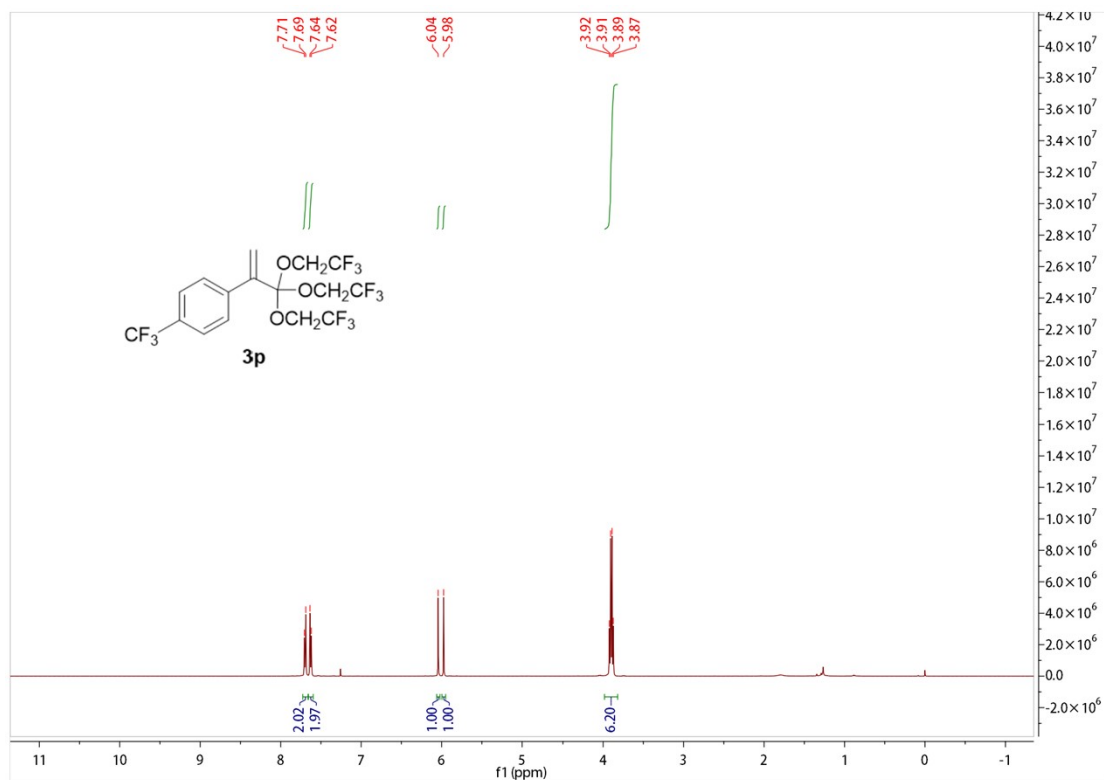

**<sup>13</sup>C NMR (126 MHz, CDCl<sub>3</sub>) spectrum for 3p**

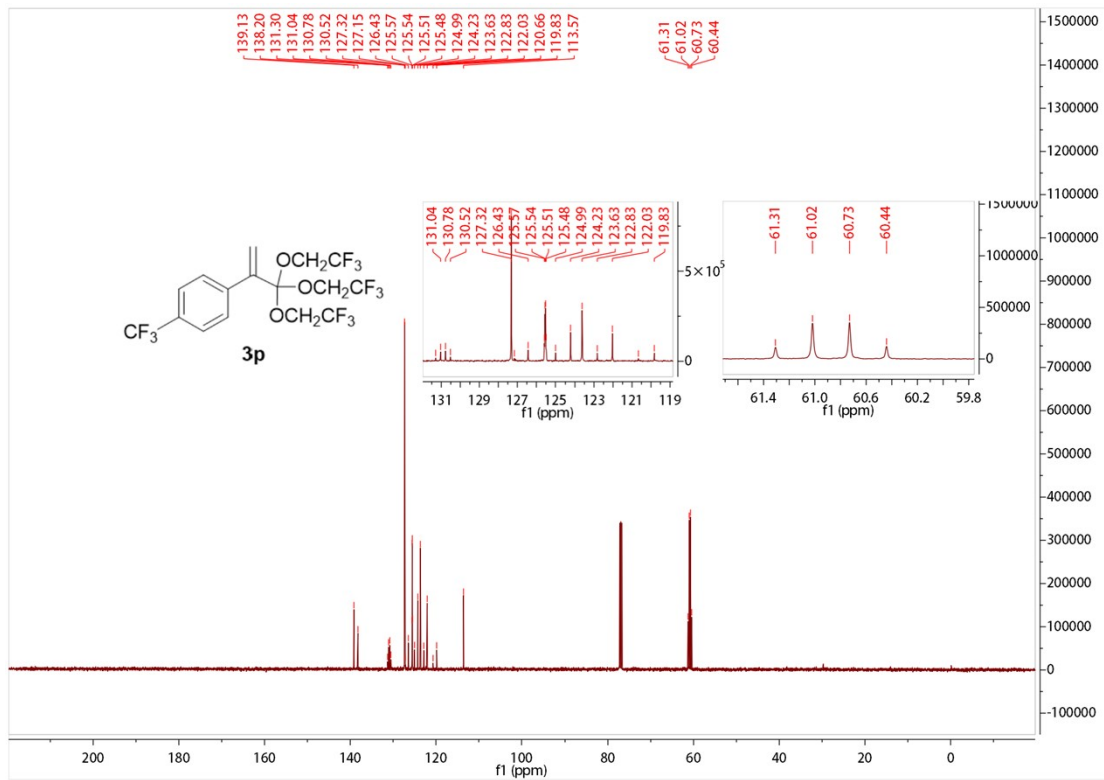

**<sup>19</sup>F NMR (471 MHz, CDCl<sub>3</sub>) spectrum for 3p**

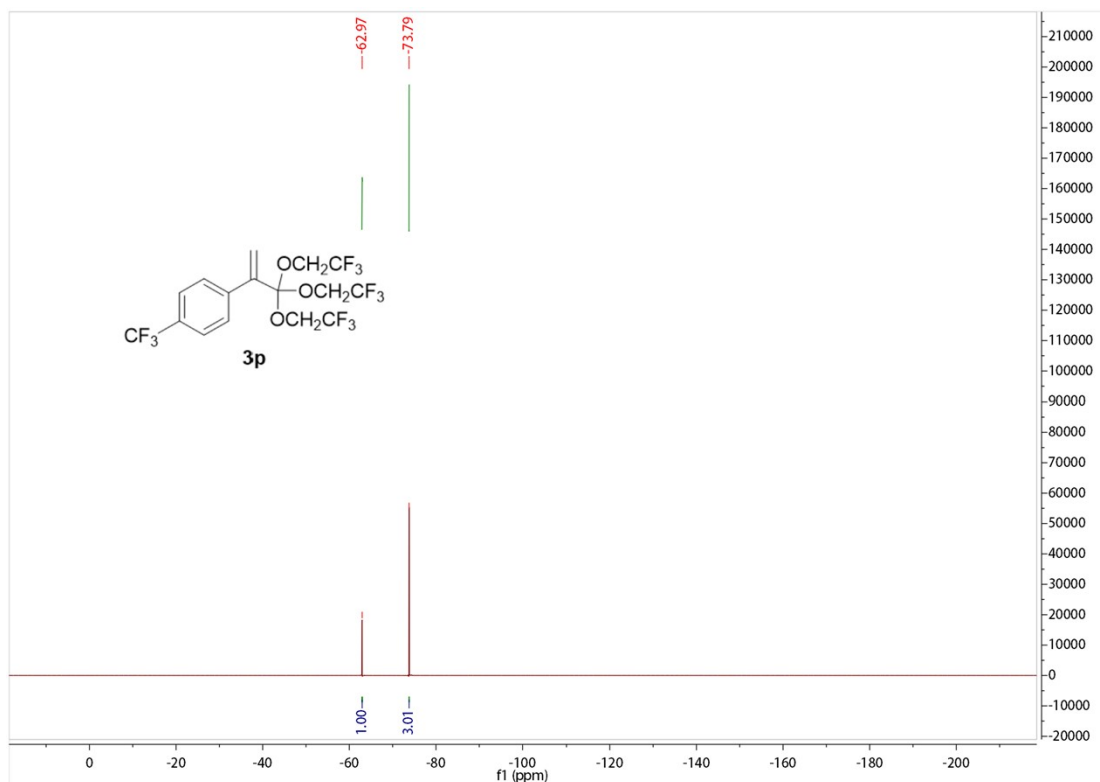

**<sup>1</sup>H NMR (400 MHz, CDCl<sub>3</sub>) spectrum for 3q**

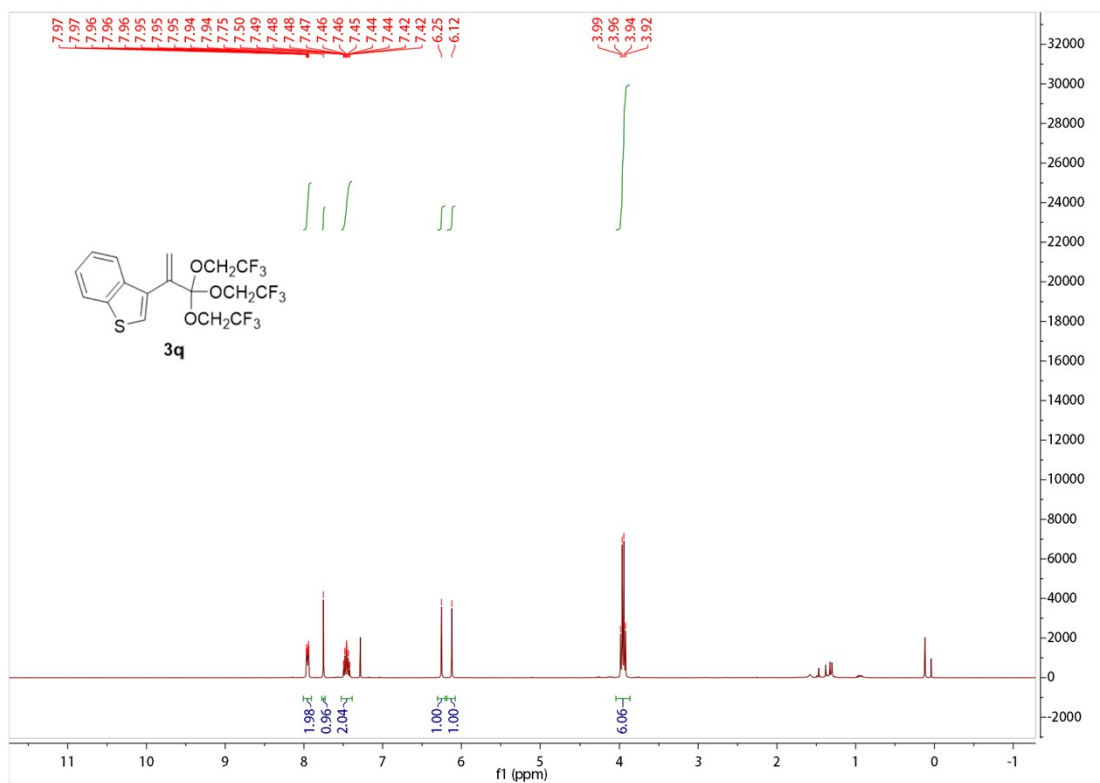

**<sup>13</sup>C NMR (101 MHz, CDCl<sub>3</sub>) spectrum for 3q**

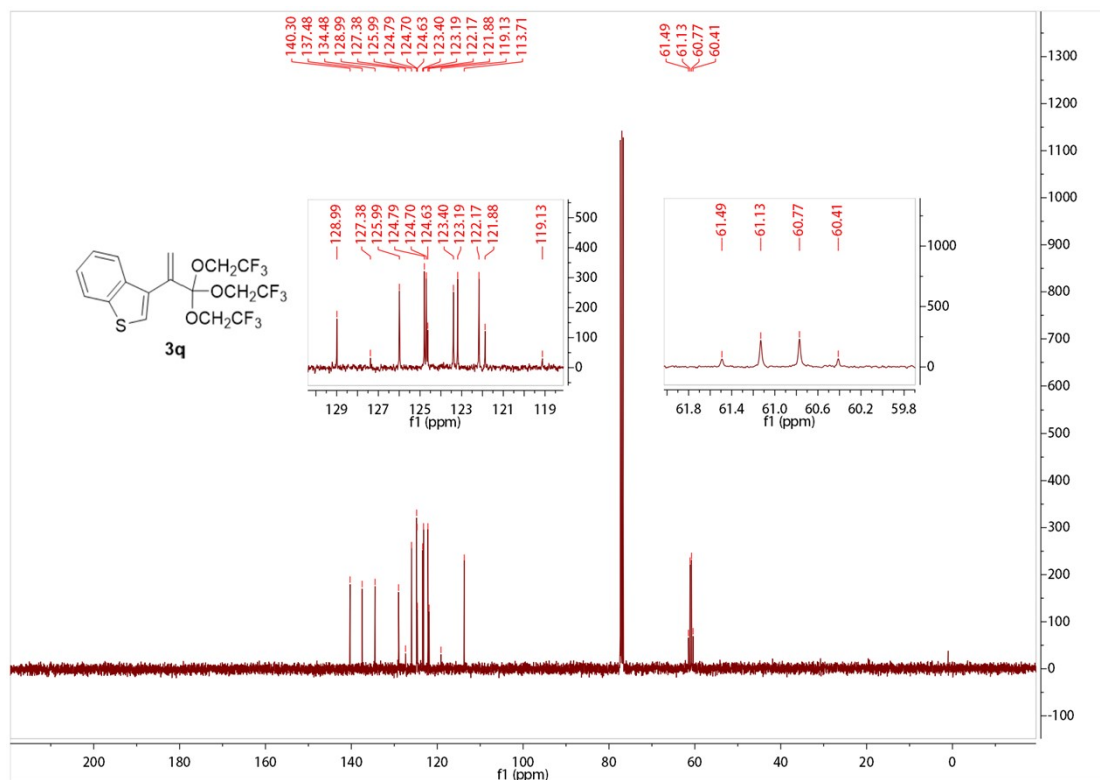

**<sup>19</sup>F NMR (376 MHz, CDCl<sub>3</sub>) spectrum for 3q**

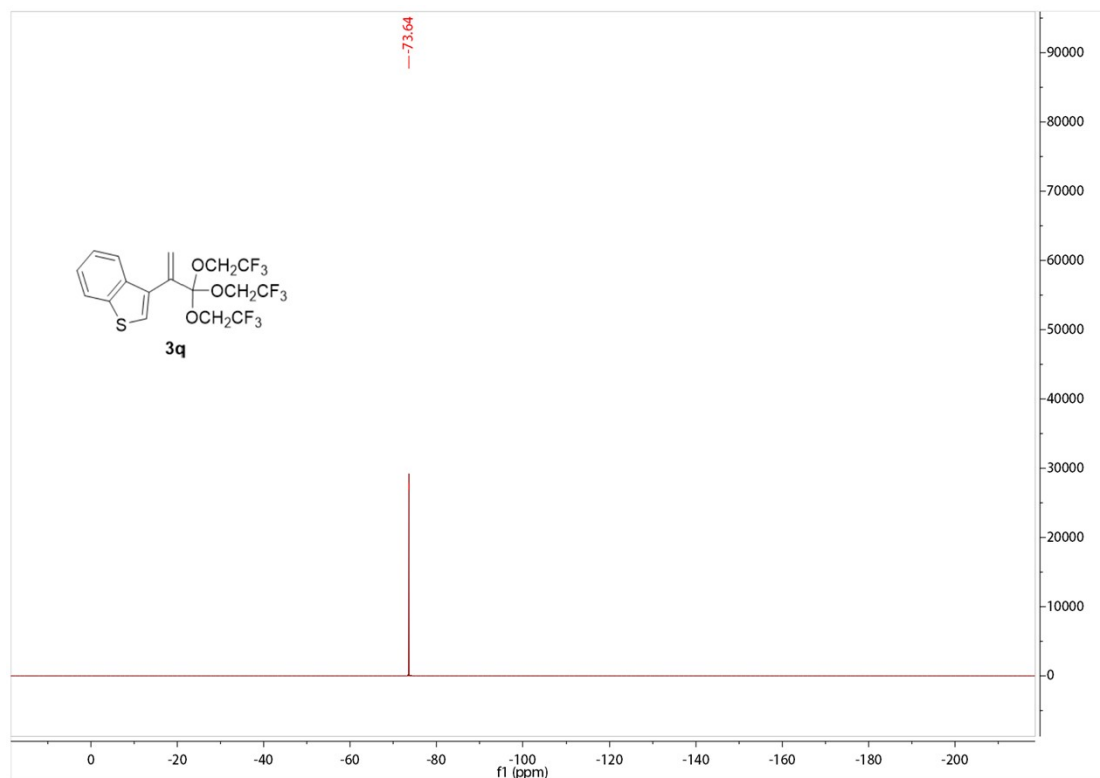

**<sup>1</sup>H NMR (500 MHz, CDCl<sub>3</sub>) spectrum for 3r**

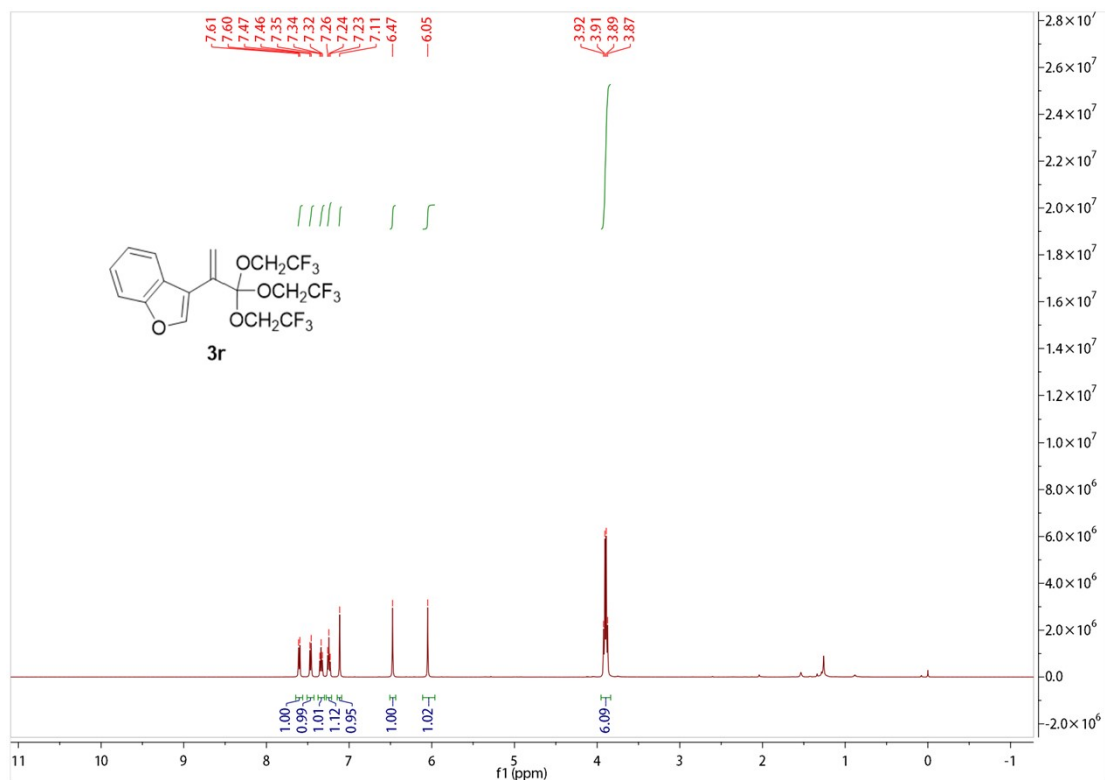

**<sup>13</sup>C NMR (126 MHz, CDCl<sub>3</sub>) spectrum for 3r**

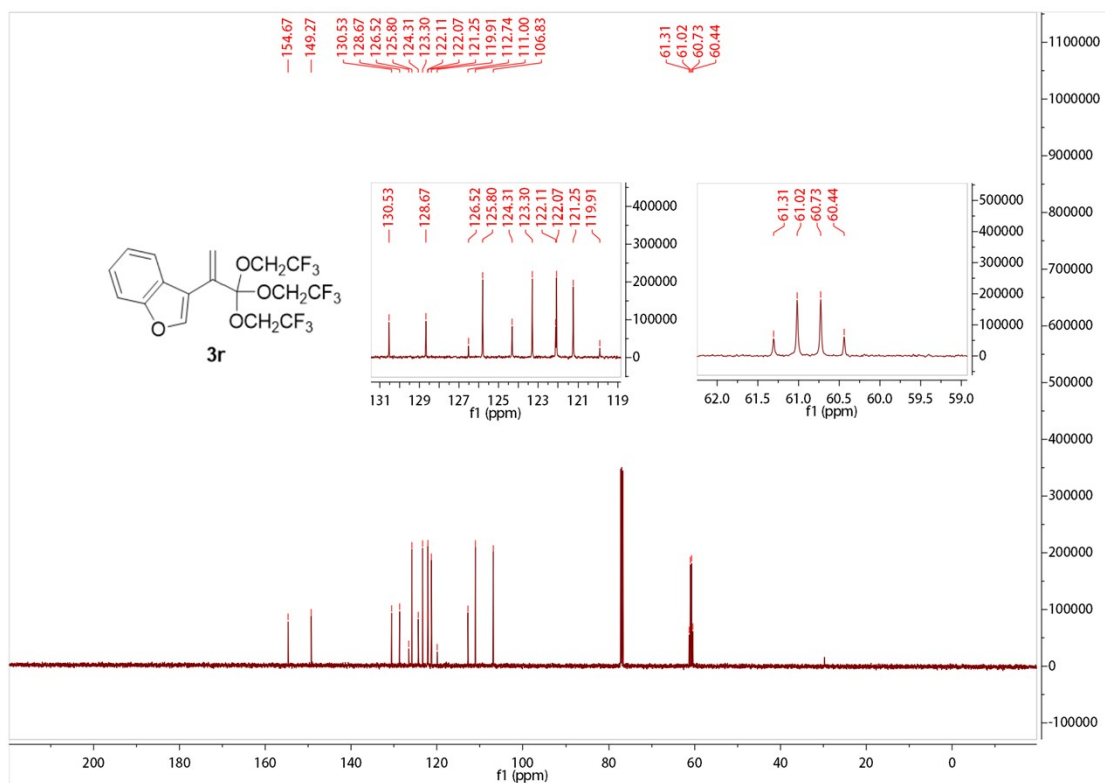

**<sup>19</sup>F NMR (471 MHz, CDCl<sub>3</sub>) spectrum for 3r**

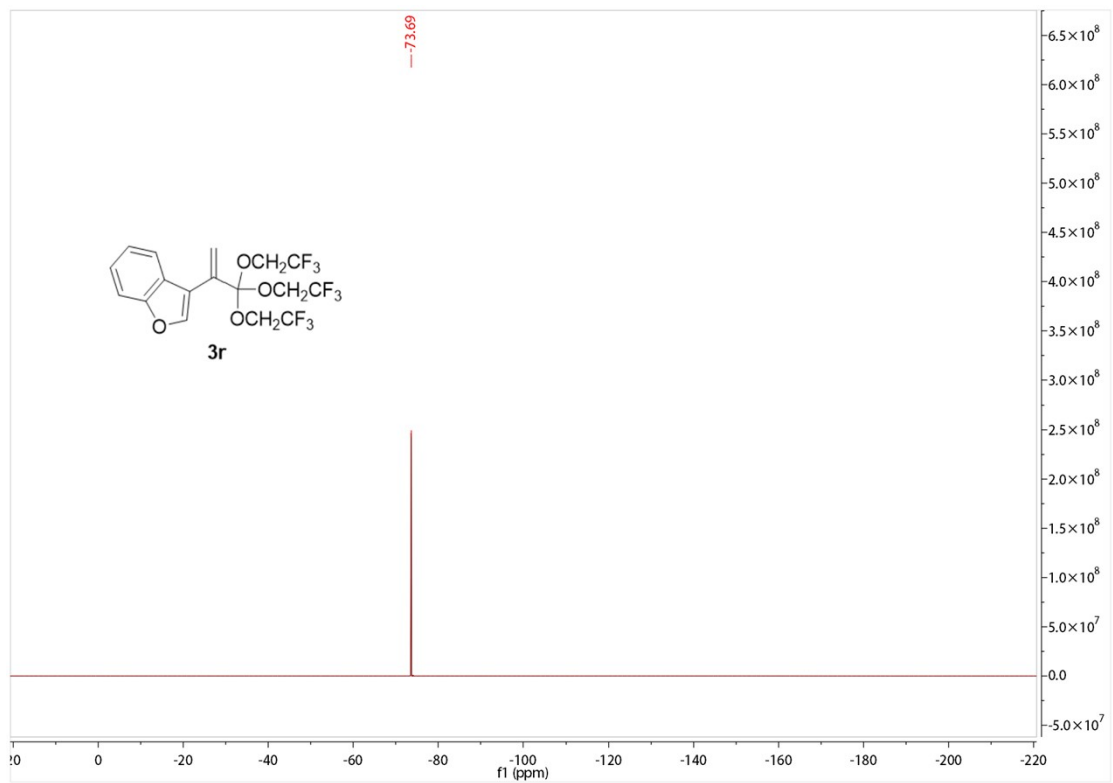

**<sup>1</sup>H NMR (500 MHz, CDCl<sub>3</sub>) spectrum for 3s**

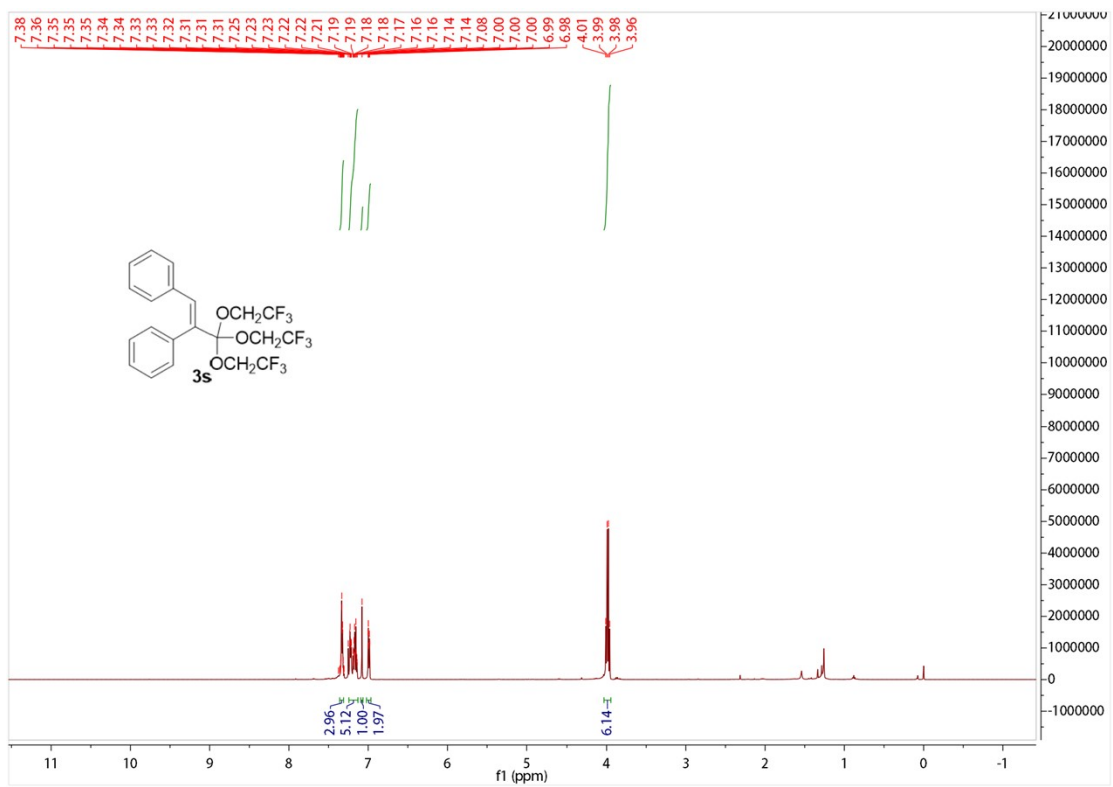

**<sup>13</sup>C NMR (126 MHz, CDCl<sub>3</sub>) spectrum for 3s**

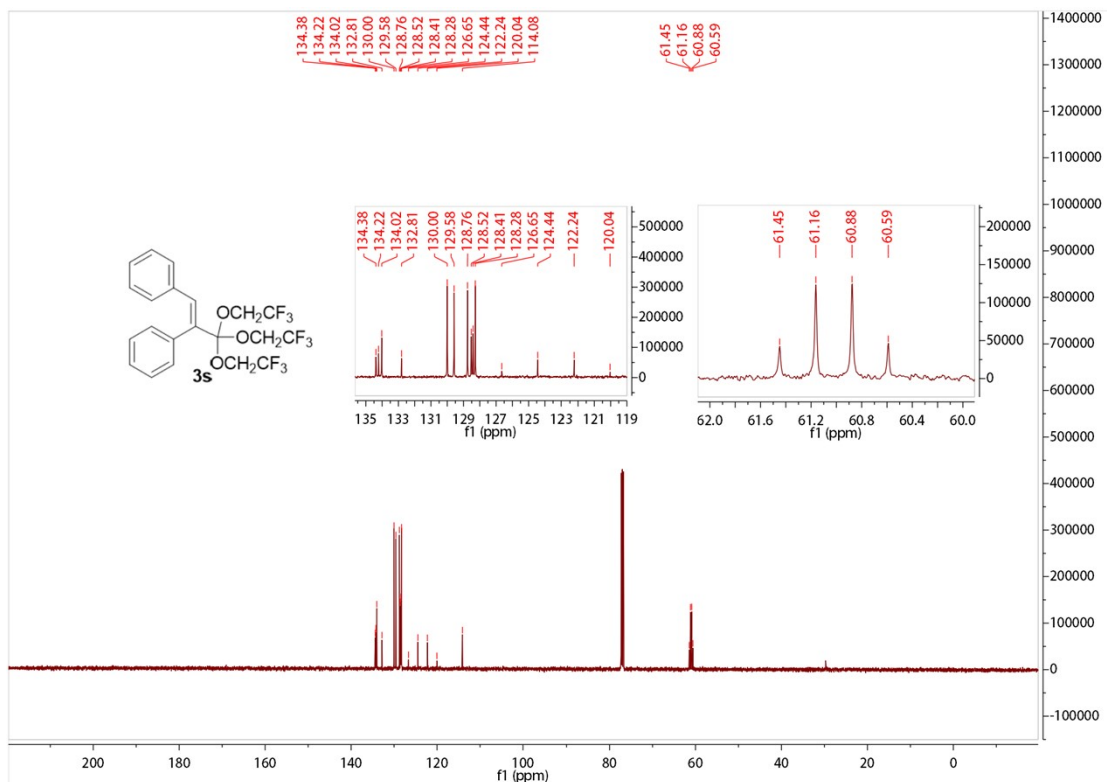

**<sup>19</sup>F NMR (471 MHz, CDCl<sub>3</sub>) spectrum for 3s**

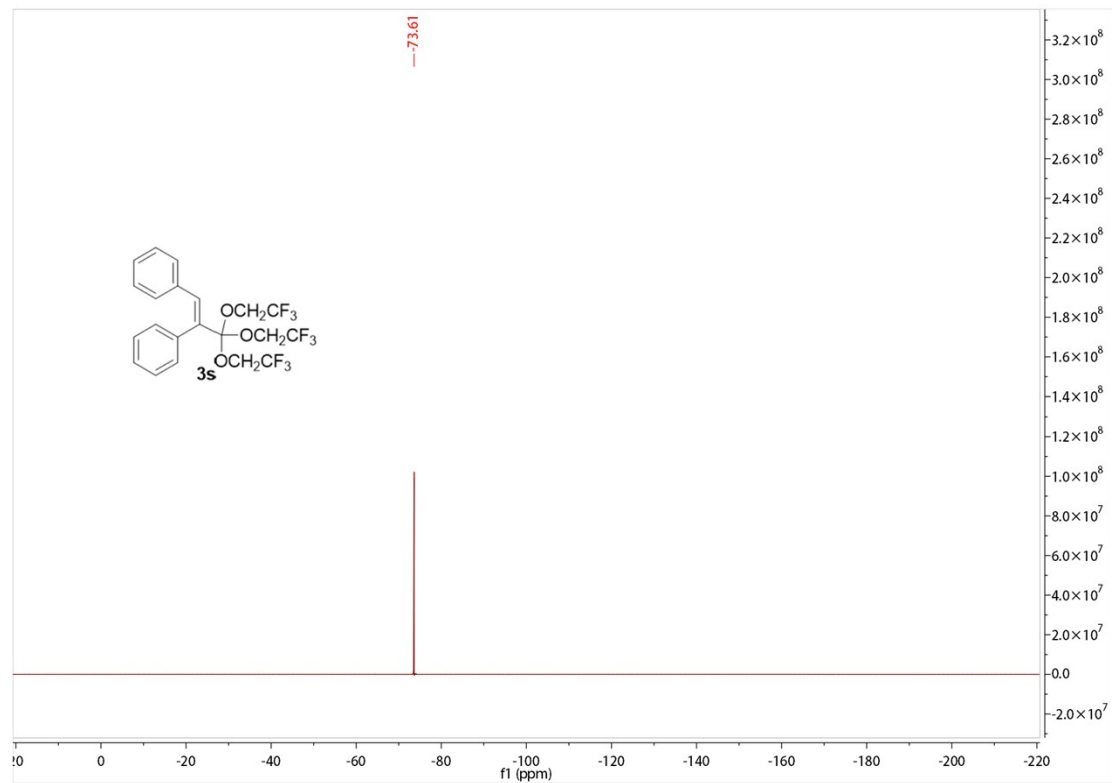

**<sup>1</sup>H NMR (500 MHz, CDCl<sub>3</sub>) spectrum for 3u**

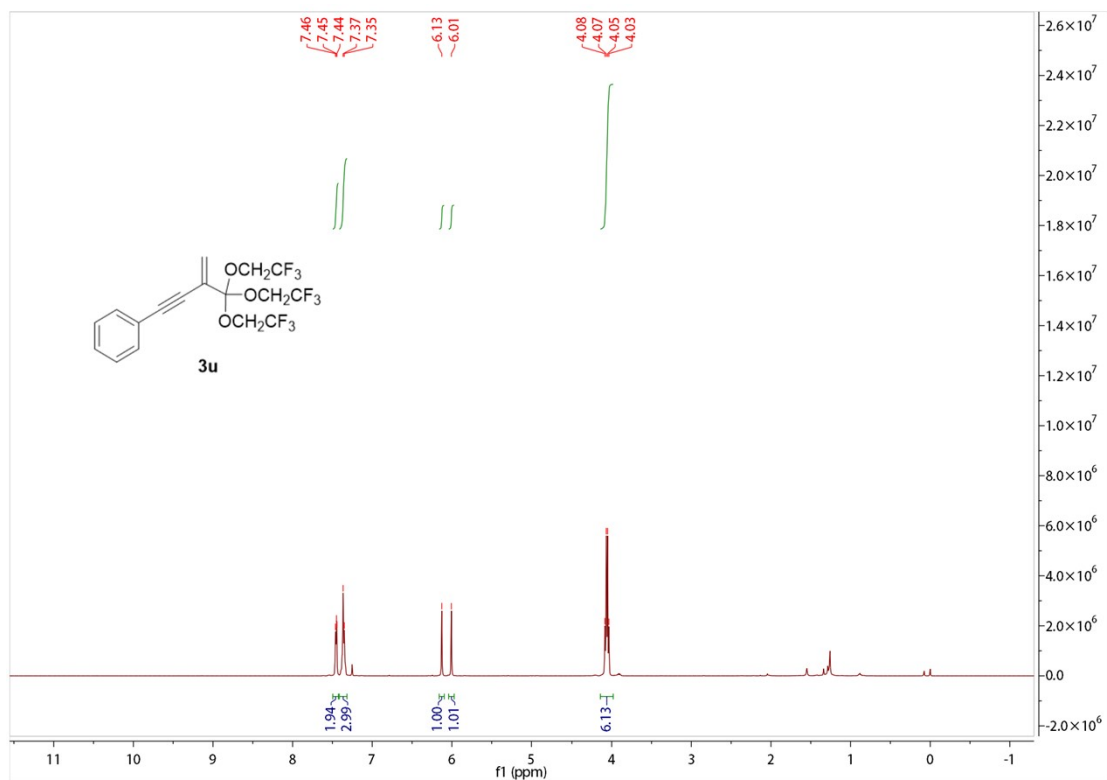

**<sup>13</sup>C NMR (126 MHz, CDCl<sub>3</sub>) spectrum for 3u**

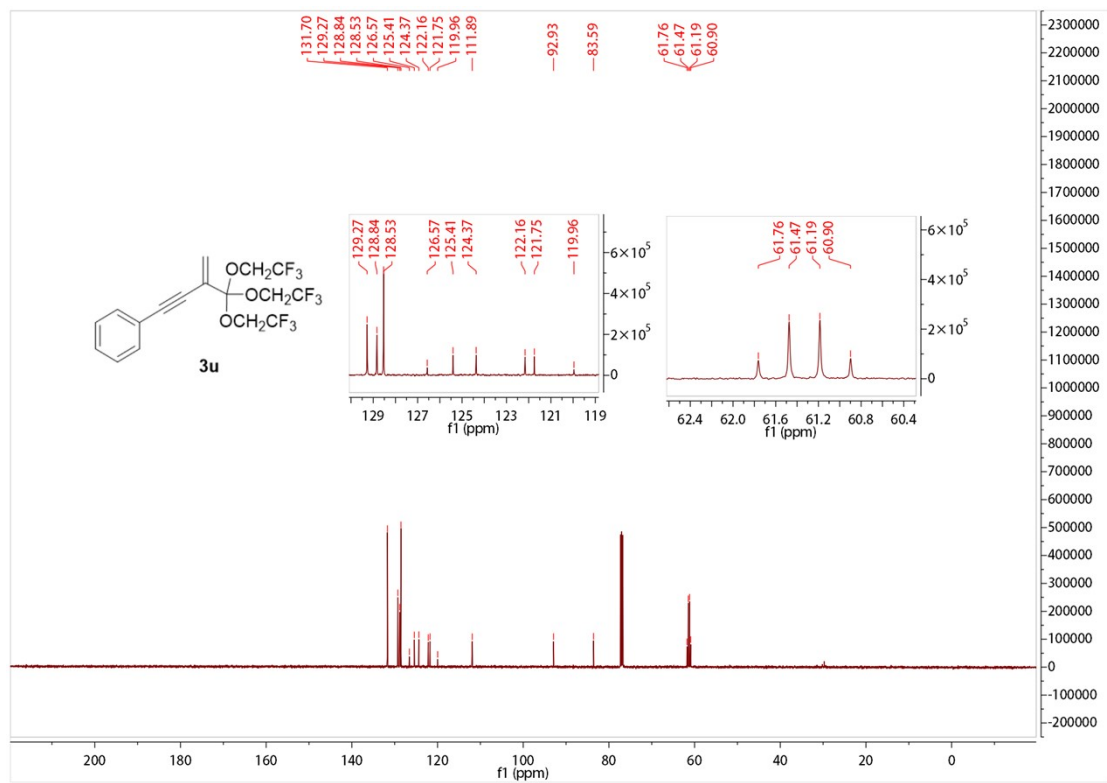

**<sup>19</sup>F NMR (471 MHz, CDCl<sub>3</sub>) spectrum for 3u**



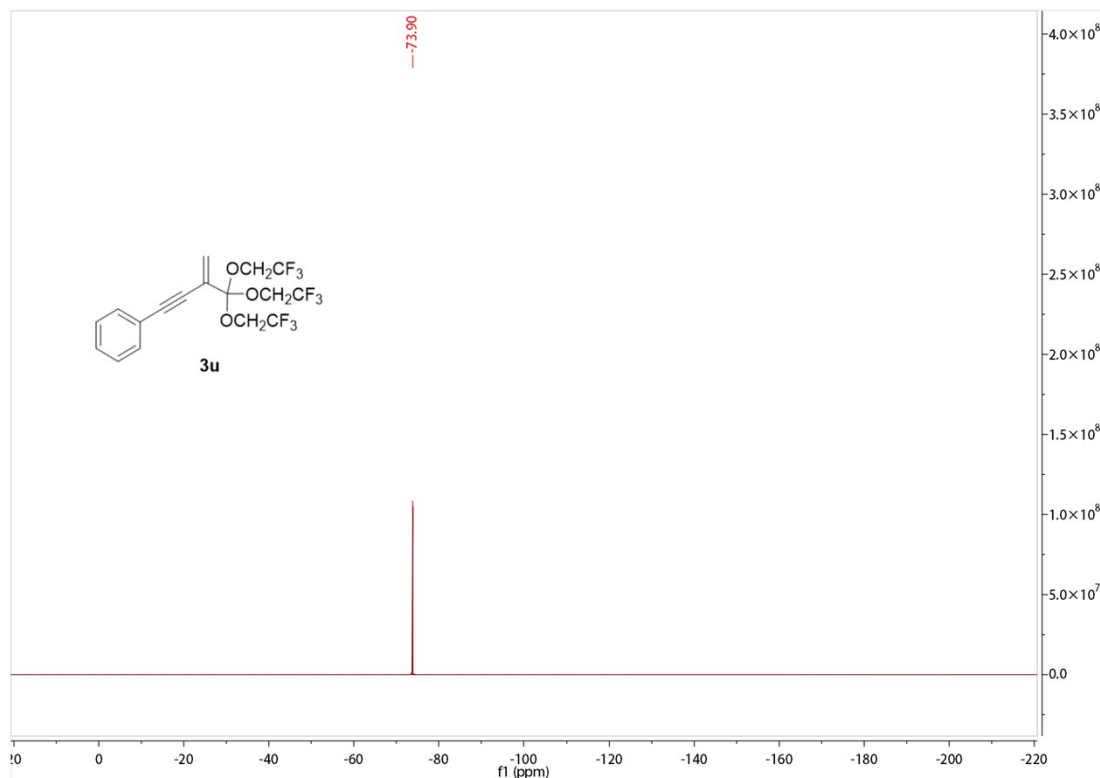

$^1\text{H}$  NMR (500 MHz,  $\text{CDCl}_3$ ) spectrum for **3v'**

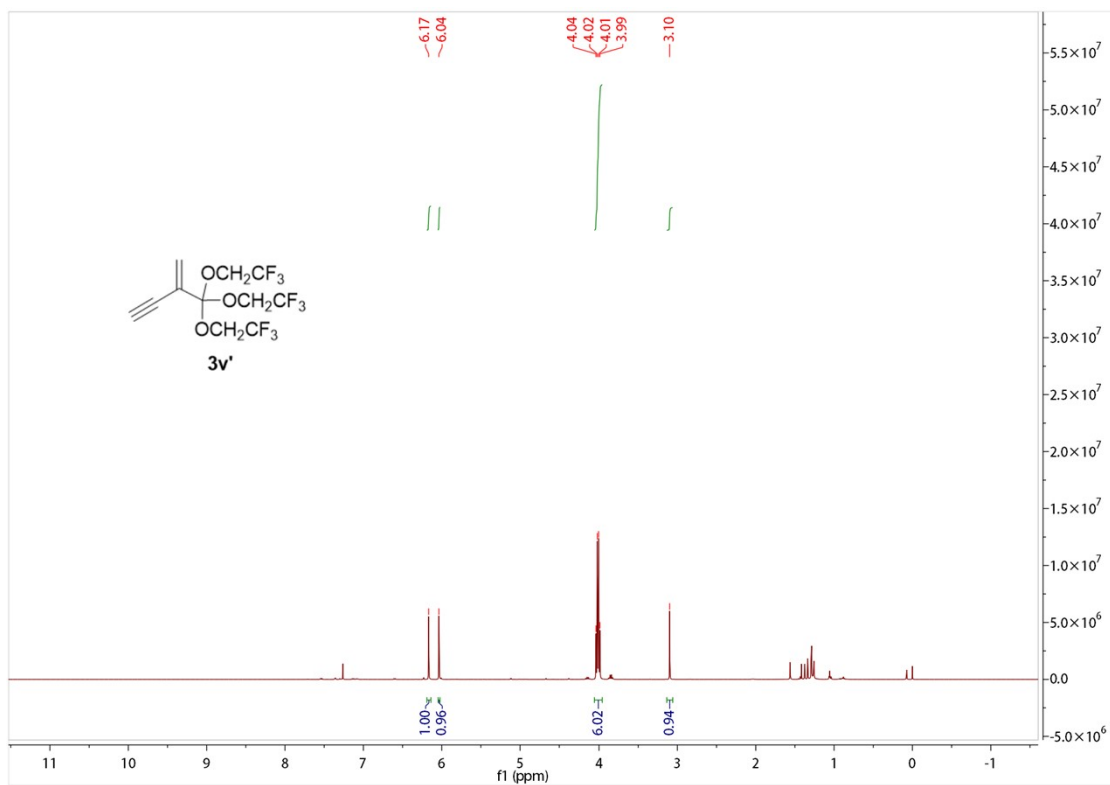

$^{13}\text{C}$  NMR (126 MHz,  $\text{CDCl}_3$ ) spectrum for **3v'**

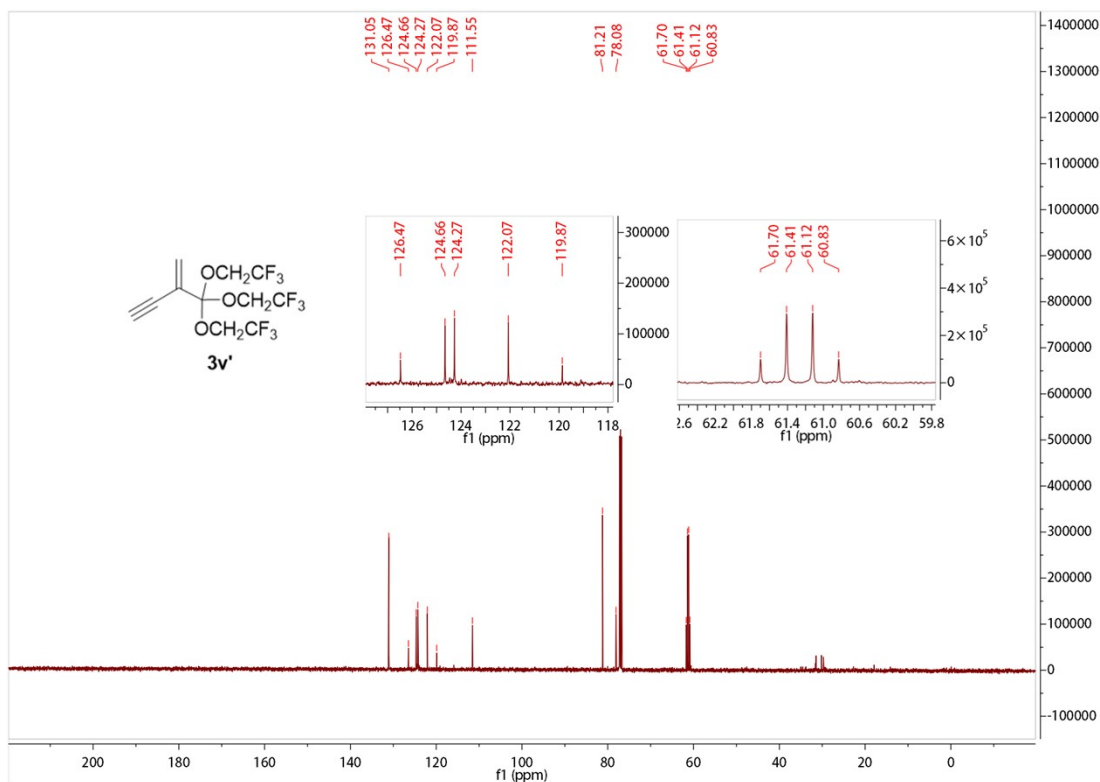

**<sup>19</sup>F NMR (471 MHz, CDCl<sub>3</sub>) spectrum for 3v'**

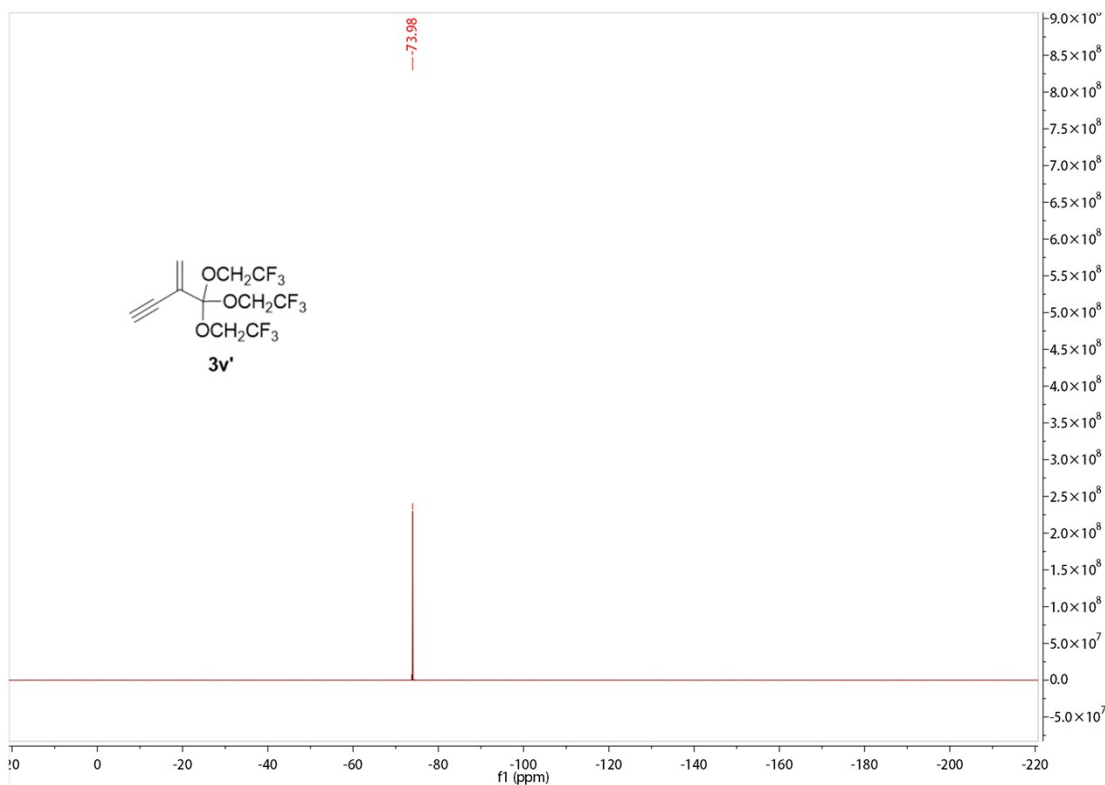

**<sup>1</sup>H NMR (500 MHz, CDCl<sub>3</sub>) spectrum for 3y**

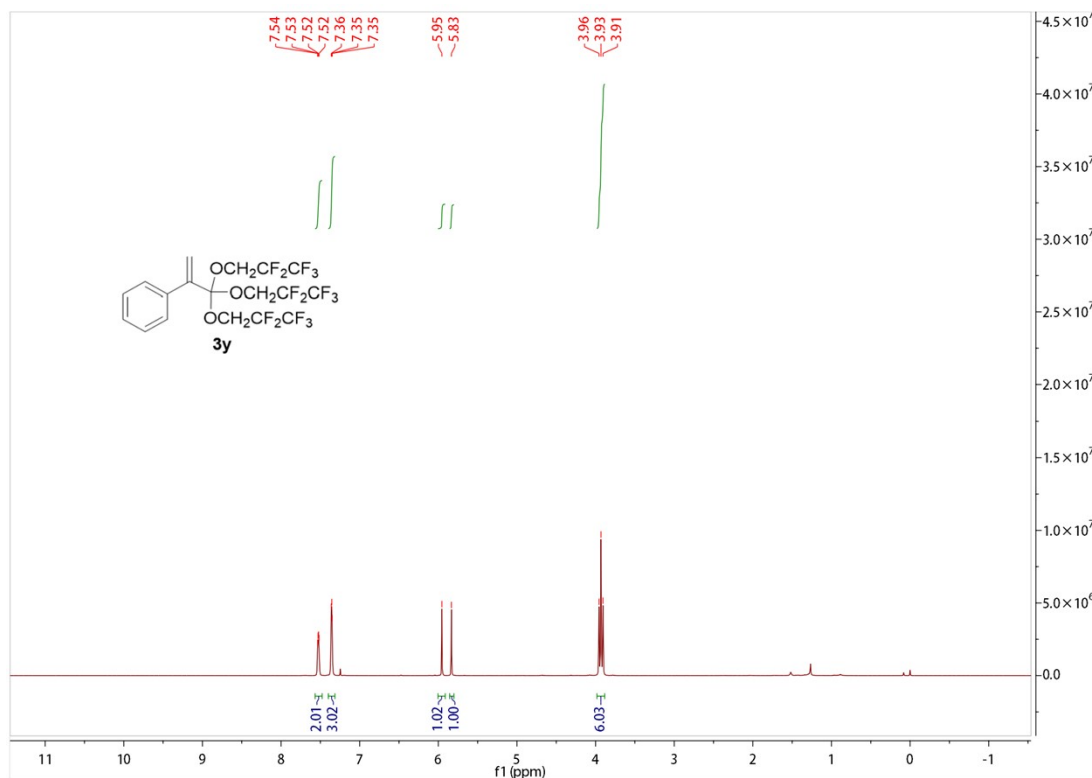

**<sup>13</sup>C NMR (126 MHz, CDCl<sub>3</sub>) spectrum for 3y**

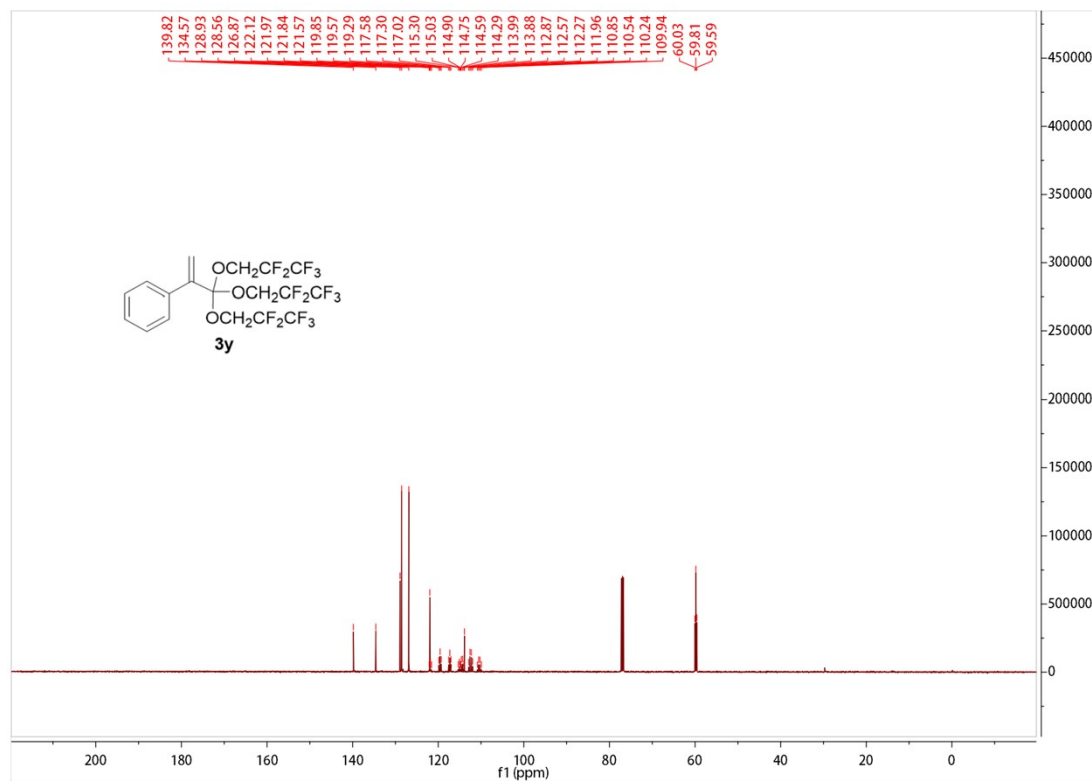

**<sup>19</sup>F NMR (471 MHz, CDCl<sub>3</sub>) spectrum for 3y**

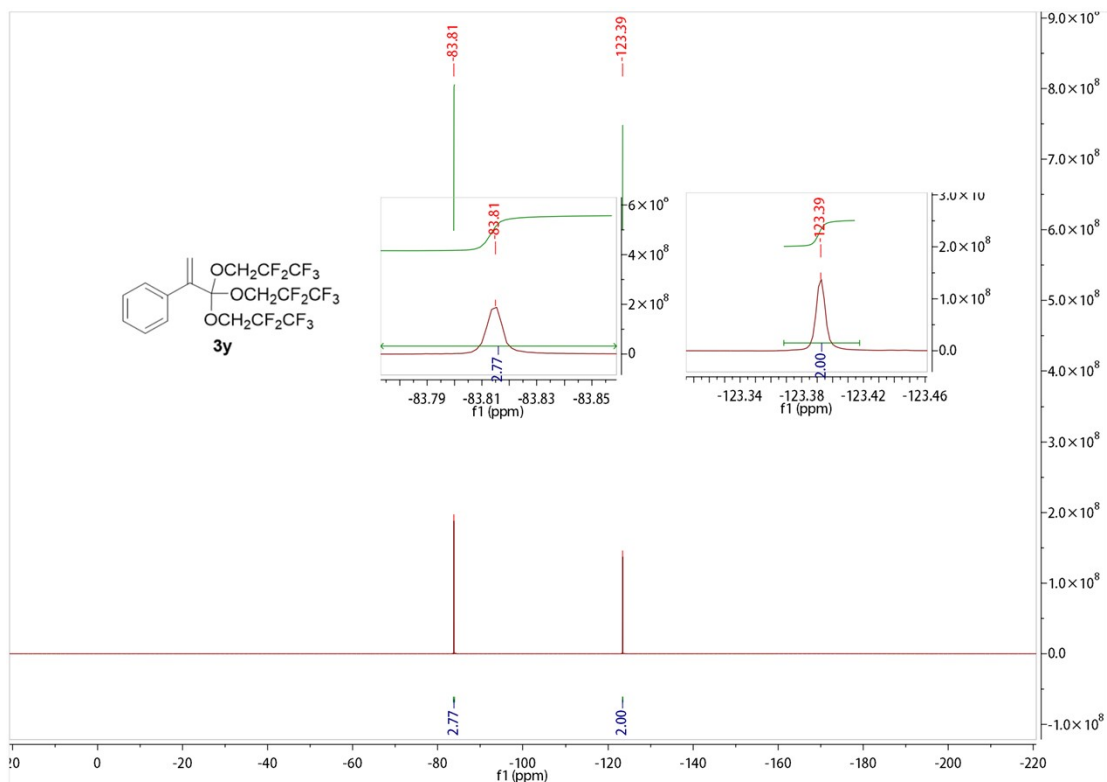

**<sup>1</sup>H NMR (500 MHz, CDCl<sub>3</sub>) spectrum for 3z**

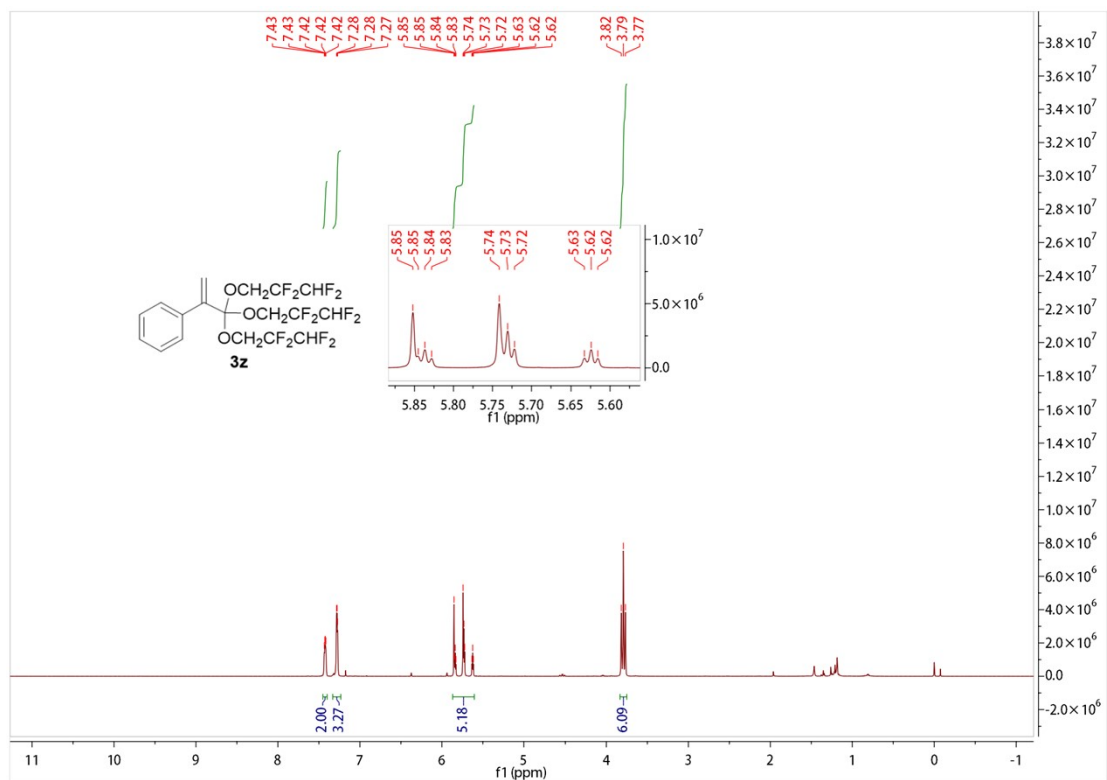

**<sup>13</sup>C NMR (126 MHz, CDCl<sub>3</sub>) spectrum for 3z**

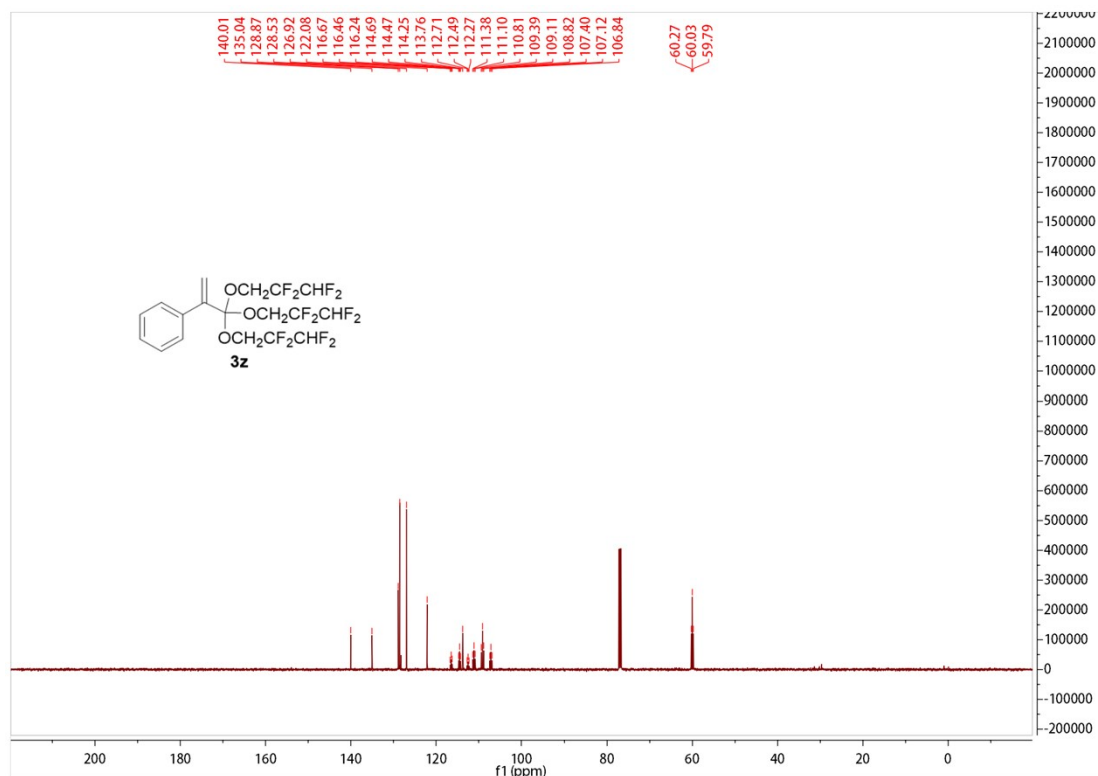

**<sup>19</sup>F NMR (471 MHz, CDCl<sub>3</sub>) spectrum for 3z**

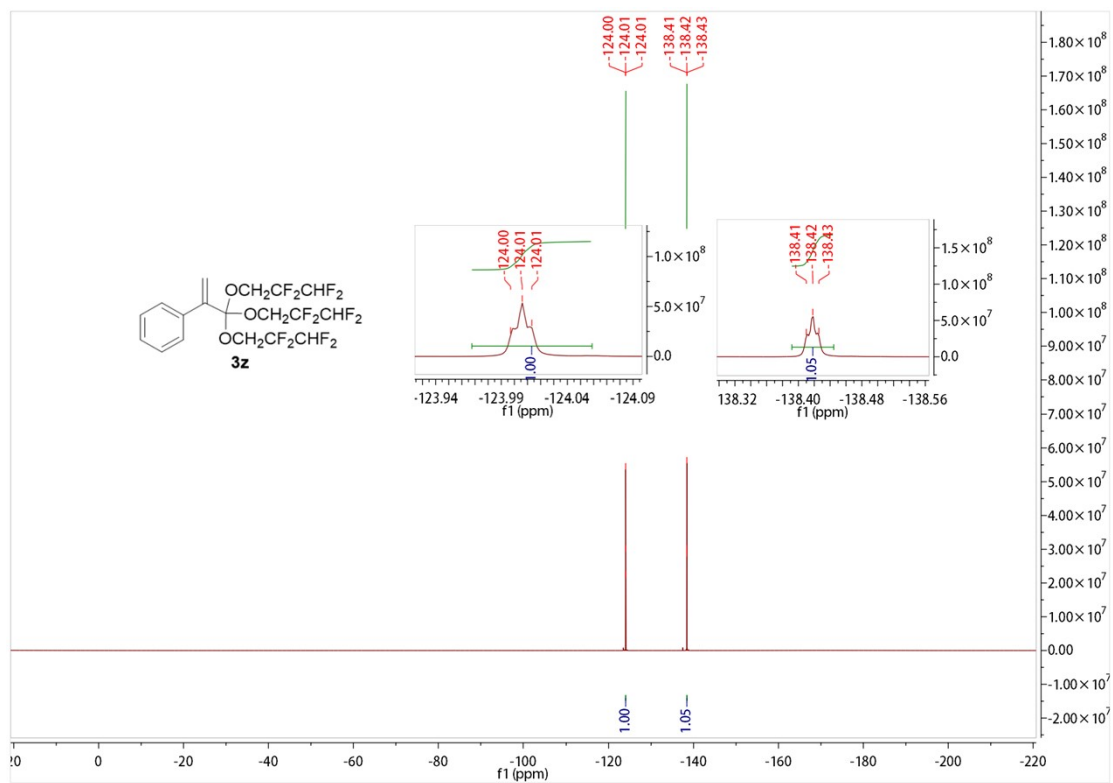

**<sup>1</sup>H NMR (500 MHz, CDCl<sub>3</sub>) spectrum for 3aa**

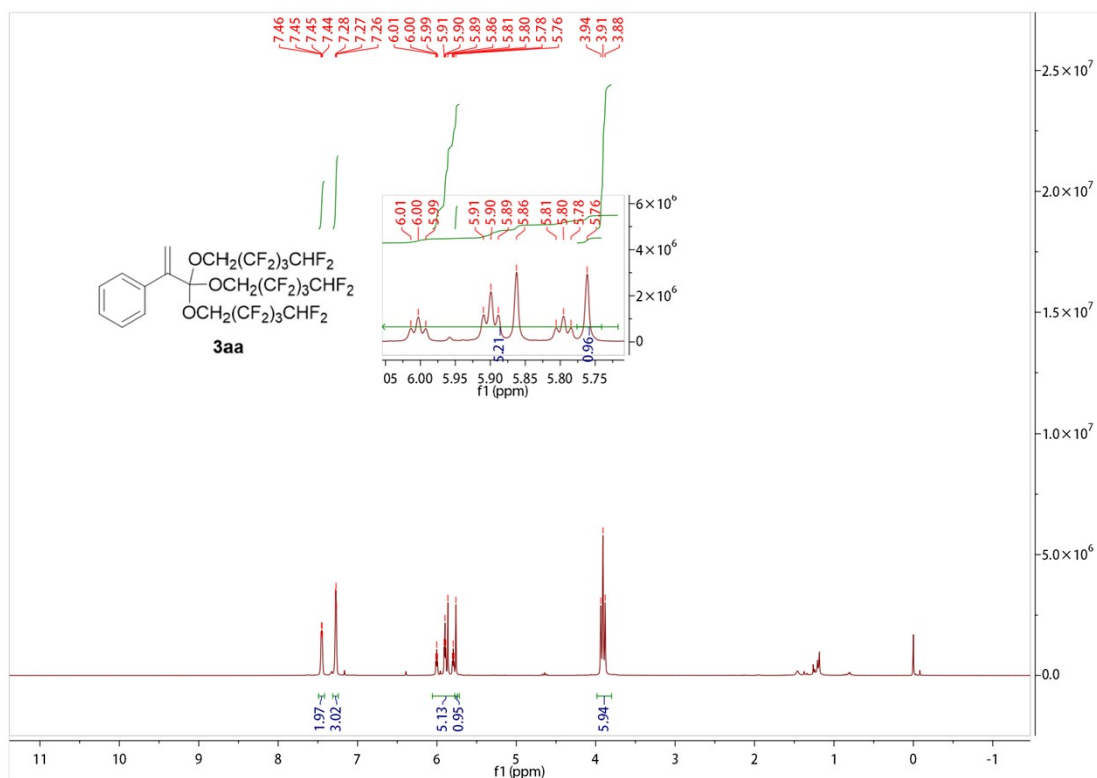

**<sup>13</sup>C NMR (126 MHz, CDCl<sub>3</sub>) spectrum for 3aa**

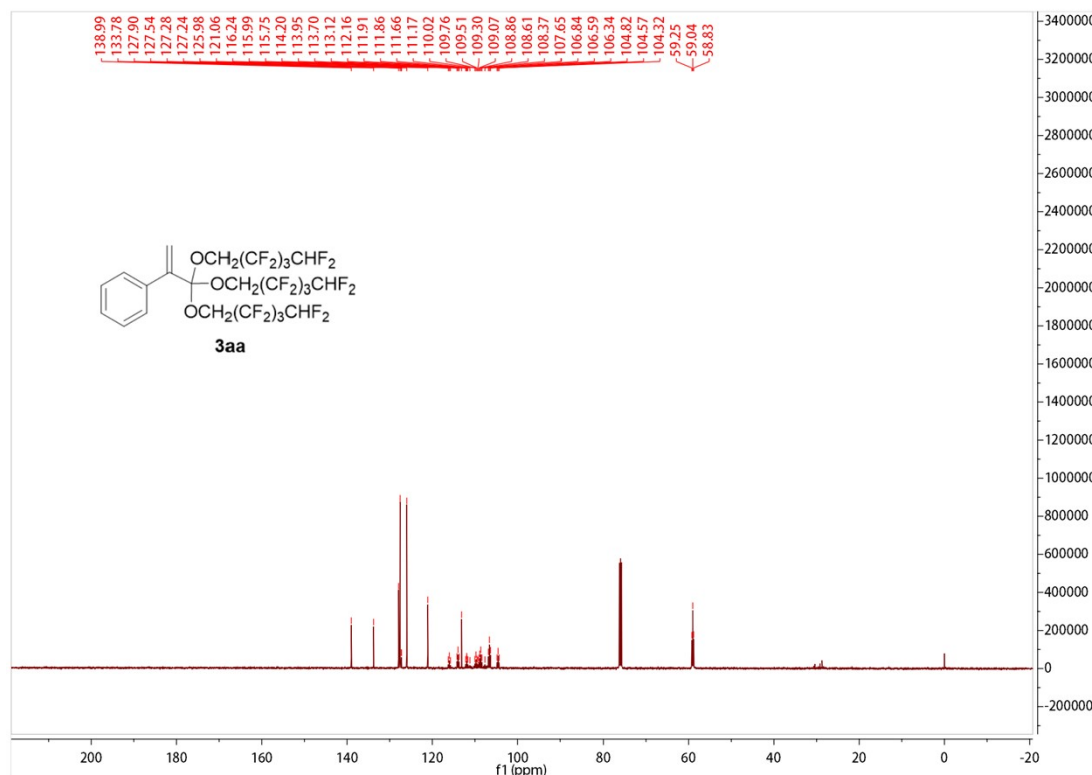

**<sup>19</sup>F NMR (471 MHz, CDCl<sub>3</sub>) spectrum for 3aa**

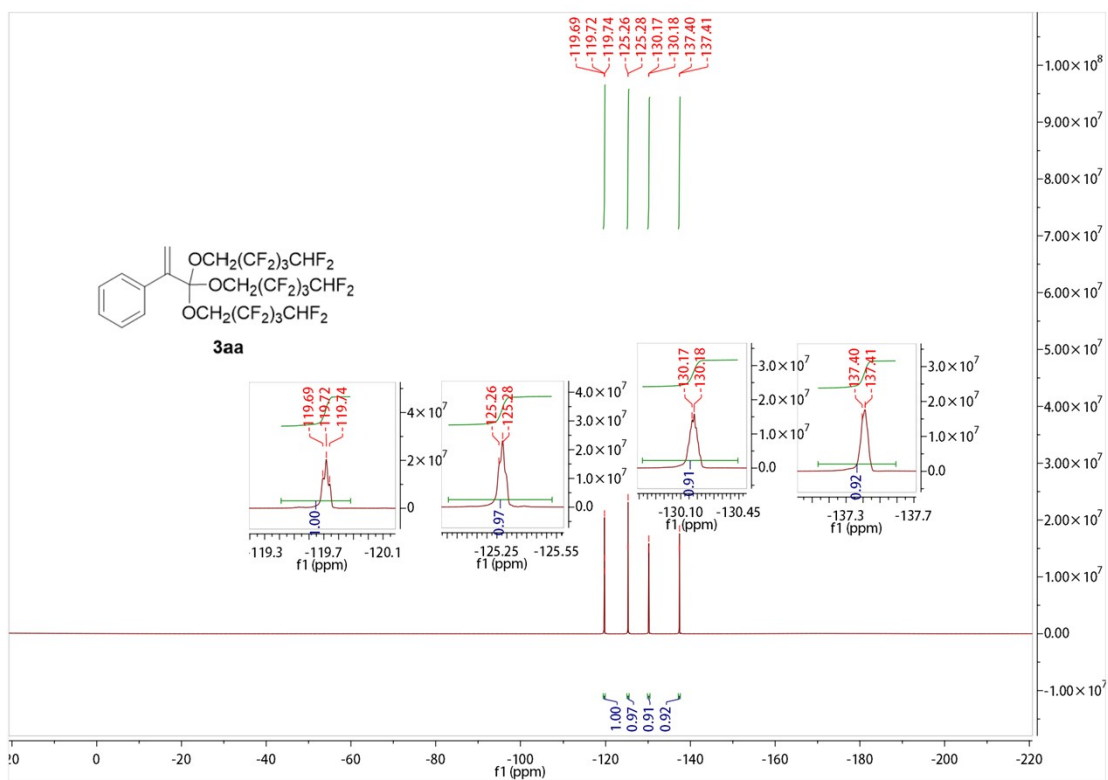

$^1\text{H}$  NMR (500 MHz,  $\text{CDCl}_3$ ) spectrum for **3ab**

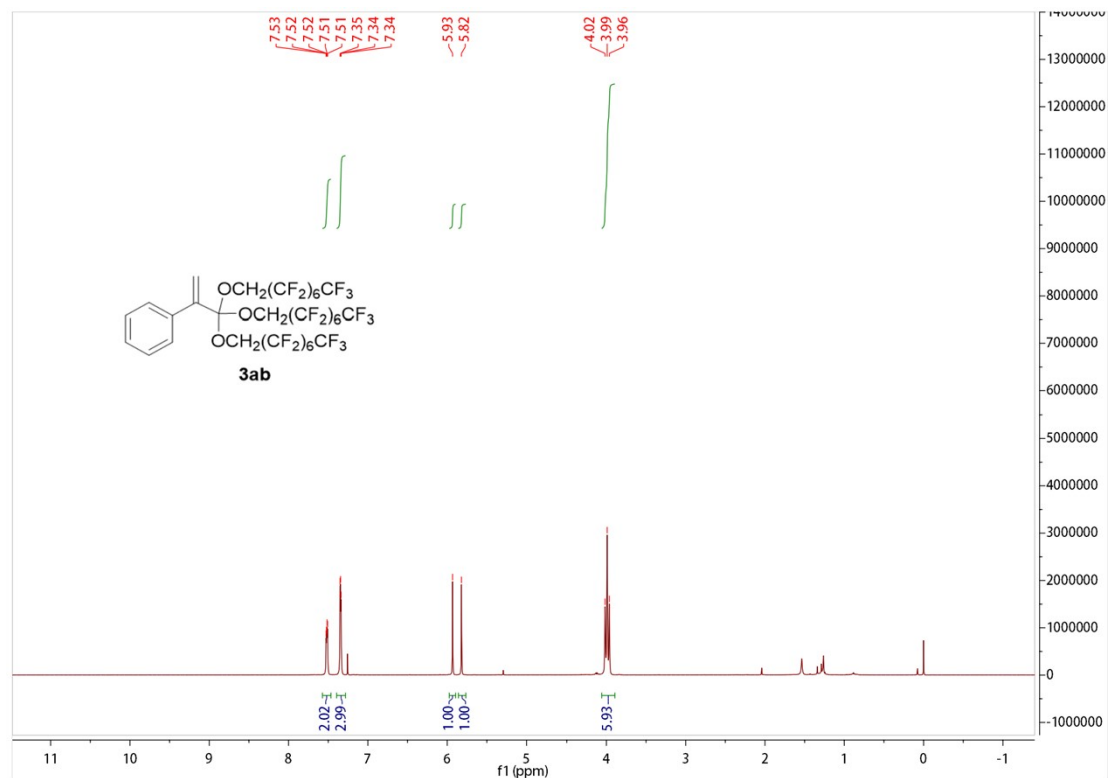

$^{13}\text{C}$  NMR (126 MHz,  $\text{CDCl}_3$ ) spectrum for **3ab**

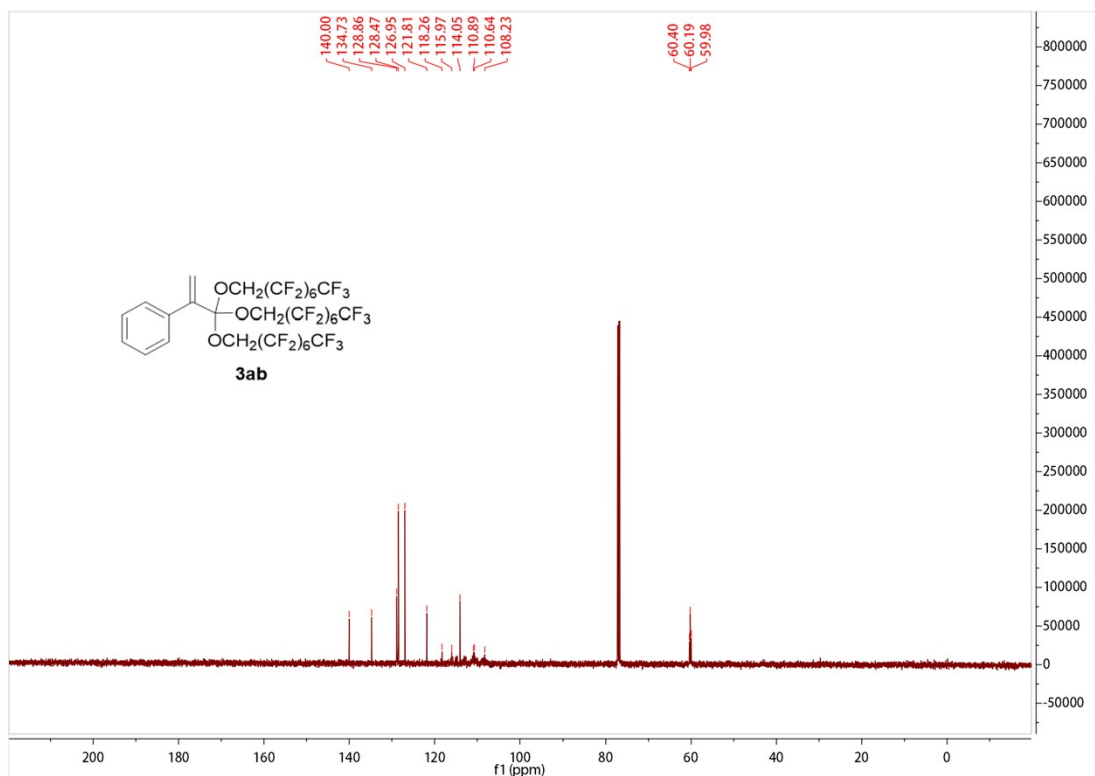

**<sup>19</sup>F NMR (471 MHz, CDCl<sub>3</sub>) spectrum for 3ab**

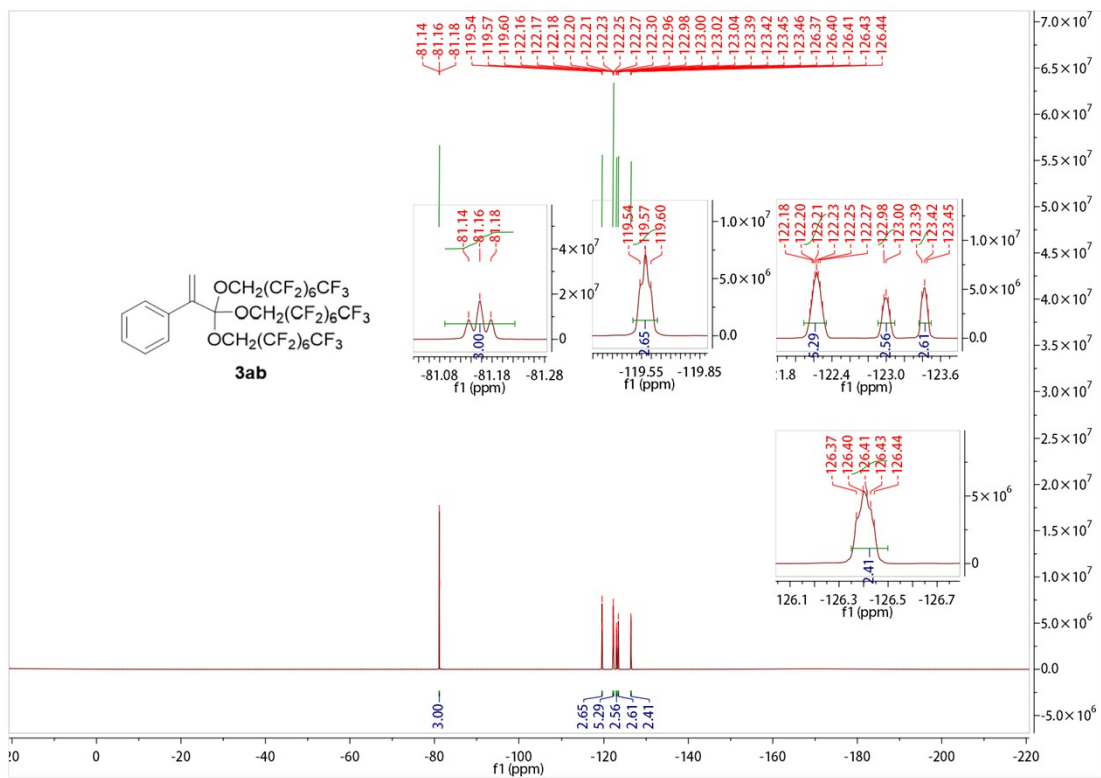

**<sup>1</sup>H NMR (500 MHz, CDCl<sub>3</sub>) spectrum for 3af**



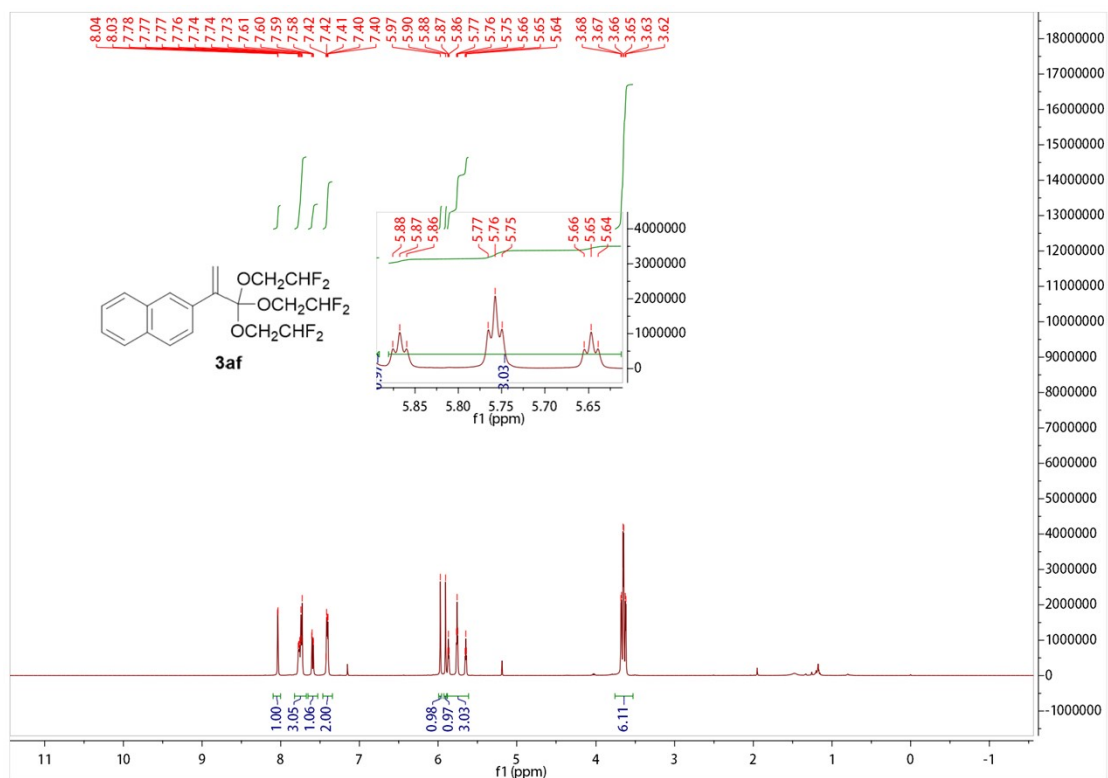

**<sup>13</sup>C NMR (126 MHz, CDCl<sub>3</sub>) spectrum for 3af**

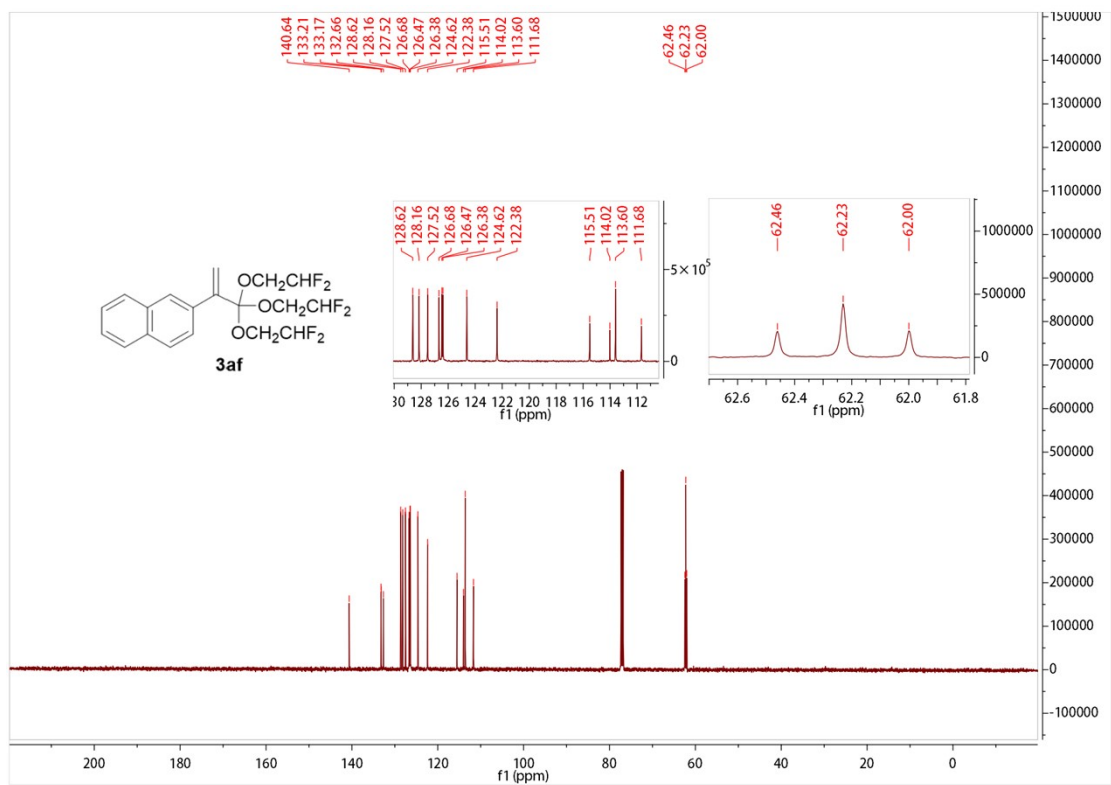

**<sup>19</sup>F NMR (471 MHz, CDCl<sub>3</sub>) spectrum for 3af**

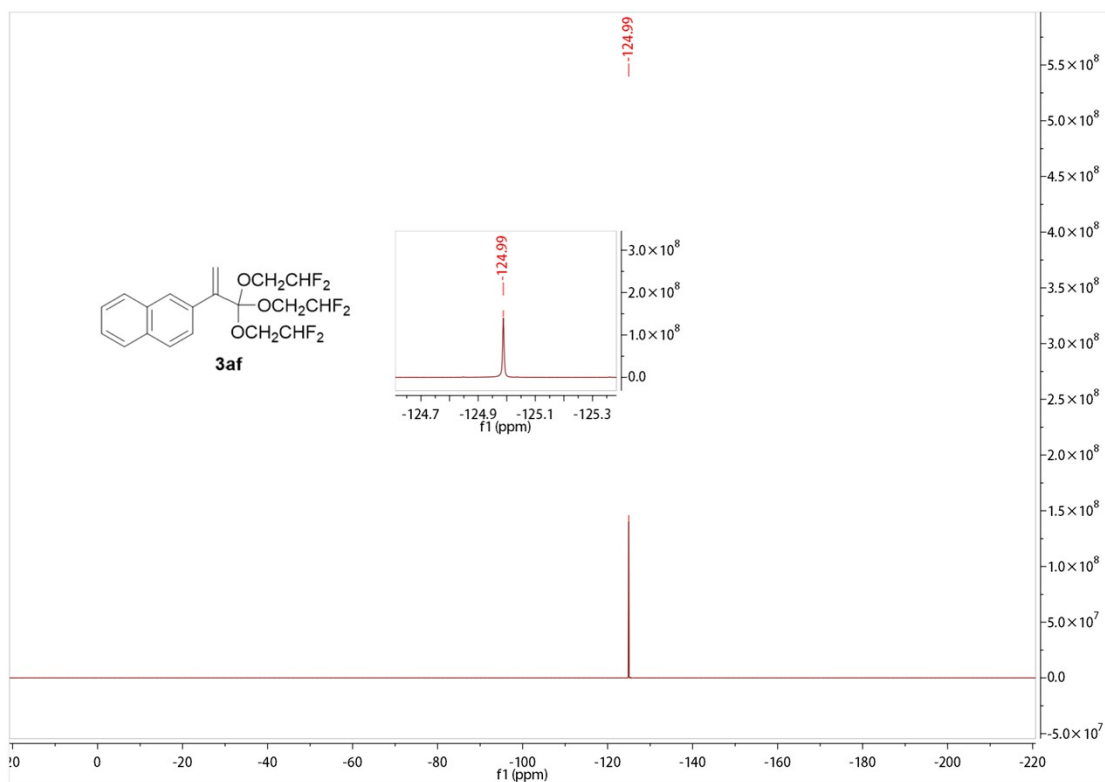

$^1\text{H}$  NMR (500 MHz,  $\text{CDCl}_3$ ) spectrum for **3ah'**

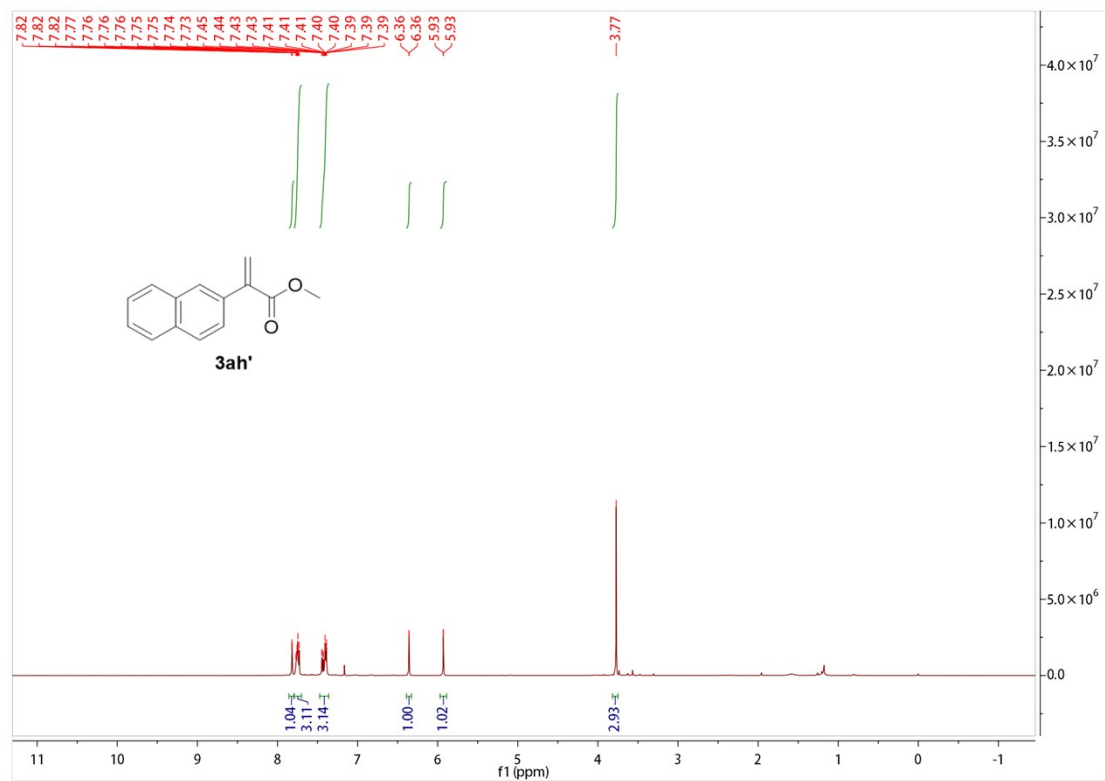

$^1\text{H}$  NMR (500 MHz,  $\text{CDCl}_3$ ) spectrum for **3ai'**

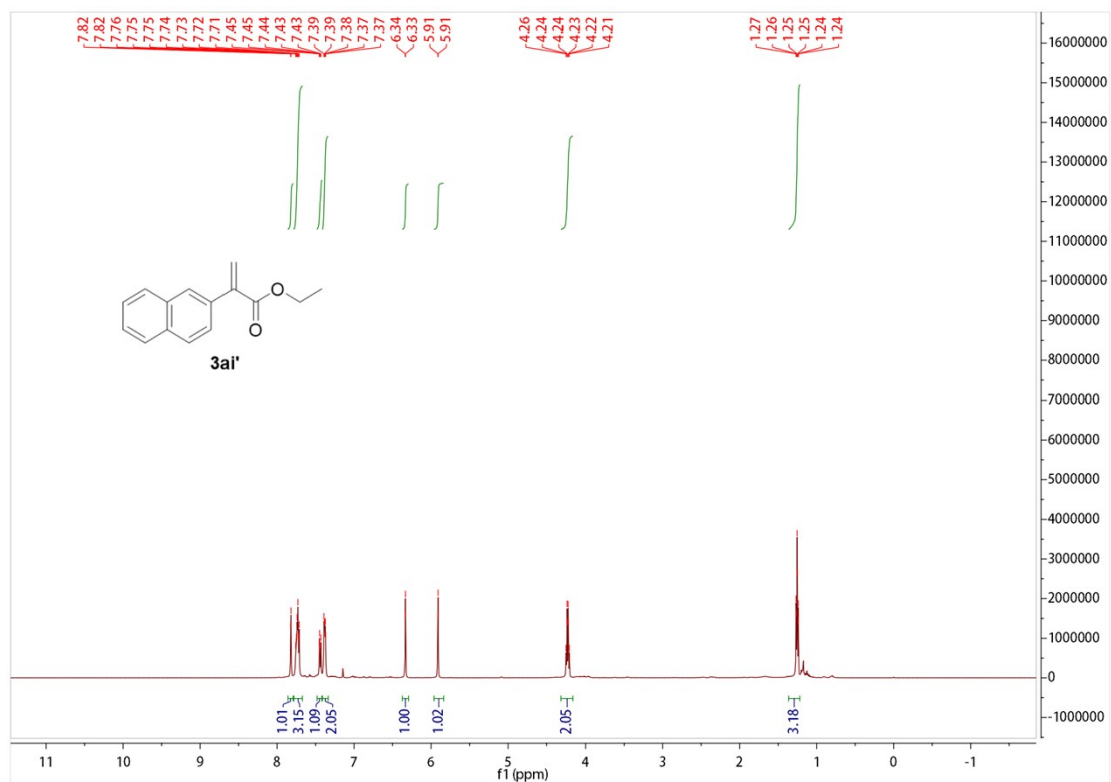

**<sup>1</sup>H NMR (500 MHz, CDCl<sub>3</sub>) spectrum for 3aj**

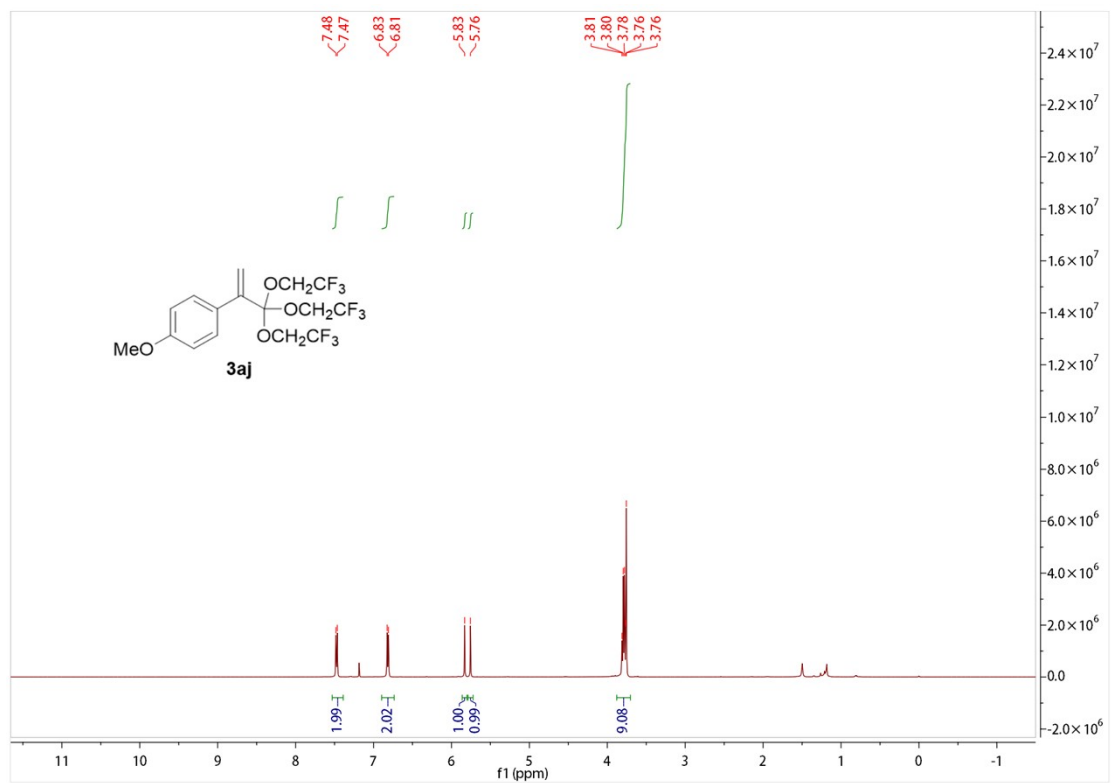

**<sup>13</sup>C NMR (126 MHz, CDCl<sub>3</sub>) spectrum for 3aj**

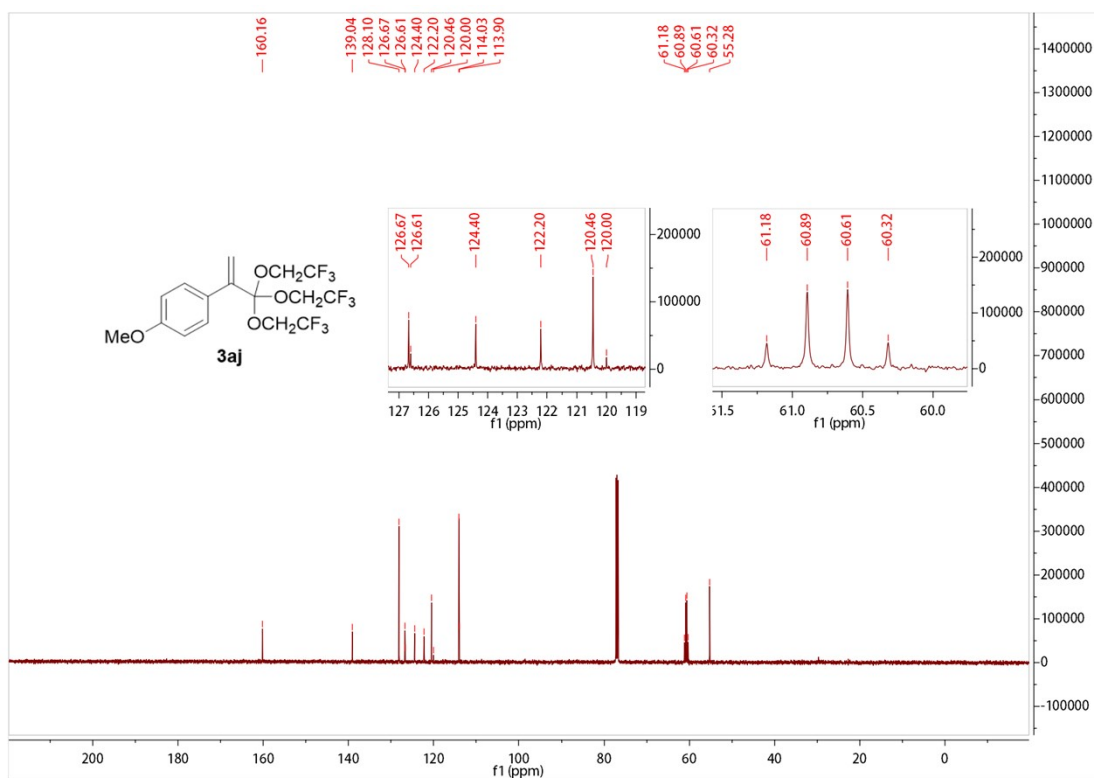

**<sup>19</sup>F NMR (376 MHz, CDCl<sub>3</sub>) spectrum for 3aj**

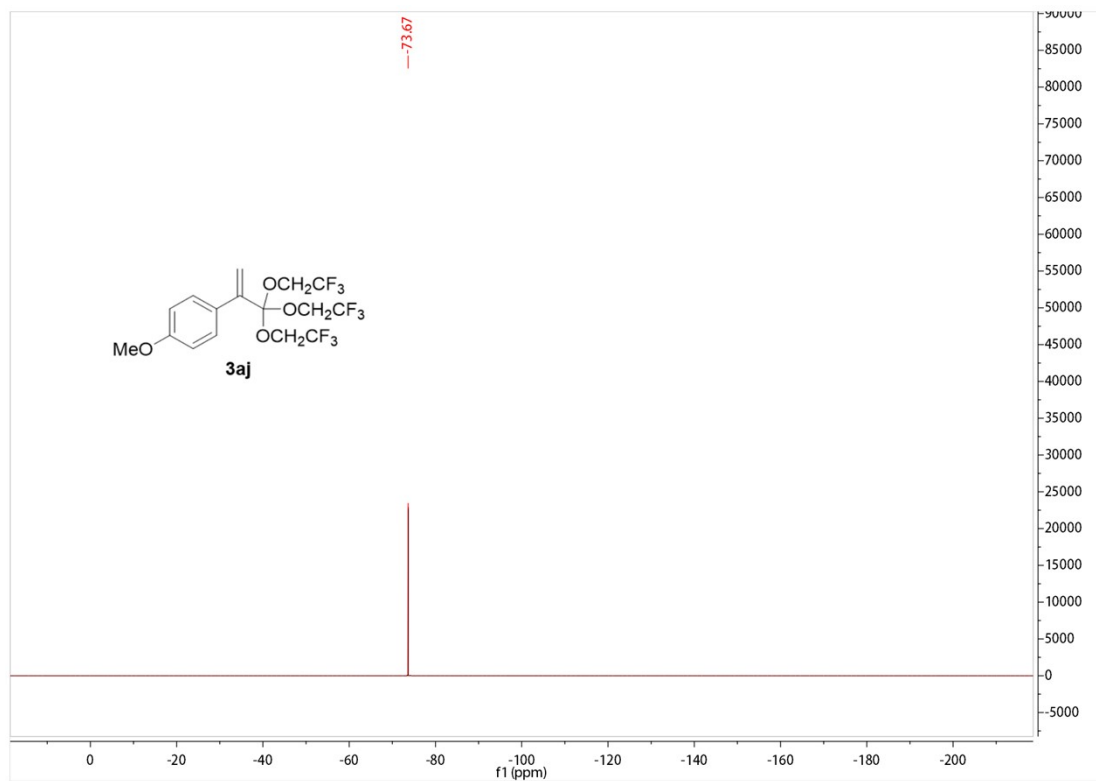

**<sup>1</sup>H NMR (500 MHz, CDCl<sub>3</sub>) spectrum for 3aj'**

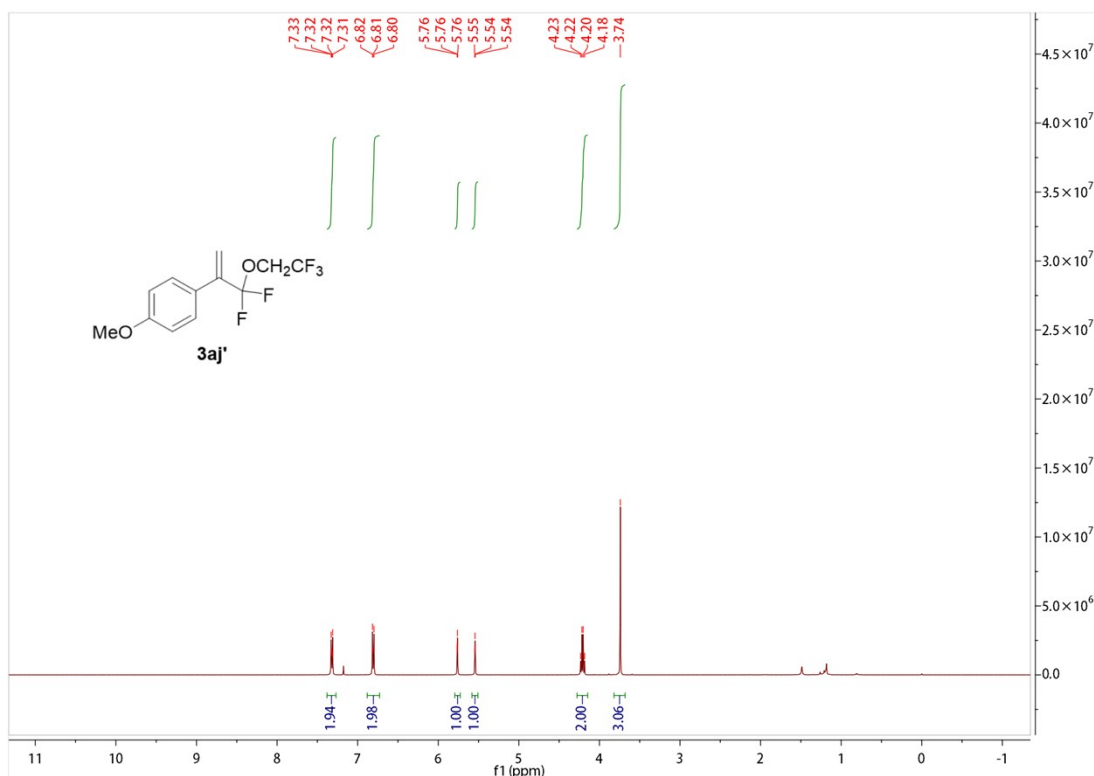

**<sup>13</sup>C NMR (126 MHz, CDCl<sub>3</sub>) spectrum for 3aj'**

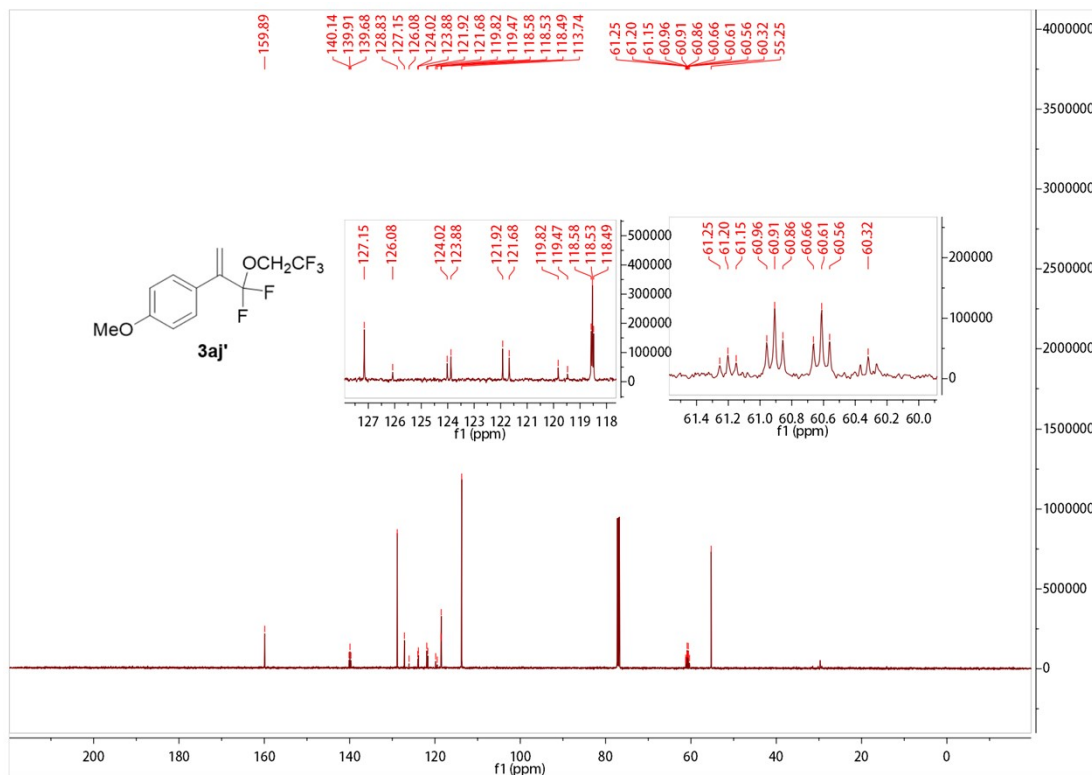

**<sup>19</sup>F NMR (471 MHz, CDCl<sub>3</sub>) spectrum for 3aj'**

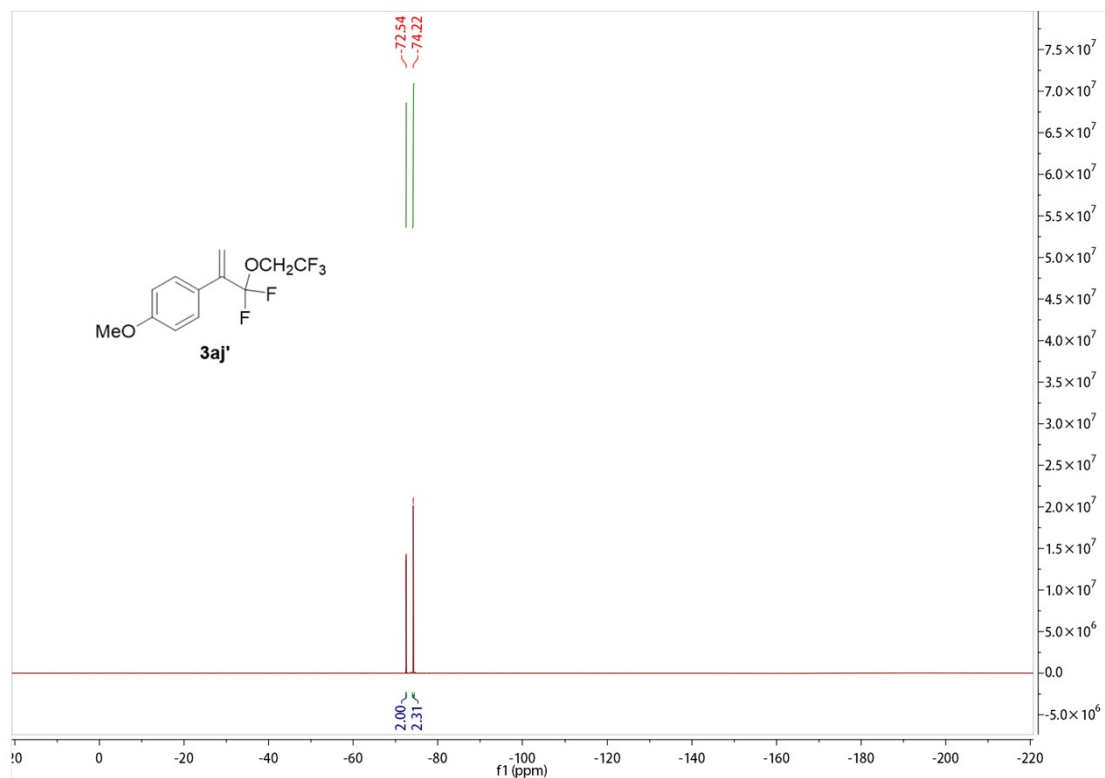

**<sup>1</sup>H NMR (400 MHz, CDCl<sub>3</sub>) spectrum for 3aj''**

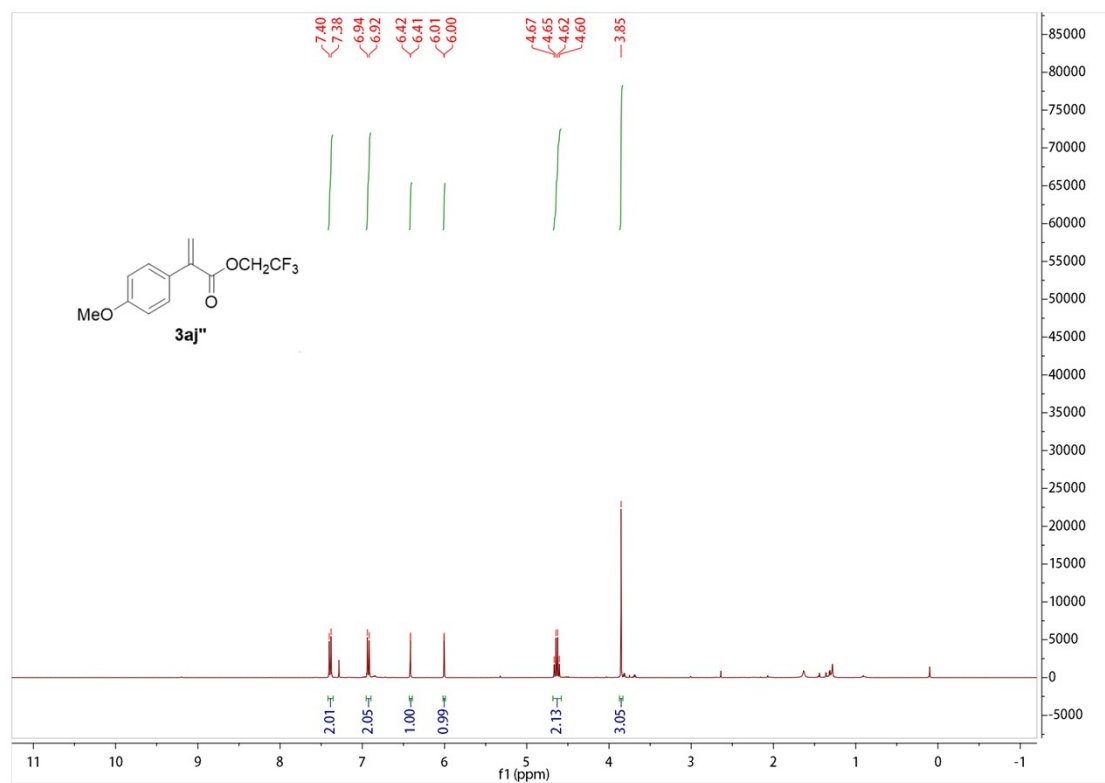

**<sup>13</sup>C NMR (126 MHz, CDCl<sub>3</sub>) spectrum for 3aj''**

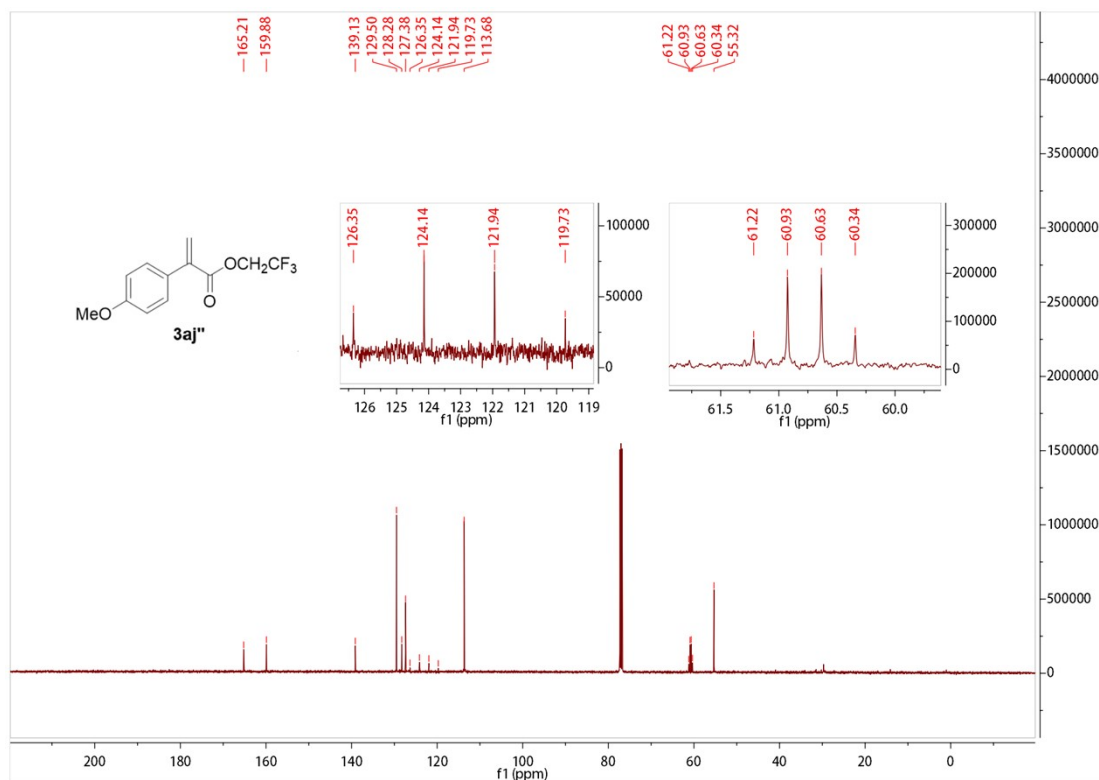

**<sup>19</sup>F NMR (376 MHz, CDCl<sub>3</sub>) spectrum for 3aj''**

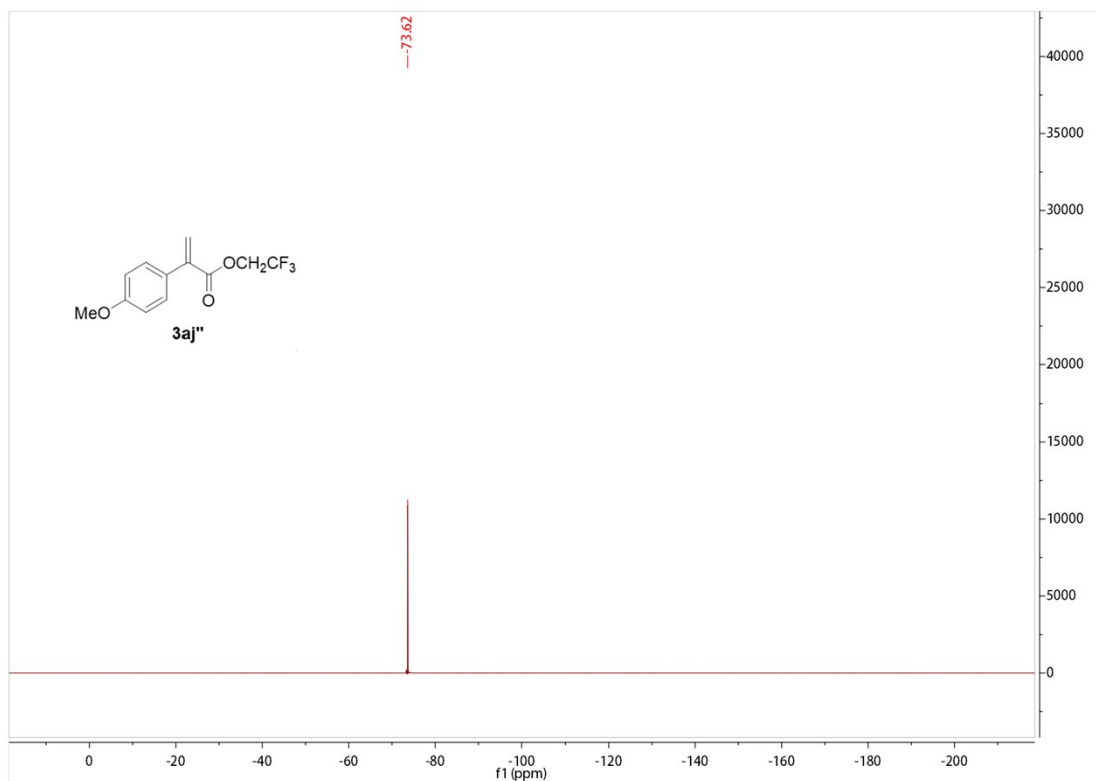

**<sup>1</sup>H NMR (500 MHz, CDCl<sub>3</sub>) spectrum for 4**

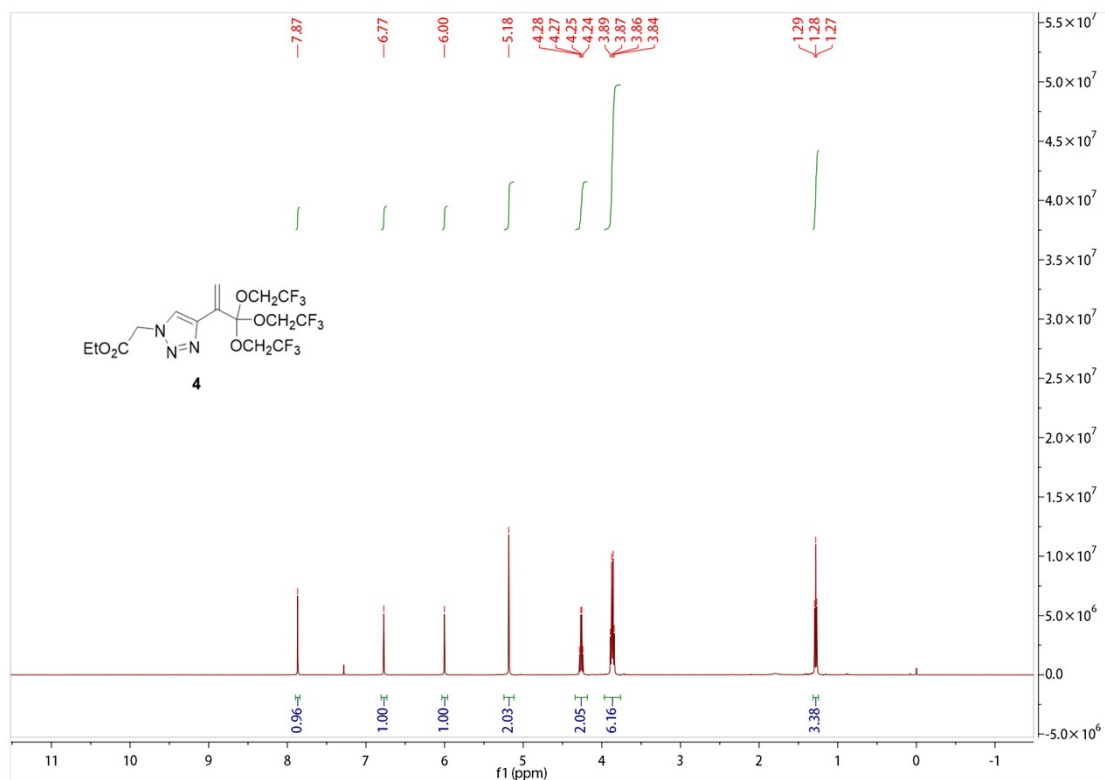

<sup>13</sup>C NMR (126 MHz, CDCl<sub>3</sub>) spectrum for 4

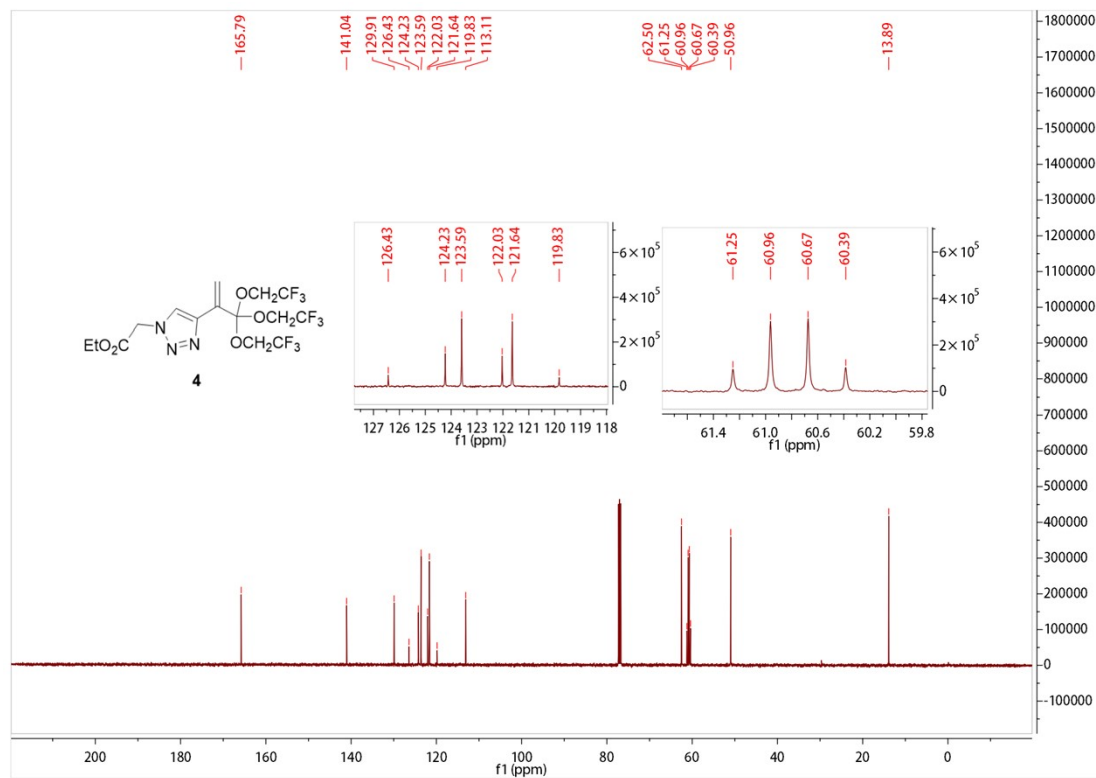

<sup>19</sup>F NMR (471 MHz, CDCl<sub>3</sub>) spectrum for 4



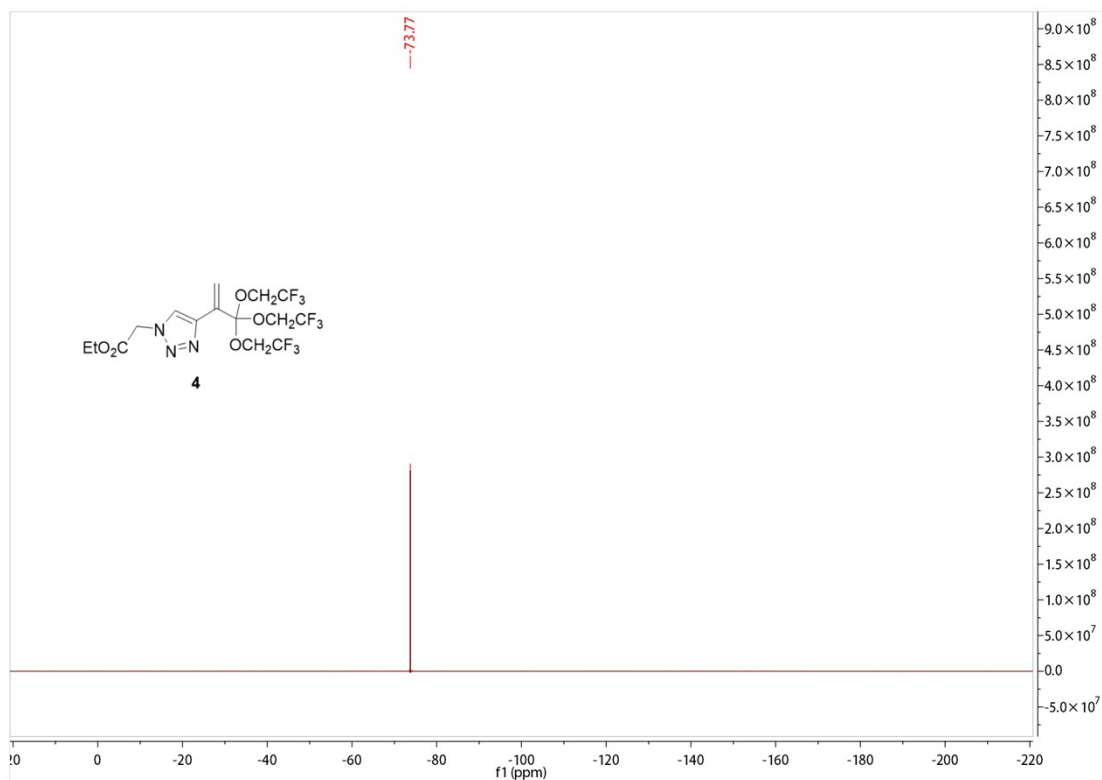

**<sup>1</sup>H NMR (500 MHz, CDCl<sub>3</sub>) spectrum for 5**

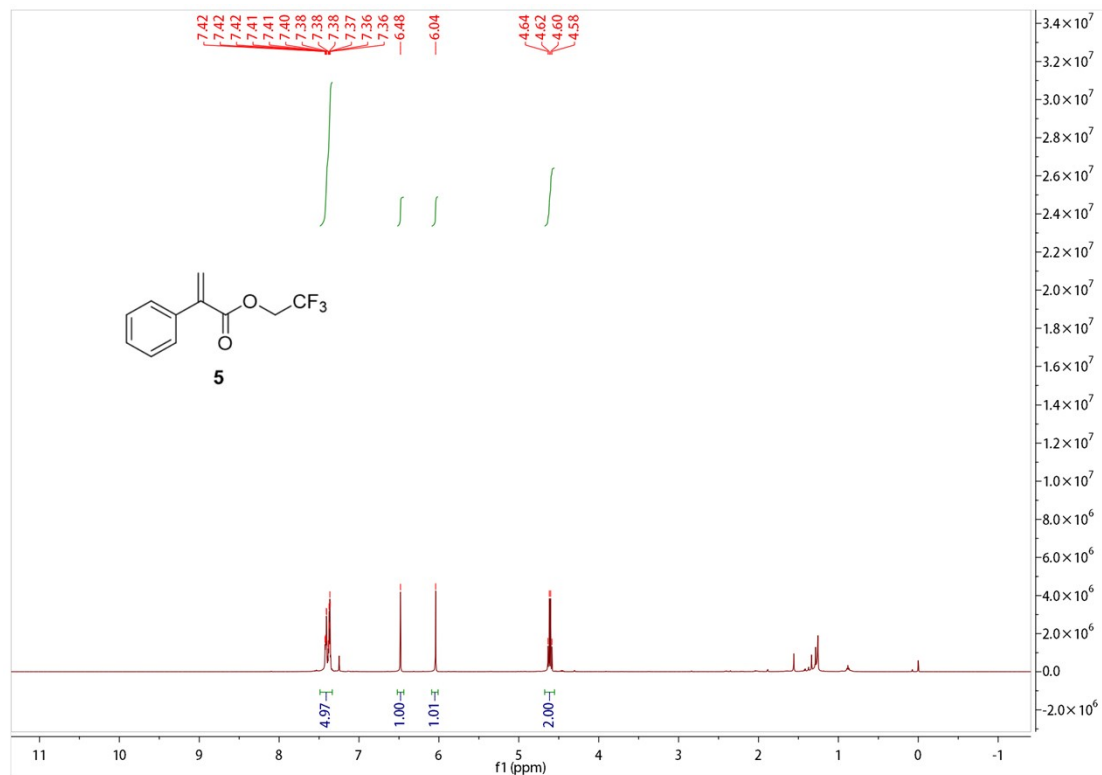

**<sup>19</sup>F NMR (471 MHz, CDCl<sub>3</sub>) spectrum for 5**

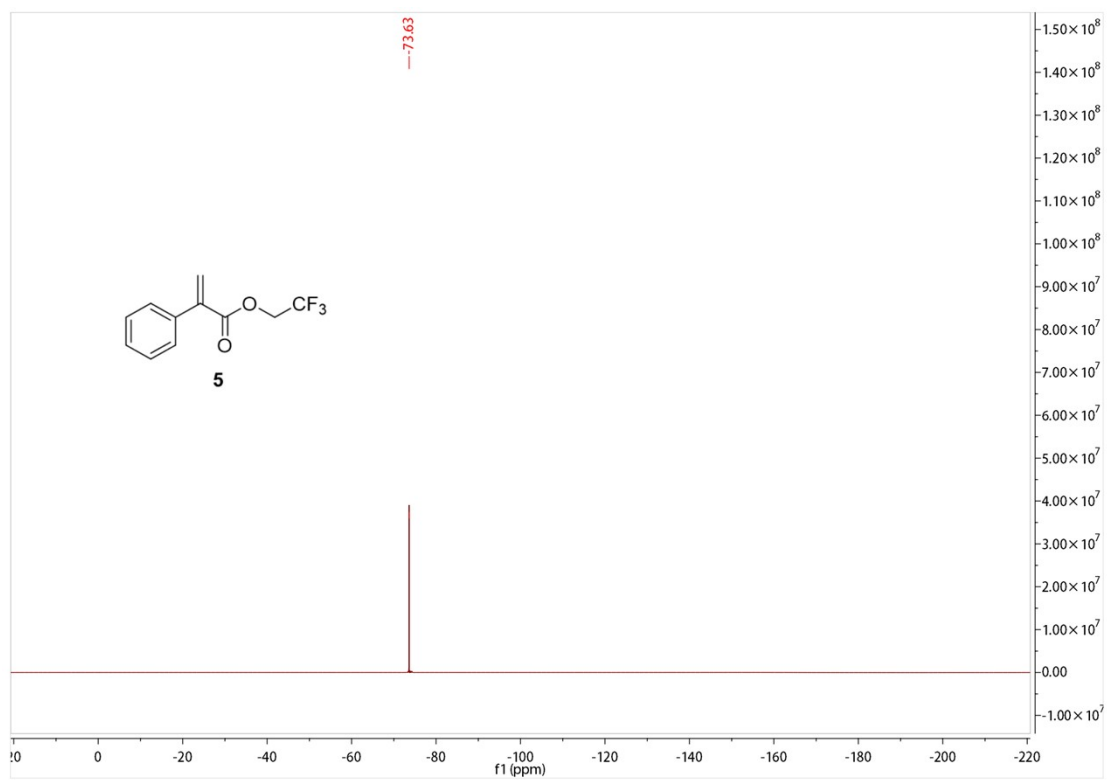

Supplement: d3cc01760e1.pdf [file d3cc01760e1.pdf]
